# Supplementary material for: Deconvolution of expression microarray data reveals 131I-induced responses otherwise undetected in thyroid tissue
Source: PubMed Central journal article supplement (PMC6042689; doi:10.1371/journal.pone.0197911), 2018-07-12
Supplement: pone.0197911.s003.pdf [file pone.0197911.s003.pdf]

**Supplemental Table 1. QPCR validation of microarray data**

| Target gene    | Comment                                | Differential regulation in thyroid after<br>24 h in response to 5.9 Gy from <sup>131</sup> I<br>compared with untreated control |                                                            |
|----------------|----------------------------------------|---------------------------------------------------------------------------------------------------------------------------------|------------------------------------------------------------|
|                |                                        | QPCR<br>(thyroid cDNA)<br>log <sub>2</sub>                                                                                      | Microarray data<br>(thyroid total RNA)<br>log <sub>2</sub> |
| <i>Atp2a1</i>  | different probe locations <sup>†</sup> | 8.5                                                                                                                             | 5.3                                                        |
| <i>Ccnd1</i>   | validated                              | -1.1                                                                                                                            | -0.92                                                      |
| <i>Ccng1</i>   | validated                              | 0.89                                                                                                                            | 0.81                                                       |
| <i>Klk1b16</i> | different probe locations <sup>‡</sup> | -7.1                                                                                                                            | -5.7                                                       |
| <i>Myh2</i>    | validated                              | 4.3                                                                                                                             | 4.3                                                        |
| <i>Pck1</i>    | validated                              | 1.8                                                                                                                             | 1.2                                                        |
| <i>Pvalb</i>   | validated                              | 4.1                                                                                                                             | 5.2                                                        |
| <i>Tpm2</i>    | validated                              | 5.7                                                                                                                             | 4.5                                                        |

Reference genes were chosen from microarray data that showed lowest overall transcriptional variation (i.e. *Cyp11b1*, *Rptn*, and *Prg3*).

<sup>†</sup>QPCR assay at location 1248; microarray probe at location 3361

<sup>‡</sup>QPCR assay at location 1051; microarray probe at location 1126
