# Supplementary material for: Deconvolution of expression microarray data reveals 131I-induced responses otherwise undetected in thyroid tissue
Source: PubMed Central journal article supplement (PMC6042689; doi:10.1371/journal.pone.0197911), 2018-07-12
Supplement: pone.0197911.s004.pdf [file pone.0197911.s004.pdf]

**Supplemental Table 2. List of significantly regulated transcripts in thyroid microarray data**

The log<sub>2</sub>-ratio threshold was set to 0.58 with a p-value threshold of 0.01.

Multiple test correction for FDR was performed using the Benjamini Hochberg method in NEXUS 3.0 (BioDiscovery; El Segundo, CA, USA).

The pool size for intensity based pooling was set to 200.

| <b>Gene Symbol</b>   | <b>Probe</b> | <b>Transcript</b> | <b>Log<sub>2</sub> ratio</b> | <b>adjusted p-value</b> |
|----------------------|--------------|-------------------|------------------------------|-------------------------|
| <i>Atp2a1</i>        | ILMN_2666864 | ILMN_216061       | 5.35                         | 0.0000                  |
| <i>Tnnc2</i>         | ILMN_2882658 | ILMN_188936       | 5.32                         | 0.0000                  |
| <i>Acta1</i>         | ILMN_2738825 | ILMN_221671       | 5.25                         | 0.0000                  |
| <i>Pvalb</i>         | ILMN_1218223 | ILMN_213948       | 5.24                         | 0.0000                  |
| <i>Tnni2</i>         | ILMN_2481133 | ILMN_191670       | 5.18                         | 0.0000                  |
| <i>Mylpf</i>         | ILMN_2977331 | ILMN_222158       | 5.05                         | 0.0000                  |
| <i>Mb</i>            | ILMN_2954987 | ILMN_210416       | 4.76                         | 0.0000                  |
| <i>Tpm2</i>          | ILMN_2482209 | ILMN_191790       | 4.53                         | 0.0000                  |
| <i>Tnnt3</i>         | ILMN_2469018 | ILMN_190311       | 4.51                         | 0.0000                  |
| <i>Cox6a2</i>        | ILMN_2629581 | ILMN_212725       | 4.48                         | 0.0000                  |
| <i>Myh4</i>          | ILMN_1241214 | ILMN_229231       | 4.26                         | 0.0000                  |
| <i>Myh2</i>          | ILMN_1219423 | ILMN_219104       | 4.26                         | 0.0000                  |
| <i>Ckm</i>           | ILMN_2608804 | ILMN_210754       | 4.26                         | 0.0000                  |
| <i>Ttn</i>           | ILMN_2416670 | ILMN_184200       | 4.19                         | 0.0000                  |
| <i>Ttn</i>           | ILMN_3128792 | ILMN_255016       | 4.18                         | 0.0000                  |
| <i>Rpl3l</i>         | ILMN_2649810 | ILMN_214607       | 4.10                         | 0.0000                  |
| <i>Ckmt2</i>         | ILMN_2817864 | ILMN_218610       | 4.01                         | 0.0000                  |
| <i>Tcap</i>          | ILMN_2933357 | ILMN_218508       | 3.92                         | 0.0000                  |
| <i>Mb</i>            | ILMN_1234662 | ILMN_210416       | 3.91                         | 0.0000                  |
| <i>Eno3</i>          | ILMN_2757569 | ILMN_222979       | 3.91                         | 0.0000                  |
| <i>Pgam2</i>         | ILMN_2588815 | ILMN_208713       | 3.90                         | 0.0000                  |
| <i>Myh1</i>          | ILMN_2865744 | ILMN_239496       | 3.85                         | 0.0000                  |
| <i>Ckmt2</i>         | ILMN_2698052 | ILMN_218610       | 3.82                         | 0.0000                  |
| <i>Mybpc2</i>        | ILMN_2676012 | ILMN_242030       | 3.69                         | 0.0000                  |
| <i>Eef1a2</i>        | ILMN_2971559 | ILMN_214177       | 3.65                         | 0.0000                  |
| <i>Actn3</i>         | ILMN_2747543 | ILMN_219398       | 3.64                         | 0.0000                  |
| <i>Fhl1</i>          | ILMN_3117381 | ILMN_245416       | 3.42                         | 0.0000                  |
| <i>Fhl1</i>          | ILMN_2713285 | ILMN_240873       | 3.39                         | 0.0000                  |
| <i>Myoz1</i>         | ILMN_2615250 | ILMN_211382       | 3.35                         | 0.0000                  |
| <i>Mlf1</i>          | ILMN_3112219 | ILMN_246637       | 3.32                         | 0.0000                  |
| <i>Ryr1</i>          | ILMN_2733073 | ILMN_226638       | 3.27                         | 0.0000                  |
| <i>Eef1a2</i>        | ILMN_2666990 | ILMN_214177       | 3.26                         | 0.0000                  |
| <i>Csrp3</i>         | ILMN_2789650 | ILMN_217987       | 3.26                         | 0.0000                  |
| <i>Actn2</i>         | ILMN_2797061 | ILMN_223487       | 3.25                         | 0.0000                  |
| <i>Des</i>           | ILMN_2836982 | ILMN_223243       | 3.20                         | 0.0000                  |
| <i>Actn3</i>         | ILMN_3008110 | ILMN_219398       | 3.20                         | 0.0000                  |
| <i>8030451F13Rik</i> | ILMN_2744469 | ILMN_256951       | 3.14                         | 0.0000                  |
| <i>Ryr1</i>          | ILMN_2730425 | ILMN_226638       | 3.12                         | 0.0000                  |
| <i>Tmod4</i>         | ILMN_2488846 | ILMN_228148       | 3.07                         | 0.0000                  |
| <i>Hrc</i>           | ILMN_1259206 | ILMN_221655       | 3.05                         | 0.0000                  |
| <i>Myom1</i>         | ILMN_2815138 | ILMN_241505       | 3.00                         | 0.0000                  |
| <i>Ampd1</i>         | ILMN_1237871 | ILMN_259430       | 2.99                         | 0.0000                  |

|                      |              |             |      |        |
|----------------------|--------------|-------------|------|--------|
| <i>Tmod4</i>         | ILMN_2519313 | ILMN_228148 | 2.96 | 0.0000 |
| <i>Ryr1</i>          | ILMN_2842357 | ILMN_226638 | 2.95 | 0.0000 |
| <i>2310002L09Rik</i> | ILMN_1214119 | ILMN_215549 | 2.94 | 0.0000 |
| <i>Csrp3</i>         | ILMN_2742068 | ILMN_217987 | 2.94 | 0.0000 |
| <i>H19</i>           | ILMN_2906728 | ILMN_219881 | 2.81 | 0.0000 |
| <i>Myl1</i>          | ILMN_2694907 | ILMN_218373 | 2.79 | 0.0000 |
| <i>8030451F13Rik</i> | ILMN_2969105 | ILMN_256951 | 2.78 | 0.0000 |
| <i>Nrap</i>          | ILMN_1235070 | ILMN_217102 | 2.77 | 0.0000 |
| <i>Hspb6</i>         | ILMN_2805339 | ILMN_234898 | 2.75 | 0.0000 |
| <i>Mef2c</i>         | ILMN_1214950 | ILMN_235198 | 2.67 | 0.0000 |
| <i>Fxyd6</i>         | ILMN_2609998 | ILMN_210866 | 2.62 | 0.0000 |
| <i>Myl1</i>          | ILMN_2878542 | ILMN_218373 | 2.60 | 0.0000 |
| <i>Asb2</i>          | ILMN_2765759 | ILMN_223558 | 2.58 | 0.0000 |
| <i>Smpx</i>          | ILMN_2785679 | ILMN_208970 | 2.54 | 0.0000 |
| <i>A2bp1</i>         | ILMN_1238309 | ILMN_216899 | 2.46 | 0.0000 |
| <i>Ampd1</i>         | ILMN_2971142 | ILMN_259430 | 2.45 | 0.0000 |
| <i>Pkia</i>          | ILMN_2674122 | ILMN_216692 | 2.43 | 0.0000 |
| <i>Csrp3</i>         | ILMN_2789651 | ILMN_217987 | 2.41 | 0.0000 |
| <i>Myh1</i>          | ILMN_2740259 | ILMN_239496 | 2.39 | 0.0000 |
| <i>Myoz2</i>         | ILMN_1234857 | ILMN_223119 | 2.38 | 0.0000 |
| <i>Tmod4</i>         | ILMN_2438793 | ILMN_228148 | 2.37 | 0.0000 |
| <i>Rtn2</i>          | ILMN_1250904 | ILMN_213030 | 2.36 | 0.0000 |
| <i>Pde4dip</i>       | ILMN_3064283 | ILMN_228537 | 2.33 | 0.0000 |
| <i>Mlf1</i>          | ILMN_2658425 | ILMN_215347 | 2.30 | 0.0000 |
| <i>Trim72</i>        | ILMN_2900484 | ILMN_252980 | 2.28 | 0.0001 |
| <i>Cryab</i>         | ILMN_2840213 | ILMN_217805 | 2.23 | 0.0000 |
| <i>Pdlim5</i>        | ILMN_3137570 | ILMN_235674 | 2.23 | 0.0000 |
| <i>Ntrk2</i>         | ILMN_3138904 | ILMN_259664 | 2.22 | 0.0000 |
| <i>Schip1</i>        | ILMN_2937320 | ILMN_216237 | 2.22 | 0.0000 |
| <i>Adssl1</i>        | ILMN_1245079 | ILMN_210075 | 2.22 | 0.0000 |
| <i>Mat2a</i>         | ILMN_2978838 | ILMN_261868 | 2.16 | 0.0000 |
| <i>Adssl1</i>        | ILMN_2958099 | ILMN_210075 | 2.14 | 0.0000 |
| <i>Scn4b</i>         | ILMN_2813547 | ILMN_255776 | 2.13 | 0.0000 |
| <i>LOC669660</i>     | ILMN_2771219 | ILMN_260938 | 2.09 | 0.0000 |
| <i>Abcb4</i>         | ILMN_2648742 | ILMN_214510 | 2.08 | 0.0000 |
| <i>Cacna2d1</i>      | ILMN_2752030 | ILMN_222592 | 2.07 | 0.0000 |
| <i>Fsd2</i>          | ILMN_1242790 | ILMN_211390 | 2.00 | 0.0000 |
| <i>Gpc1</i>          | ILMN_2635784 | ILMN_244157 | 1.99 | 0.0000 |
| <i>2310042D19Rik</i> | ILMN_2957987 | ILMN_217547 | 1.95 | 0.0000 |
| <i>Tmem38a</i>       | ILMN_1245673 | ILMN_212903 | 1.94 | 0.0000 |
| <i>Kcnc4</i>         | ILMN_2771095 | ILMN_215081 | 1.93 | 0.0000 |
| <i>Sln</i>           | ILMN_2918875 | ILMN_215725 | 1.93 | 0.0000 |
| <i>Sypl2</i>         | ILMN_2625299 | ILMN_212339 | 1.92 | 0.0000 |
| <i>Neurl</i>         | ILMN_2625940 | ILMN_212397 | 1.90 | 0.0000 |
| <i>Epdr1</i>         | ILMN_1225494 | ILMN_214840 | 1.90 | 0.0000 |
| <i>1300013J15Rik</i> | ILMN_2849016 | ILMN_210868 | 1.89 | 0.0000 |
| <i>AI595366</i>      | ILMN_3161863 | ILMN_253609 | 1.88 | 0.0000 |
| <i>Mustn1</i>        | ILMN_2797928 | ILMN_215350 | 1.86 | 0.0000 |
| <i>8430408G22Rik</i> | ILMN_2894211 | ILMN_218091 | 1.85 | 0.0000 |
| <i>Ky</i>            | ILMN_2906855 | ILMN_225797 | 1.84 | 0.0000 |

|                     |              |             |      |        |
|---------------------|--------------|-------------|------|--------|
| <i>Pdzrn3</i>       | ILMN_3156010 | ILMN_214528 | 1.82 | 0.0000 |
| <i>Fbxo32</i>       | ILMN_2873444 | ILMN_219973 | 1.81 | 0.0000 |
| <i>Dtna</i>         | ILMN_1221805 | ILMN_223037 | 1.80 | 0.0000 |
| <i>Ak1</i>          | ILMN_2667805 | ILMN_251058 | 1.80 | 0.0000 |
| <i>Dmn</i>          | ILMN_1214880 | ILMN_250370 | 1.74 | 0.0000 |
| <i>Pfkm</i>         | ILMN_3004553 | ILMN_208909 | 1.72 | 0.0000 |
| <i>Tmem100</i>      | ILMN_1224014 | ILMN_223572 | 1.71 | 0.0000 |
| <i>Pitx2</i>        | ILMN_3118071 | ILMN_237162 | 1.68 | 0.0000 |
| <i>Kif1b</i>        | ILMN_3034877 | ILMN_207470 | 1.68 | 0.0000 |
| <i>Camk2b</i>       | ILMN_1236009 | ILMN_223176 | 1.67 | 0.0000 |
| <i>Pfn2</i>         | ILMN_2929791 | ILMN_210891 | 1.67 | 0.0069 |
| <i>Rilpl1</i>       | ILMN_2848163 | ILMN_218974 | 1.66 | 0.0000 |
| <i>Unc45b</i>       | ILMN_3153940 | ILMN_221227 | 1.65 | 0.0000 |
| <i>Pop5</i>         | ILMN_2973925 | ILMN_213331 | 1.62 | 0.0000 |
| <i>Gmpr</i>         | ILMN_2602581 | ILMN_210136 | 1.60 | 0.0004 |
| <i>Mustn1</i>       | ILMN_2658461 | ILMN_215350 | 1.59 | 0.0000 |
| <i>Rcsd1</i>        | ILMN_1250704 | ILMN_214047 | 1.58 | 0.0000 |
| <i>Scgb1a1</i>      | ILMN_2749152 | ILMN_222406 | 1.57 | 0.0000 |
| <i>Ank1</i>         | ILMN_2715601 | ILMN_208704 | 1.56 | 0.0000 |
| <i>LOC100046690</i> | ILMN_1236869 | ILMN_312512 | 1.55 | 0.0000 |
| <i>Knq1</i>         | ILMN_2788223 | ILMN_214717 | 1.55 | 0.0000 |
| <i>Ptp4a3</i>       | ILMN_2655260 | ILMN_213418 | 1.54 | 0.0000 |
| <i>Ddit4l</i>       | ILMN_2695819 | ILMN_218436 | 1.53 | 0.0004 |
| <i>Pfn2</i>         | ILMN_1260064 | ILMN_210891 | 1.52 | 0.0000 |
| <i>LOC100044934</i> | ILMN_2732747 | ILMN_318532 | 1.52 | 0.0000 |
| <i>Mrpl37</i>       | ILMN_1254715 | ILMN_221393 | 1.51 | 0.0000 |
| <i>Mef2c</i>        | ILMN_2732465 | ILMN_235198 | 1.47 | 0.0003 |
| <i>Pfkm</i>         | ILMN_2628892 | ILMN_208909 | 1.47 | 0.0000 |
| <i>Dmn</i>          | ILMN_2636266 | ILMN_250370 | 1.46 | 0.0000 |
| <i>Tuba8</i>        | ILMN_1221298 | ILMN_248050 | 1.44 | 0.0000 |
| <i>Cyp2b10</i>      | ILMN_2594926 | ILMN_230152 | 1.44 | 0.0000 |
| <i>Gstp2</i>        | ILMN_2917386 | ILMN_258260 | 1.42 | 0.0004 |
| <i>Capzb</i>        | ILMN_3031009 | ILMN_253743 | 1.42 | 0.0000 |
| <i>LOC100046690</i> | ILMN_1244879 | ILMN_312512 | 1.41 | 0.0000 |
| <i>Pdlim3</i>       | ILMN_1235230 | ILMN_213954 | 1.41 | 0.0000 |
| <i>Phtf2</i>        | ILMN_1252206 | ILMN_218550 | 1.41 | 0.0000 |
| <i>Rbm38</i>        | ILMN_1240979 | ILMN_210582 | 1.40 | 0.0000 |
| <i>Wfdc1</i>        | ILMN_2466164 | ILMN_189984 | 1.37 | 0.0000 |
| <i>Pdlim3</i>       | ILMN_2885990 | ILMN_213954 | 1.36 | 0.0000 |
| <i>Aqp1</i>         | ILMN_2980661 | ILMN_216314 | 1.35 | 0.0000 |
| <i>Mef2c</i>        | ILMN_2887992 | ILMN_235198 | 1.34 | 0.0000 |
| <i>Aqp1</i>         | ILMN_2756486 | ILMN_216314 | 1.34 | 0.0000 |
| <i>Lynx1</i>        | ILMN_1256369 | ILMN_218793 | 1.33 | 0.0004 |
| <i>Art3</i>         | ILMN_1223147 | ILMN_210398 | 1.29 | 0.0003 |
| <i>Popdc2</i>       | ILMN_3128351 | ILMN_211242 | 1.29 | 0.0000 |
| <i>Suclg1</i>       | ILMN_2683681 | ILMN_217480 | 1.29 | 0.0000 |
| <i>Tbx1</i>         | ILMN_1252399 | ILMN_226888 | 1.27 | 0.0002 |
| <i>Knq2</i>         | ILMN_3126522 | ILMN_199376 | 1.27 | 0.0000 |
| <i>Cpt1b</i>        | ILMN_2709240 | ILMN_216493 | 1.26 | 0.0000 |
| <i>Atp1a2</i>       | ILMN_2722716 | ILMN_220489 | 1.26 | 0.0000 |

|                      |              |             |      |        |
|----------------------|--------------|-------------|------|--------|
| <i>Popdc3</i>        | ILMN_2895568 | ILMN_210556 | 1.25 | 0.0000 |
| <i>Reep1</i>         | ILMN_2791644 | ILMN_218368 | 1.25 | 0.0000 |
| <i>2310003L22Rik</i> | ILMN_1216813 | ILMN_222302 | 1.25 | 0.0035 |
| <i>Art3</i>          | ILMN_2836607 | ILMN_210398 | 1.23 | 0.0000 |
| <i>Olig1</i>         | ILMN_2760105 | ILMN_223162 | 1.23 | 0.0000 |
| <i>Slc27a2</i>       | ILMN_2648445 | ILMN_258646 | 1.23 | 0.0081 |
| <i>Tmem45b</i>       | ILMN_2661366 | ILMN_215591 | 1.22 | 0.0000 |
| <i>Acin1</i>         | ILMN_2755195 | ILMN_222814 | 1.21 | 0.0001 |
| <i>EG277333</i>      | ILMN_2591127 | ILMN_315488 | 1.21 | 0.0000 |
| <i>Tcea3</i>         | ILMN_2907214 | ILMN_243591 | 1.21 | 0.0000 |
| <i>Rtn4</i>          | ILMN_3140071 | ILMN_216522 | 1.20 | 0.0000 |
| <i>Hoxa5</i>         | ILMN_1217978 | ILMN_213378 | 1.20 | 0.0000 |
| <i>Fabp4</i>         | ILMN_2615947 | ILMN_211442 | 1.19 | 0.0000 |
| <i>Ndrp2</i>         | ILMN_3001650 | ILMN_244033 | 1.18 | 0.0001 |
| <i>Hbb-b1</i>        | ILMN_1235372 | ILMN_212995 | 1.18 | 0.0001 |
| <i>B230339M05Rik</i> | ILMN_2894574 | ILMN_260273 | 1.18 | 0.0001 |
| <i>Clpx</i>          | ILMN_3154849 | ILMN_211234 | 1.18 | 0.0000 |
| <i>Pck1</i>          | ILMN_1213632 | ILMN_238641 | 1.17 | 0.0001 |
| <i>Lyve1</i>         | ILMN_2483304 | ILMN_191911 | 1.17 | 0.0000 |
| <i>Sdhb</i>          | ILMN_2592389 | ILMN_209086 | 1.17 | 0.0002 |
| <i>Car14</i>         | ILMN_2973824 | ILMN_208706 | 1.16 | 0.0000 |
| <i>Mkks</i>          | ILMN_1257332 | ILMN_217710 | 1.16 | 0.0000 |
| <i>Rtn4</i>          | ILMN_2699645 | ILMN_216522 | 1.15 | 0.0000 |
| <i>Vldlr</i>         | ILMN_1218264 | ILMN_188056 | 1.15 | 0.0000 |
| <i>Srpk3</i>         | ILMN_2684515 | ILMN_217542 | 1.15 | 0.0000 |
| <i>Fabp3</i>         | ILMN_2887630 | ILMN_210798 | 1.14 | 0.0000 |
| <i>A930009M04Rik</i> | ILMN_2734855 | ILMN_189339 | 1.13 | 0.0000 |
| <i>Vldlr</i>         | ILMN_2515601 | ILMN_188056 | 1.13 | 0.0000 |
| <i>Asah3l</i>        | ILMN_2629112 | ILMN_212677 | 1.13 | 0.0000 |
| <i>Twf2</i>          | ILMN_1234388 | ILMN_212893 | 1.13 | 0.0000 |
| <i>Alas2</i>         | ILMN_2675874 | ILMN_216832 | 1.12 | 0.0002 |
| <i>Acadl</i>         | ILMN_2735084 | ILMN_217932 | 1.12 | 0.0000 |
| <i>Angptl4</i>       | ILMN_2759365 | ILMN_259520 | 1.12 | 0.0000 |
| <i>Vldlr</i>         | ILMN_2796472 | ILMN_188056 | 1.12 | 0.0000 |
| <i>D10Jhu81e</i>     | ILMN_2991545 | ILMN_223114 | 1.11 | 0.0000 |
| <i>Ahnak</i>         | ILMN_1258578 | ILMN_253782 | 1.09 | 0.0001 |
| <i>Pparg</i>         | ILMN_1221594 | ILMN_212393 | 1.09 | 0.0004 |
| <i>Aqp7</i>          | ILMN_2943165 | ILMN_210666 | 1.09 | 0.0000 |
| <i>Gyg</i>           | ILMN_2686069 | ILMN_215615 | 1.09 | 0.0000 |
| <i>Igf2</i>          | ILMN_2597769 | ILMN_209642 | 1.08 | 0.0034 |
| <i>2310076L09Rik</i> | ILMN_3158565 | ILMN_210594 | 1.08 | 0.0001 |
| <i>Pcolce2</i>       | ILMN_1238603 | ILMN_211112 | 1.08 | 0.0037 |
| <i>Coq6</i>          | ILMN_2766720 | ILMN_211735 | 1.07 | 0.0001 |
| <i>Tmod1</i>         | ILMN_2977404 | ILMN_189256 | 1.07 | 0.0000 |
| <i>Cd274</i>         | ILMN_1226800 | ILMN_208897 | 1.07 | 0.0003 |
| <i>Hoxb4</i>         | ILMN_1241077 | ILMN_231624 | 1.07 | 0.0000 |
| <i>Itih4</i>         | ILMN_2718431 | ILMN_212489 | 1.07 | 0.0055 |
| <i>Rbm38</i>         | ILMN_2926155 | ILMN_210582 | 1.07 | 0.0002 |
| <i>2310003L22Rik</i> | ILMN_2747677 | ILMN_222302 | 1.06 | 0.0000 |
| <i>Cox7a1</i>        | ILMN_1240857 | ILMN_215598 | 1.06 | 0.0000 |

|                  |              |             |      |        |
|------------------|--------------|-------------|------|--------|
| <i>Acot11</i>    | ILMN_2799351 | ILMN_217575 | 1.05 | 0.0007 |
| <i>Etfa</i>      | ILMN_2649966 | ILMN_214618 | 1.05 | 0.0000 |
| <i>Gpc3</i>      | ILMN_2832979 | ILMN_220269 | 1.05 | 0.0064 |
| <i>Lrrc39</i>    | ILMN_1230043 | ILMN_218323 | 1.05 | 0.0002 |
| <i>St3gal3</i>   | ILMN_2879848 | ILMN_211800 | 1.05 | 0.0005 |
| <i>Hspb1</i>     | ILMN_2706269 | ILMN_224679 | 1.03 | 0.0012 |
| <i>Zeb1</i>      | ILMN_2492500 | ILMN_232490 | 1.03 | 0.0001 |
| <i>Vdac1</i>     | ILMN_2832808 | ILMN_237906 | 1.03 | 0.0003 |
| <i>Adora1</i>    | ILMN_3143358 | ILMN_238585 | 1.02 | 0.0039 |
| <i>Sgcb</i>      | ILMN_1222716 | ILMN_209284 | 1.02 | 0.0002 |
| <i>Aldh1a1</i>   | ILMN_1222734 | ILMN_261983 | 1.02 | 0.0006 |
| <i>Ntrk2</i>     | ILMN_2705460 | ILMN_240641 | 1.01 | 0.0004 |
| <i>Crls1</i>     | ILMN_1219797 | ILMN_260069 | 1.01 | 0.0004 |
| <i>Gpx3</i>      | ILMN_2715546 | ILMN_219947 | 1.01 | 0.0001 |
| <i>Grb14</i>     | ILMN_2625280 | ILMN_212337 | 1.01 | 0.0063 |
| <i>EG317677</i>  | ILMN_2929594 | ILMN_213670 | 1.00 | 0.0000 |
| <i>Aldoa</i>     | ILMN_2599130 | ILMN_209778 | 1.00 | 0.0000 |
| <i>Maob</i>      | ILMN_2719069 | ILMN_211647 | 1.00 | 0.0017 |
| <i>Cdsn</i>      | ILMN_2796382 | ILMN_229304 | 1.00 | 0.0001 |
| <i>Aqp1</i>      | ILMN_2980663 | ILMN_216314 | 1.00 | 0.0024 |
| <i>Mtap7d1</i>   | ILMN_2855590 | ILMN_219950 | 0.99 | 0.0001 |
| <i>Aqp4</i>      | ILMN_2757232 | ILMN_247494 | 0.99 | 0.0000 |
| <i>Tnxb</i>      | ILMN_2440823 | ILMN_187061 | 0.99 | 0.0059 |
| <i>Ppara</i>     | ILMN_2927172 | ILMN_221142 | 0.99 | 0.0009 |
| <i>Acaa2</i>     | ILMN_2704823 | ILMN_254698 | 0.99 | 0.0001 |
| <i>Egfl7</i>     | ILMN_3163288 | ILMN_257108 | 0.99 | 0.0007 |
| <i>Otop1</i>     | ILMN_1228647 | ILMN_214803 | 0.98 | 0.0001 |
| <i>St3gal6</i>   | ILMN_2695199 | ILMN_230085 | 0.98 | 0.0000 |
| <i>Letm1</i>     | ILMN_2755152 | ILMN_211496 | 0.98 | 0.0001 |
| <i>V1rd6</i>     | ILMN_2971043 | ILMN_194381 | 0.98 | 0.0000 |
| <i>Npr3</i>      | ILMN_3127391 | ILMN_243188 | 0.98 | 0.0000 |
| <i>Hbb-b2</i>    | ILMN_2729513 | ILMN_220984 | 0.97 | 0.0026 |
| <i>Knq1</i>      | ILMN_2788221 | ILMN_214717 | 0.97 | 0.0008 |
| <i>LOC620807</i> | ILMN_2953807 | ILMN_234960 | 0.97 | 0.0015 |
| <i>Xdh</i>       | ILMN_1239055 | ILMN_246330 | 0.97 | 0.0010 |
| <i>Cpt1b</i>     | ILMN_1227666 | ILMN_216493 | 0.97 | 0.0006 |
| <i>ldh3g</i>     | ILMN_1224368 | ILMN_213852 | 0.96 | 0.0001 |
| <i>Mgst3</i>     | ILMN_1238479 | ILMN_210134 | 0.96 | 0.0001 |
| <i>Acadl</i>     | ILMN_2783519 | ILMN_217932 | 0.96 | 0.0010 |
| <i>Mgst3</i>     | ILMN_2615035 | ILMN_210134 | 0.96 | 0.0001 |
| <i>Letmd1</i>    | ILMN_2616215 | ILMN_211469 | 0.96 | 0.0051 |
| <i>Ppp1r1a</i>   | ILMN_2616584 | ILMN_211515 | 0.95 | 0.0001 |
| <i>Atp5j2</i>    | ILMN_1213914 | ILMN_222082 | 0.95 | 0.0000 |
| <i>Sgk3</i>      | ILMN_3108894 | ILMN_226965 | 0.94 | 0.0000 |
| <i>Clstn3</i>    | ILMN_2827217 | ILMN_209442 | 0.94 | 0.0022 |
| <i>Pparg</i>     | ILMN_1221060 | ILMN_212393 | 0.94 | 0.0017 |
| <i>AI427515</i>  | ILMN_1226356 | ILMN_223744 | 0.94 | 0.0001 |
| <i>Acaa2</i>     | ILMN_2704826 | ILMN_211418 | 0.94 | 0.0004 |
| <i>Otop1</i>     | ILMN_3137899 | ILMN_214803 | 0.94 | 0.0003 |
| <i>Atp5k</i>     | ILMN_2776899 | ILMN_224224 | 0.94 | 0.0072 |

|                      |              |             |      |        |
|----------------------|--------------|-------------|------|--------|
| <i>Macrod1</i>       | ILMN_2683986 | ILMN_217502 | 0.93 | 0.0001 |
| <i>Acaa2</i>         | ILMN_2704822 | ILMN_211418 | 0.93 | 0.0004 |
| <i>Acsm3</i>         | ILMN_3111685 | ILMN_249319 | 0.93 | 0.0038 |
| <i>Gbp3</i>          | ILMN_2918002 | ILMN_216816 | 0.93 | 0.0036 |
| <i>Kcnk3</i>         | ILMN_2669487 | ILMN_259977 | 0.92 | 0.0008 |
| <i>Vim</i>           | ILMN_2451022 | ILMN_187199 | 0.92 | 0.0030 |
| <i>2810055F11Rik</i> | ILMN_1230505 | ILMN_213841 | 0.92 | 0.0004 |
| <i>Itga11</i>        | ILMN_2701778 | ILMN_210182 | 0.92 | 0.0043 |
| <i>S100a13</i>       | ILMN_2987984 | ILMN_218915 | 0.92 | 0.0005 |
| <i>Rab6b</i>         | ILMN_2761430 | ILMN_223251 | 0.92 | 0.0002 |
| <i>Cd36</i>          | ILMN_1232470 | ILMN_210534 | 0.92 | 0.0007 |
| <i>Ly6c1</i>         | ILMN_1254927 | ILMN_234229 | 0.92 | 0.0025 |
| <i>Tle4</i>          | ILMN_2589792 | ILMN_208815 | 0.92 | 0.0006 |
| <i>Aqp7</i>          | ILMN_1254953 | ILMN_210666 | 0.91 | 0.0007 |
| <i>Lipe</i>          | ILMN_2742636 | ILMN_221959 | 0.91 | 0.0000 |
| <i>Ndufb2</i>        | ILMN_2636435 | ILMN_226970 | 0.91 | 0.0002 |
| <i>Etfdh</i>         | ILMN_3005058 | ILMN_216328 | 0.91 | 0.0001 |
| <i>Ugp2</i>          | ILMN_1244631 | ILMN_193899 | 0.91 | 0.0033 |
| <i>Ndufb5</i>        | ILMN_2617335 | ILMN_211581 | 0.90 | 0.0002 |
| <i>2310076L09Rik</i> | ILMN_2607215 | ILMN_210594 | 0.90 | 0.0021 |
| <i>LOC668837</i>     | ILMN_2587859 | ILMN_312076 | 0.90 | 0.0010 |
| <i>Cenpa</i>         | ILMN_1236574 | ILMN_223574 | 0.90 | 0.0034 |
| <i>Eif4e3</i>        | ILMN_1254878 | ILMN_211293 | 0.90 | 0.0002 |
| <i>Cidea</i>         | ILMN_1215446 | ILMN_221565 | 0.89 | 0.0004 |
| <i>Rusc2</i>         | ILMN_1214953 | ILMN_224812 | 0.89 | 0.0009 |
| <i>Ecm1</i>          | ILMN_2947526 | ILMN_213475 | 0.89 | 0.0003 |
| <i>Tmem14c</i>       | ILMN_2472110 | ILMN_186398 | 0.89 | 0.0000 |
| <i>Rasl2-9</i>       | ILMN_1229223 | ILMN_219836 | 0.89 | 0.0004 |
| <i>Gbp3</i>          | ILMN_1244513 | ILMN_216816 | 0.89 | 0.0005 |
| <i>Dpt</i>           | ILMN_2606210 | ILMN_210496 | 0.89 | 0.0004 |
| <i>Hba-a1</i>        | ILMN_1212702 | ILMN_216083 | 0.89 | 0.0001 |
| <i>Myo5b</i>         | ILMN_2610576 | ILMN_210919 | 0.89 | 0.0054 |
| <i>Stbd1</i>         | ILMN_2663211 | ILMN_215752 | 0.89 | 0.0057 |
| <i>Rgs5</i>          | ILMN_2979824 | ILMN_256631 | 0.89 | 0.0033 |
| <i>Usmg5</i>         | ILMN_1219002 | ILMN_194875 | 0.88 | 0.0074 |
| <i>Ubac1</i>         | ILMN_1241976 | ILMN_185910 | 0.88 | 0.0027 |
| <i>Gpd2</i>          | ILMN_1215797 | ILMN_214592 | 0.88 | 0.0002 |
| <i>Phlda3</i>        | ILMN_2923607 | ILMN_212624 | 0.88 | 0.0042 |
| <i>Acaa2</i>         | ILMN_2788984 | ILMN_254698 | 0.87 | 0.0017 |
| <i>Sftpc</i>         | ILMN_2638865 | ILMN_213605 | 0.87 | 0.0002 |
| <i>Eif4e3</i>        | ILMN_2643291 | ILMN_211293 | 0.87 | 0.0016 |
| <i>Dci</i>           | ILMN_2615207 | ILMN_211377 | 0.87 | 0.0001 |
| <i>Cdh13</i>         | ILMN_2592321 | ILMN_228863 | 0.86 | 0.0006 |
| <i>Hdc</i>           | ILMN_2965903 | ILMN_242858 | 0.86 | 0.0046 |
| <i>Hp</i>            | ILMN_2668510 | ILMN_214144 | 0.86 | 0.0076 |
| <i>DOH4S114</i>      | ILMN_2680054 | ILMN_217188 | 0.86 | 0.0019 |
| <i>Akap1</i>         | ILMN_3146196 | ILMN_234975 | 0.86 | 0.0016 |
| <i>Slc25a4</i>       | ILMN_1225312 | ILMN_249346 | 0.86 | 0.0000 |
| <i>Lgals9</i>        | ILMN_2752873 | ILMN_220025 | 0.86 | 0.0060 |
| <i>Tmem65</i>        | ILMN_2987564 | ILMN_255403 | 0.86 | 0.0001 |

|                      |              |             |      |        |
|----------------------|--------------|-------------|------|--------|
| <i>Glul</i>          | ILMN_2644496 | ILMN_208631 | 0.86 | 0.0036 |
| <i>Pkig</i>          | ILMN_3090728 | ILMN_230872 | 0.86 | 0.0018 |
| <i>Mdh2</i>          | ILMN_2873112 | ILMN_223596 | 0.86 | 0.0029 |
| <i>Sh3rf2</i>        | ILMN_2942551 | ILMN_213769 | 0.85 | 0.0000 |
| <i>Sdpr</i>          | ILMN_2687547 | ILMN_217783 | 0.85 | 0.0005 |
| <i>Dbp</i>           | ILMN_2616226 | ILMN_211471 | 0.85 | 0.0002 |
| <i>Cib2</i>          | ILMN_2659168 | ILMN_215411 | 0.85 | 0.0049 |
| <i>Qrs1</i>          | ILMN_1214450 | ILMN_230382 | 0.85 | 0.0007 |
| <i>A130092J06Rik</i> | ILMN_2601453 | ILMN_210026 | 0.85 | 0.0007 |
| <i>Zadh1</i>         | ILMN_2476885 | ILMN_191185 | 0.85 | 0.0087 |
| <i>Lor</i>           | ILMN_1241825 | ILMN_218790 | 0.84 | 0.0005 |
| <i>Mreg</i>          | ILMN_2976159 | ILMN_253687 | 0.84 | 0.0000 |
| <i>Ebf2</i>          | ILMN_2883606 | ILMN_221447 | 0.84 | 0.0092 |
| <i>Txn2</i>          | ILMN_1257624 | ILMN_192993 | 0.84 | 0.0010 |
| <i>Optn</i>          | ILMN_2907370 | ILMN_216896 | 0.84 | 0.0083 |
| <i>Lims2</i>         | ILMN_2738345 | ILMN_221324 | 0.84 | 0.0005 |
| <i>Cd209d</i>        | ILMN_2696291 | ILMN_218474 | 0.84 | 0.0005 |
| <i>Pkm2</i>          | ILMN_2756041 | ILMN_222874 | 0.84 | 0.0051 |
| <i>Srgn</i>          | ILMN_2722732 | ILMN_220490 | 0.84 | 0.0056 |
| <i>Acadvl</i>        | ILMN_2956932 | ILMN_249043 | 0.84 | 0.0003 |
| <i>Slc25a19</i>      | ILMN_1237074 | ILMN_211007 | 0.84 | 0.0015 |
| <i>Acat2</i>         | ILMN_1253008 | ILMN_217761 | 0.83 | 0.0089 |
| <i>Echdc3</i>        | ILMN_1234901 | ILMN_211941 | 0.83 | 0.0005 |
| <i>Rnf125</i>        | ILMN_2917338 | ILMN_209261 | 0.83 | 0.0011 |
| <i>Pdhb</i>          | ILMN_3041839 | ILMN_213240 | 0.83 | 0.0007 |
| <i>LOC100047606</i>  | ILMN_2675199 | ILMN_317392 | 0.83 | 0.0074 |
| <i>Adora1</i>        | ILMN_1254016 | ILMN_238585 | 0.83 | 0.0002 |
| <i>Hp</i>            | ILMN_2668509 | ILMN_214144 | 0.83 | 0.0047 |
| <i>Tppp3</i>         | ILMN_2655929 | ILMN_215136 | 0.83 | 0.0000 |
| <i>Ndufa8</i>        | ILMN_2682019 | ILMN_217333 | 0.82 | 0.0018 |
| <i>Sdcbp2</i>        | ILMN_2825446 | ILMN_217512 | 0.82 | 0.0022 |
| <i>Sgcb</i>          | ILMN_1255256 | ILMN_209284 | 0.82 | 0.0083 |
| <i>Tubb6</i>         | ILMN_2718217 | ILMN_220148 | 0.82 | 0.0055 |
| <i>EG622339</i>      | ILMN_3006990 | ILMN_232532 | 0.82 | 0.0006 |
| <i>Cox7b</i>         | ILMN_2671689 | ILMN_242680 | 0.82 | 0.0009 |
| <i>Itih4</i>         | ILMN_2797276 | ILMN_212489 | 0.81 | 0.0016 |
| <i>Ndufb4</i>        | ILMN_1227012 | ILMN_223783 | 0.81 | 0.0007 |
| <i>Tmem70</i>        | ILMN_3153614 | ILMN_217035 | 0.81 | 0.0008 |
| <i>Ramp1</i>         | ILMN_2734391 | ILMN_221353 | 0.81 | 0.0016 |
| <i>Ccng1</i>         | ILMN_2500276 | ILMN_232357 | 0.81 | 0.0076 |
| <i>Cox8b</i>         | ILMN_2727520 | ILMN_220835 | 0.81 | 0.0007 |
| <i>Lrtm1</i>         | ILMN_1241151 | ILMN_209217 | 0.80 | 0.0052 |
| <i>Prkag2</i>        | ILMN_3161626 | ILMN_221101 | 0.80 | 0.0002 |
| <i>2810453I06Rik</i> | ILMN_1224076 | ILMN_244463 | 0.80 | 0.0091 |
| <i>Nol3</i>          | ILMN_2931033 | ILMN_213608 | 0.80 | 0.0091 |
| <i>Nox4</i>          | ILMN_2698499 | ILMN_218644 | 0.80 | 0.0003 |
| <i>Cldn5</i>         | ILMN_1241293 | ILMN_224508 | 0.80 | 0.0085 |
| <i>Dst</i>           | ILMN_2721385 | ILMN_211736 | 0.80 | 0.0037 |
| <i>Cisd1</i>         | ILMN_2706205 | ILMN_219251 | 0.80 | 0.0012 |
| <i>Mrpl1</i>         | ILMN_2711966 | ILMN_219665 | 0.80 | 0.0016 |

|                      |              |             |      |        |
|----------------------|--------------|-------------|------|--------|
| <i>Aoc3</i>          | ILMN_2625920 | ILMN_212395 | 0.79 | 0.0019 |
| <i>Pi16</i>          | ILMN_2669062 | ILMN_216258 | 0.79 | 0.0031 |
| <i>Tnnc1</i>         | ILMN_2503052 | ILMN_194064 | 0.79 | 0.0056 |
| <i>Nrp1</i>          | ILMN_1237197 | ILMN_214296 | 0.79 | 0.0017 |
| <i>Ubac1</i>         | ILMN_2431046 | ILMN_185910 | 0.79 | 0.0010 |
| <i>Cyp27a1</i>       | ILMN_2960114 | ILMN_211874 | 0.79 | 0.0018 |
| <i>Phlda3</i>        | ILMN_2628567 | ILMN_212624 | 0.79 | 0.0011 |
| <i>Sdhd</i>          | ILMN_1239143 | ILMN_209676 | 0.79 | 0.0040 |
| <i>Nampt</i>         | ILMN_2821850 | ILMN_212748 | 0.79 | 0.0018 |
| <i>Idh3a</i>         | ILMN_2740134 | ILMN_221774 | 0.79 | 0.0087 |
| <i>Scgb3a2</i>       | ILMN_2753867 | ILMN_222722 | 0.79 | 0.0002 |
| <i>Ndufb7</i>        | ILMN_2717460 | ILMN_220088 | 0.78 | 0.0010 |
| <i>Tsc22d3</i>       | ILMN_3150811 | ILMN_257708 | 0.77 | 0.0024 |
| <i>Atpaf2</i>        | ILMN_2601118 | ILMN_196566 | 0.77 | 0.0015 |
| <i>Rsph1</i>         | ILMN_2441534 | ILMN_187143 | 0.77 | 0.0000 |
| <i>Ndufa3</i>        | ILMN_2792560 | ILMN_261570 | 0.77 | 0.0002 |
| <i>Nrp1</i>          | ILMN_2669912 | ILMN_214296 | 0.77 | 0.0008 |
| <i>Hyal1</i>         | ILMN_2644375 | ILMN_214111 | 0.77 | 0.0016 |
| <i>Tspan3</i>        | ILMN_1232099 | ILMN_189492 | 0.76 | 0.0010 |
| <i>4833442J19Rik</i> | ILMN_3160574 | ILMN_214657 | 0.76 | 0.0098 |
| <i>Hmgcs2</i>        | ILMN_1216322 | ILMN_219260 | 0.76 | 0.0069 |
| <i>LOC100046918</i>  | ILMN_2699167 | ILMN_318141 | 0.76 | 0.0068 |
| <i>D430015B01Rik</i> | ILMN_1224427 | ILMN_254424 | 0.75 | 0.0078 |
| <i>Fmo1</i>          | ILMN_2838308 | ILMN_213755 | 0.75 | 0.0031 |
| <i>Fbxo31</i>        | ILMN_2687032 | ILMN_217743 | 0.75 | 0.0038 |
| <i>3300001G02Rik</i> | ILMN_2990229 | ILMN_240673 | 0.75 | 0.0057 |
| <i>Pex7</i>          | ILMN_2739118 | ILMN_221690 | 0.75 | 0.0025 |
| <i>Lias</i>          | ILMN_2743668 | ILMN_221016 | 0.75 | 0.0007 |
| <i>Serping1</i>      | ILMN_2913166 | ILMN_256713 | 0.75 | 0.0037 |
| <i>Etfdh</i>         | ILMN_2669804 | ILMN_216328 | 0.75 | 0.0073 |
| <i>Cycs</i>          | ILMN_3155380 | ILMN_223048 | 0.75 | 0.0038 |
| <i>Pcolce2</i>       | ILMN_2678421 | ILMN_211112 | 0.74 | 0.0089 |
| <i>BC028528</i>      | ILMN_2656422 | ILMN_215178 | 0.74 | 0.0035 |
| <i>Cxcl13</i>        | ILMN_2760019 | ILMN_223155 | 0.74 | 0.0090 |
| <i>Pgm2</i>          | ILMN_2788673 | ILMN_225618 | 0.74 | 0.0048 |
| <i>Coq6</i>          | ILMN_1229589 | ILMN_211735 | 0.74 | 0.0021 |
| <i>Esam1</i>         | ILMN_2690839 | ILMN_218041 | 0.74 | 0.0053 |
| <i>1810049H13Rik</i> | ILMN_2680665 | ILMN_217236 | 0.74 | 0.0019 |
| <i>Ndufa4</i>        | ILMN_2666061 | ILMN_215988 | 0.74 | 0.0018 |
| <i>Plin</i>          | ILMN_2687984 | ILMN_217822 | 0.74 | 0.0061 |
| <i>Aldh5a1</i>       | ILMN_2664660 | ILMN_246401 | 0.73 | 0.0066 |
| <i>D10Ert322e</i>    | ILMN_2727992 | ILMN_220871 | 0.73 | 0.0018 |
| <i>Rnf144a</i>       | ILMN_2678127 | ILMN_217013 | 0.73 | 0.0033 |
| <i>Arsa</i>          | ILMN_1225552 | ILMN_254441 | 0.73 | 0.0098 |
| <i>Ndufb3</i>        | ILMN_2734511 | ILMN_221363 | 0.73 | 0.0015 |
| <i>Gypc</i>          | ILMN_1218358 | ILMN_260598 | 0.73 | 0.0089 |
| <i>Acads</i>         | ILMN_2806676 | ILMN_210961 | 0.73 | 0.0030 |
| <i>Sftpd</i>         | ILMN_1244169 | ILMN_214890 | 0.73 | 0.0004 |
| <i>Cox11</i>         | ILMN_1247397 | ILMN_222359 | 0.72 | 0.0048 |
| <i>Mtch2</i>         | ILMN_1229238 | ILMN_210887 | 0.72 | 0.0076 |



|                          |              |             |      |        |
|--------------------------|--------------|-------------|------|--------|
| <i>Ednrb</i>             | ILMN_2589640 | ILMN_208799 | 0.72 | 0.0047 |
| <i>Sucla2</i>            | ILMN_2596942 | ILMN_241666 | 0.72 | 0.0079 |
| <i>Sepp1</i>             | ILMN_3141048 | ILMN_217349 | 0.72 | 0.0086 |
| <i>Lace1</i>             | ILMN_1231795 | ILMN_213918 | 0.72 | 0.0066 |
| <i>Igfbp6</i>            | ILMN_2689790 | ILMN_217958 | 0.72 | 0.0047 |
| <i>Reep6</i>             | ILMN_2634216 | ILMN_213154 | 0.72 | 0.0071 |
| <i>Hsd17b7</i>           | ILMN_1229529 | ILMN_216414 | 0.72 | 0.0037 |
| <i>Suclg1</i>            | ILMN_1216493 | ILMN_217480 | 0.71 | 0.0005 |
| <i>Agpat6</i>            | ILMN_1252335 | ILMN_213262 | 0.71 | 0.0024 |
| <i>Tpi1</i>              | ILMN_2932359 | ILMN_186788 | 0.71 | 0.0011 |
| <i>1810020D17Rik</i>     | ILMN_2896944 | ILMN_223656 | 0.71 | 0.0096 |
| <i>Cd300lg</i>           | ILMN_2688416 | ILMN_252644 | 0.71 | 0.0034 |
| <i>1700037H04Rik</i>     | ILMN_1213070 | ILMN_232254 | 0.71 | 0.0039 |
| <i>Sar1b</i>             | ILMN_2997998 | ILMN_219902 | 0.70 | 0.0090 |
| <i>Rilp</i>              | ILMN_1218228 | ILMN_226905 | 0.70 | 0.0065 |
| <i>9530058B02Rik</i>     | ILMN_2904819 | ILMN_209043 | 0.70 | 0.0082 |
| <i>OTTMUSG0000000971</i> | ILMN_2864309 | ILMN_244723 | 0.69 | 0.0017 |
| <i>Csda</i>              | ILMN_1234336 | ILMN_211098 | 0.69 | 0.0087 |
| <i>Dlst</i>              | ILMN_1237507 | ILMN_261671 | 0.69 | 0.0040 |
| <i>Hspe1</i>             | ILMN_2960308 | ILMN_213386 | 0.69 | 0.0010 |
| <i>Ramp2</i>             | ILMN_2661422 | ILMN_215597 | 0.69 | 0.0091 |
| <i>Mrps31</i>            | ILMN_2829295 | ILMN_220521 | 0.69 | 0.0011 |
| <i>Nt5e</i>              | ILMN_2813830 | ILMN_213360 | 0.69 | 0.0058 |
| <i>Coq5</i>              | ILMN_1257300 | ILMN_211122 | 0.69 | 0.0091 |
| <i>Hint3</i>             | ILMN_2757092 | ILMN_222943 | 0.69 | 0.0025 |
| <i>Cox6b1</i>            | ILMN_2616405 | ILMN_211493 | 0.68 | 0.0050 |
| <i>Gadd45b</i>           | ILMN_2900653 | ILMN_223355 | 0.68 | 0.0001 |
| <i>Rb1</i>               | ILMN_2861644 | ILMN_217149 | 0.68 | 0.0088 |
| <i>Grpel1</i>            | ILMN_2945806 | ILMN_216950 | 0.67 | 0.0080 |
| <i>Etfa</i>              | ILMN_2800655 | ILMN_214618 | 0.67 | 0.0078 |
| <i>Tgfbr3</i>            | ILMN_2789239 | ILMN_240795 | 0.67 | 0.0024 |
| <i>Pkn1</i>              | ILMN_2990872 | ILMN_256799 | 0.67 | 0.0032 |
| <i>Acadm</i>             | ILMN_2810473 | ILMN_227083 | 0.67 | 0.0047 |
| <i>Etfb</i>              | ILMN_3104414 | ILMN_212569 | 0.67 | 0.0019 |
| <i>Mrps31</i>            | ILMN_2732565 | ILMN_220521 | 0.67 | 0.0032 |
| <i>Nit2</i>              | ILMN_2681622 | ILMN_217299 | 0.67 | 0.0034 |
| <i>Gpd2</i>              | ILMN_1247257 | ILMN_214592 | 0.67 | 0.0082 |
| <i>LOC100047214</i>      | ILMN_1255556 | ILMN_313723 | 0.67 | 0.0073 |
| <i>Actc1</i>             | ILMN_2598916 | ILMN_209757 | 0.66 | 0.0000 |
| <i>2310007A19Rik</i>     | ILMN_1222196 | ILMN_227146 | 0.66 | 0.0032 |
| <i>Krt13</i>             | ILMN_2704972 | ILMN_230613 | 0.66 | 0.0000 |
| <i>Rhot2</i>             | ILMN_2740348 | ILMN_215732 | 0.66 | 0.0093 |
| <i>Mbnl1</i>             | ILMN_2766253 | ILMN_219259 | 0.66 | 0.0097 |
| <i>Ndufs4</i>            | ILMN_1234521 | ILMN_212301 | 0.66 | 0.0049 |
| <i>Clic5</i>             | ILMN_2677634 | ILMN_216973 | 0.66 | 0.0095 |
| <i>Rpl39l</i>            | ILMN_2684892 | ILMN_217567 | 0.65 | 0.0068 |
| <i>Pla2g7</i>            | ILMN_2692696 | ILMN_218184 | 0.65 | 0.0004 |
| <i>Apoc1</i>             | ILMN_2599794 | ILMN_208882 | 0.65 | 0.0071 |
| <i>Rmnd1</i>             | ILMN_2955535 | ILMN_209646 | 0.65 | 0.0042 |
| <i>Abcb1b</i>            | ILMN_2918499 | ILMN_212008 | 0.64 | 0.0025 |

|                      |              |             |       |        |
|----------------------|--------------|-------------|-------|--------|
| <i>Evc</i>           | ILMN_2706562 | ILMN_238803 | 0.64  | 0.0005 |
| <i>Uqcrc2</i>        | ILMN_2435140 | ILMN_186391 | 0.64  | 0.0050 |
| <i>LOC100048613</i>  | ILMN_2647188 | ILMN_311557 | 0.64  | 0.0090 |
| <i>Cox5a</i>         | ILMN_2682800 | ILMN_247252 | 0.64  | 0.0035 |
| <i>Krtdap</i>        | ILMN_2868152 | ILMN_237217 | 0.63  | 0.0000 |
| <i>Gpc3</i>          | ILMN_2719973 | ILMN_220269 | 0.63  | 0.0006 |
| <i>Uqcrh</i>         | ILMN_2512849 | ILMN_195130 | 0.62  | 0.0038 |
| <i>Vsig4</i>         | ILMN_1241350 | ILMN_187127 | 0.62  | 0.0001 |
| <i>LOC100047762</i>  | ILMN_1217043 | ILMN_319923 | 0.62  | 0.0011 |
| <i>Uck1</i>          | ILMN_1226366 | ILMN_189864 | 0.62  | 0.0034 |
| <i>Pknox2</i>        | ILMN_3135037 | ILMN_254436 | 0.61  | 0.0000 |
| <i>Sdhb</i>          | ILMN_2769065 | ILMN_209086 | 0.61  | 0.0093 |
| <i>Hamp2</i>         | ILMN_2852624 | ILMN_217466 | 0.61  | 0.0003 |
| <i>Mrps18b</i>       | ILMN_2865239 | ILMN_252778 | 0.61  | 0.0060 |
| <i>Mfn2</i>          | ILMN_2641278 | ILMN_213835 | 0.60  | 0.0057 |
| <i>GpnmB</i>         | ILMN_2648669 | ILMN_211323 | 0.58  | 0.0004 |
| <i>Tmem139</i>       | ILMN_2600822 | ILMN_209958 | -0.59 | 0.0001 |
| <i>Arhgef3</i>       | ILMN_2645208 | ILMN_214179 | -0.59 | 0.0084 |
| <i>Kcnk5</i>         | ILMN_1232263 | ILMN_218669 | -0.59 | 0.0003 |
| <i>Hist1h2ah</i>     | ILMN_2730329 | ILMN_196729 | -0.61 | 0.0029 |
| <i>Kcnj15</i>        | ILMN_3125966 | ILMN_233678 | -0.62 | 0.0012 |
| <i>Dyrk3</i>         | ILMN_2699522 | ILMN_258582 | -0.62 | 0.0031 |
| <i>Enpp1</i>         | ILMN_2782964 | ILMN_210635 | -0.62 | 0.0069 |
| <i>Ifi30</i>         | ILMN_2767918 | ILMN_216051 | -0.64 | 0.0007 |
| <i>Ren1</i>          | ILMN_2777226 | ILMN_242576 | -0.64 | 0.0098 |
| <i>Bach2</i>         | ILMN_2819558 | ILMN_223297 | -0.64 | 0.0003 |
| <i>Sh3tc2</i>        | ILMN_1240728 | ILMN_241633 | -0.65 | 0.0012 |
| <i>Prps2</i>         | ILMN_1234614 | ILMN_213601 | -0.65 | 0.0058 |
| <i>Rps4x</i>         | ILMN_2948086 | ILMN_233225 | -0.66 | 0.0061 |
| <i>Rims3</i>         | ILMN_2488599 | ILMN_192493 | -0.66 | 0.0010 |
| <i>Abcc3</i>         | ILMN_2685157 | ILMN_245663 | -0.66 | 0.0001 |
| <i>Erp29</i>         | ILMN_1239185 | ILMN_218519 | -0.66 | 0.0083 |
| <i>Ttpa</i>          | ILMN_2470983 | ILMN_190534 | -0.66 | 0.0009 |
| <i>Trib2</i>         | ILMN_2432550 | ILMN_186091 | -0.66 | 0.0082 |
| <i>Flvcr2</i>        | ILMN_1248190 | ILMN_222509 | -0.67 | 0.0002 |
| <i>Dnajc6</i>        | ILMN_1230224 | ILMN_247689 | -0.67 | 0.0073 |
| <i>2610528J11Rik</i> | ILMN_1221084 | ILMN_216824 | -0.67 | 0.0000 |
| <i>Epha1</i>         | ILMN_2972748 | ILMN_213132 | -0.67 | 0.0000 |
| <i>B3galt5</i>       | ILMN_1245509 | ILMN_221459 | -0.68 | 0.0063 |
| <i>Ch25h</i>         | ILMN_2702303 | ILMN_218948 | -0.68 | 0.0000 |
| <i>Slc9a3r2</i>      | ILMN_2710274 | ILMN_219545 | -0.68 | 0.0058 |
| <i>Eef1b2</i>        | ILMN_1229042 | ILMN_212511 | -0.69 | 0.0035 |
| <i>Pi4k2b</i>        | ILMN_3099758 | ILMN_207467 | -0.69 | 0.0021 |
| <i>Slc7a8</i>        | ILMN_2598877 | ILMN_209055 | -0.69 | 0.0077 |
| <i>Chad</i>          | ILMN_2659340 | ILMN_215425 | -0.69 | 0.0010 |
| <i>Cd44</i>          | ILMN_3114585 | ILMN_245439 | -0.69 | 0.0001 |
| <i>Adh1</i>          | ILMN_2850077 | ILMN_214816 | -0.70 | 0.0070 |
| <i>Tlr1</i>          | ILMN_1236908 | ILMN_220747 | -0.70 | 0.0000 |
| <i>Litaf</i>         | ILMN_2665490 | ILMN_238658 | -0.70 | 0.0030 |
| <i>D14Ertd668e</i>   | ILMN_2827780 | ILMN_217565 | -0.70 | 0.0012 |

|                      |              |             |       |        |
|----------------------|--------------|-------------|-------|--------|
| <i>Ndfip2</i>        | ILMN_1247636 | ILMN_219034 | -0.70 | 0.0098 |
| <i>B3gnt5</i>        | ILMN_1216368 | ILMN_222923 | -0.70 | 0.0000 |
| <i>Prr15</i>         | ILMN_2649456 | ILMN_214576 | -0.71 | 0.0003 |
| <i>Lcn2</i>          | ILMN_2712075 | ILMN_219674 | -0.71 | 0.0061 |
| <i>Zfx3</i>          | ILMN_2623793 | ILMN_249194 | -0.71 | 0.0034 |
| <i>Ndst1</i>         | ILMN_2832641 | ILMN_253710 | -0.71 | 0.0022 |
| <i>Rps8</i>          | ILMN_1234590 | ILMN_218934 | -0.72 | 0.0026 |
| <i>Rerg</i>          | ILMN_1230648 | ILMN_212208 | -0.72 | 0.0001 |
| <i>Echdc2</i>        | ILMN_2846194 | ILMN_211203 | -0.72 | 0.0039 |
| <i>Slc31a1</i>       | ILMN_1254437 | ILMN_221784 | -0.72 | 0.0072 |
| <i>Hs3st1</i>        | ILMN_1253182 | ILMN_209971 | -0.73 | 0.0076 |
| <i>Dgka</i>          | ILMN_2940446 | ILMN_215394 | -0.73 | 0.0081 |
| <i>Psat1</i>         | ILMN_1221048 | ILMN_253395 | -0.73 | 0.0022 |
| <i>Luzp1</i>         | ILMN_2942276 | ILMN_209553 | -0.74 | 0.0045 |
| <i>Pdk3</i>          | ILMN_2676876 | ILMN_216915 | -0.74 | 0.0000 |
| <i>Upb1</i>          | ILMN_2516705 | ILMN_192546 | -0.74 | 0.0000 |
| <i>BC030476</i>      | ILMN_2819380 | ILMN_209600 | -0.74 | 0.0035 |
| <i>Spint1</i>        | ILMN_2621463 | ILMN_227593 | -0.75 | 0.0016 |
| <i>Sh3bgrl3</i>      | ILMN_2625351 | ILMN_212344 | -0.75 | 0.0087 |
| <i>Rps26</i>         | ILMN_2794676 | ILMN_234107 | -0.75 | 0.0010 |
| <i>Tegt</i>          | ILMN_2697248 | ILMN_218556 | -0.75 | 0.0026 |
| <i>Sphk1</i>         | ILMN_1232884 | ILMN_255350 | -0.76 | 0.0002 |
| <i>Tjp2</i>          | ILMN_1256328 | ILMN_249962 | -0.76 | 0.0049 |
| <i>Ywhaz</i>         | ILMN_2952914 | ILMN_188261 | -0.76 | 0.0035 |
| <i>AI661453</i>      | ILMN_2830520 | ILMN_214565 | -0.76 | 0.0001 |
| <i>Rin2</i>          | ILMN_2663196 | ILMN_215751 | -0.77 | 0.0051 |
| <i>Cttnal1</i>       | ILMN_1232261 | ILMN_214433 | -0.78 | 0.0056 |
| <i>Stx3</i>          | ILMN_3162879 | ILMN_258475 | -0.78 | 0.0001 |
| <i>Fkbp4</i>         | ILMN_1257428 | ILMN_232691 | -0.78 | 0.0038 |
| <i>Slc13a2</i>       | ILMN_2646369 | ILMN_214285 | -0.79 | 0.0000 |
| <i>Syvn1</i>         | ILMN_2628258 | ILMN_212597 | -0.79 | 0.0042 |
| <i>Gcnt1</i>         | ILMN_2672297 | ILMN_214513 | -0.79 | 0.0002 |
| <i>Gna14</i>         | ILMN_2597778 | ILMN_209643 | -0.79 | 0.0001 |
| <i>Ldb1</i>          | ILMN_2601907 | ILMN_210069 | -0.79 | 0.0004 |
| <i>Hsp90b1</i>       | ILMN_2504433 | ILMN_194217 | -0.79 | 0.0028 |
| <i>6330505N24Rik</i> | ILMN_1220688 | ILMN_230010 | -0.79 | 0.0043 |
| <i>Elmo1</i>         | ILMN_2658407 | ILMN_215345 | -0.80 | 0.0050 |
| <i>Mtap7</i>         | ILMN_1252545 | ILMN_245164 | -0.80 | 0.0026 |
| <i>Cd27</i>          | ILMN_3128992 | ILMN_230311 | -0.80 | 0.0064 |
| <i>Rnasek</i>        | ILMN_2593134 | ILMN_209163 | -0.81 | 0.0005 |
| <i>Rpl12</i>         | ILMN_2874228 | ILMN_232095 | -0.81 | 0.0004 |
| <i>Kcnk6</i>         | ILMN_3049650 | ILMN_240136 | -0.81 | 0.0027 |
| <i>Cds1</i>          | ILMN_2919860 | ILMN_215908 | -0.82 | 0.0011 |
| <i>Dusp6</i>         | ILMN_2925711 | ILMN_213741 | -0.82 | 0.0006 |
| <i>C430004E15Rik</i> | ILMN_2625047 | ILMN_212315 | -0.82 | 0.0086 |
| <i>Hist1h2an</i>     | ILMN_1248830 | ILMN_214020 | -0.82 | 0.0095 |
| <i>Bcl2l2</i>        | ILMN_2936517 | ILMN_210038 | -0.82 | 0.0052 |
| <i>Tmem117</i>       | ILMN_2692733 | ILMN_218190 | -0.82 | 0.0016 |
| <i>Mapre2</i>        | ILMN_1229743 | ILMN_217280 | -0.83 | 0.0008 |
| <i>Gas6</i>          | ILMN_2686327 | ILMN_217682 | -0.83 | 0.0021 |

|                      |              |             |       |        |
|----------------------|--------------|-------------|-------|--------|
| <i>Upb1</i>          | ILMN_2870786 | ILMN_192546 | -0.83 | 0.0000 |
| <i>Sorl1</i>         | ILMN_1249578 | ILMN_224800 | -0.84 | 0.0031 |
| <i>Qsox1</i>         | ILMN_1239077 | ILMN_251363 | -0.84 | 0.0000 |
| <i>Pdzk1ip1</i>      | ILMN_2618935 | ILMN_211728 | -0.84 | 0.0017 |
| <i>Add3</i>          | ILMN_2588671 | ILMN_208695 | -0.84 | 0.0002 |
| <i>Dgkz</i>          | ILMN_2915059 | ILMN_210741 | -0.84 | 0.0085 |
| <i>Mcfd2</i>         | ILMN_3111298 | ILMN_250390 | -0.85 | 0.0002 |
| <i>2810022L02Rik</i> | ILMN_2673917 | ILMN_214243 | -0.85 | 0.0004 |
| <i>Lgals3</i>        | ILMN_1223317 | ILMN_222956 | -0.85 | 0.0001 |
| <i>Sdc4</i>          | ILMN_2728729 | ILMN_220929 | -0.86 | 0.0018 |
| <i>Irx3</i>          | ILMN_2776909 | ILMN_224225 | -0.86 | 0.0012 |
| <i>Stap1</i>         | ILMN_2719803 | ILMN_220254 | -0.86 | 0.0000 |
| <i>Sfi1</i>          | ILMN_1256699 | ILMN_220674 | -0.86 | 0.0022 |
| <i>Enpp1</i>         | ILMN_1231851 | ILMN_210635 | -0.87 | 0.0009 |
| <i>Hist2h2ac</i>     | ILMN_1218380 | ILMN_233024 | -0.87 | 0.0006 |
| <i>Col18a1</i>       | ILMN_2735184 | ILMN_221410 | -0.87 | 0.0073 |
| <i>Ephx1</i>         | ILMN_2664224 | ILMN_215839 | -0.88 | 0.0008 |
| <i>Smpd13a</i>       | ILMN_1224116 | ILMN_209738 | -0.88 | 0.0007 |
| <i>Ttr</i>           | ILMN_2443330 | ILMN_187347 | -0.88 | 0.0000 |
| <i>Pkp2</i>          | ILMN_2927565 | ILMN_213446 | -0.88 | 0.0063 |
| <i>Atp13a4</i>       | ILMN_2721169 | ILMN_236723 | -0.88 | 0.0000 |
| <i>Zfhx3</i>         | ILMN_1250928 | ILMN_249194 | -0.88 | 0.0036 |
| <i>1700027N10Rik</i> | ILMN_2935237 | ILMN_242897 | -0.89 | 0.0001 |
| <i>Il17re</i>        | ILMN_2634933 | ILMN_213228 | -0.89 | 0.0001 |
| <i>Cdc42se1</i>      | ILMN_1259946 | ILMN_219464 | -0.89 | 0.0003 |
| <i>Centg2</i>        | ILMN_3086136 | ILMN_224681 | -0.90 | 0.0007 |
| <i>Slc44a4</i>       | ILMN_2970023 | ILMN_209371 | -0.90 | 0.0000 |
| <i>Gcnt1</i>         | ILMN_1256299 | ILMN_214513 | -0.91 | 0.0087 |
| <i>Wwc1</i>          | ILMN_2898637 | ILMN_229795 | -0.91 | 0.0000 |
| <i>Gnptg</i>         | ILMN_2617865 | ILMN_208722 | -0.91 | 0.0068 |
| <i>Ass1</i>          | ILMN_1247811 | ILMN_216093 | -0.91 | 0.0005 |
| <i>Ccnd1</i>         | ILMN_2601471 | ILMN_210028 | -0.91 | 0.0002 |
| <i>Slc16a6</i>       | ILMN_1258950 | ILMN_233199 | -0.91 | 0.0005 |
| <i>Tpm1</i>          | ILMN_3007072 | ILMN_241818 | -0.91 | 0.0005 |
| <i>Ralbp1</i>        | ILMN_1231228 | ILMN_217172 | -0.91 | 0.0098 |
| <i>Ddx26b</i>        | ILMN_1224487 | ILMN_215260 | -0.92 | 0.0009 |
| <i>Ccnd1</i>         | ILMN_1221503 | ILMN_210028 | -0.92 | 0.0019 |
| <i>Prlr</i>          | ILMN_2868699 | ILMN_210332 | -0.92 | 0.0000 |
| <i>Pglyrp1</i>       | ILMN_2592486 | ILMN_209096 | -0.93 | 0.0000 |
| <i>Itpr3</i>         | ILMN_1228385 | ILMN_220408 | -0.93 | 0.0000 |
| <i>Ctage5</i>        | ILMN_2645138 | ILMN_199381 | -0.93 | 0.0051 |
| <i>Osgin1</i>        | ILMN_2645780 | ILMN_214233 | -0.93 | 0.0000 |
| <i>5830467P10Rik</i> | ILMN_1234099 | ILMN_213543 | -0.94 | 0.0000 |
| <i>Mark2</i>         | ILMN_2689887 | ILMN_250718 | -0.94 | 0.0004 |
| <i>Frk</i>           | ILMN_2615513 | ILMN_211404 | -0.94 | 0.0000 |
| <i>Plekhg3</i>       | ILMN_1221920 | ILMN_222207 | -0.94 | 0.0002 |
| <i>Slc2a1</i>        | ILMN_1258159 | ILMN_215238 | -0.94 | 0.0007 |
| <i>Apof</i>          | ILMN_2644185 | ILMN_214094 | -0.94 | 0.0000 |
| <i>Coch</i>          | ILMN_2919201 | ILMN_222845 | -0.95 | 0.0000 |
| <i>Tmigd1</i>        | ILMN_1220817 | ILMN_216690 | -0.96 | 0.0000 |

|                      |              |             |       |        |
|----------------------|--------------|-------------|-------|--------|
| <i>Spon2</i>         | ILMN_1229547 | ILMN_223108 | -0.96 | 0.0023 |
| <i>Abca3</i>         | ILMN_3150233 | ILMN_241076 | -0.96 | 0.0005 |
| <i>Dgka</i>          | ILMN_2658961 | ILMN_215394 | -0.96 | 0.0031 |
| <i>Trim2</i>         | ILMN_2511355 | ILMN_187599 | -0.97 | 0.0024 |
| <i>LOC100045542</i>  | ILMN_1230893 | ILMN_317147 | -0.98 | 0.0007 |
| <i>Ppfibp2</i>       | ILMN_2964841 | ILMN_223154 | -0.98 | 0.0001 |
| <i>6430527G18Rik</i> | ILMN_3109491 | ILMN_230817 | -0.98 | 0.0013 |
| <i>Ptpre</i>         | ILMN_1254630 | ILMN_215063 | -0.98 | 0.0003 |
| <i>Nup210</i>        | ILMN_1257579 | ILMN_211743 | -0.99 | 0.0082 |
| <i>Vps37b</i>        | ILMN_2681670 | ILMN_217304 | -0.99 | 0.0074 |
| <i>Scamp2</i>        | ILMN_1226985 | ILMN_219369 | -1.00 | 0.0000 |
| <i>Cd24a</i>         | ILMN_1237868 | ILMN_220466 | -1.00 | 0.0001 |
| <i>Mfsd10</i>        | ILMN_1252243 | ILMN_214166 | -1.00 | 0.0001 |
| <i>Adamts2</i>       | ILMN_1226259 | ILMN_210818 | -1.00 | 0.0021 |
| <i>Hist2h3c1</i>     | ILMN_3136540 | ILMN_227824 | -1.01 | 0.0006 |
| <i>D14Ert449e</i>    | ILMN_2693858 | ILMN_243465 | -1.01 | 0.0001 |
| <i>Dnase1</i>        | ILMN_2734251 | ILMN_214587 | -1.02 | 0.0000 |
| <i>Tbc1d8</i>        | ILMN_1255779 | ILMN_259676 | -1.02 | 0.0080 |
| <i>St3gal1</i>       | ILMN_1224619 | ILMN_244745 | -1.02 | 0.0000 |
| <i>2310008M10Rik</i> | ILMN_2904961 | ILMN_213855 | -1.02 | 0.0001 |
| <i>Ripk4</i>         | ILMN_2840856 | ILMN_231082 | -1.02 | 0.0006 |
| <i>Ppap2c</i>        | ILMN_3003631 | ILMN_240291 | -1.03 | 0.0001 |
| <i>Pkp2</i>          | ILMN_2665948 | ILMN_213446 | -1.03 | 0.0086 |
| <i>Cldn1</i>         | ILMN_2870295 | ILMN_219513 | -1.03 | 0.0000 |
| <i>Trim8</i>         | ILMN_2782503 | ILMN_185225 | -1.03 | 0.0003 |
| <i>Slc46a3</i>       | ILMN_2627733 | ILMN_212552 | -1.03 | 0.0000 |
| <i>Hist1h2ao</i>     | ILMN_2836654 | ILMN_196731 | -1.03 | 0.0000 |
| <i>Stard10</i>       | ILMN_2759762 | ILMN_212367 | -1.03 | 0.0017 |
| <i>Mif</i>           | ILMN_2867835 | ILMN_207449 | -1.04 | 0.0000 |
| <i>Slc5a1</i>        | ILMN_2715270 | ILMN_260913 | -1.05 | 0.0000 |
| <i>Pi4k2b</i>        | ILMN_2627217 | ILMN_207467 | -1.05 | 0.0009 |
| <i>4930504E06Rik</i> | ILMN_1237664 | ILMN_212829 | -1.06 | 0.0005 |
| <i>Cx3cl1</i>        | ILMN_2627041 | ILMN_212491 | -1.06 | 0.0001 |
| <i>Alcam</i>         | ILMN_2606804 | ILMN_249460 | -1.06 | 0.0004 |
| <i>Abhd14b</i>       | ILMN_3007862 | ILMN_246267 | -1.06 | 0.0000 |
| <i>Sel1l</i>         | ILMN_1244431 | ILMN_258443 | -1.06 | 0.0001 |
| <i>Clec2d</i>        | ILMN_2603647 | ILMN_210243 | -1.07 | 0.0000 |
| <i>Plcg2</i>         | ILMN_2601833 | ILMN_210061 | -1.07 | 0.0000 |
| <i>Atpif1</i>        | ILMN_1250068 | ILMN_217464 | -1.07 | 0.0001 |
| <i>Sel1l</i>         | ILMN_3137920 | ILMN_258443 | -1.07 | 0.0000 |
| <i>Copz2</i>         | ILMN_2647028 | ILMN_214342 | -1.08 | 0.0000 |
| <i>Atp8b1</i>        | ILMN_2977129 | ILMN_245949 | -1.08 | 0.0000 |
| <i>Cd63</i>          | ILMN_3128907 | ILMN_214933 | -1.08 | 0.0000 |
| <i>Rapgef3</i>       | ILMN_1256335 | ILMN_213815 | -1.08 | 0.0001 |
| <i>Il28ra</i>        | ILMN_2653328 | ILMN_213007 | -1.09 | 0.0001 |
| <i>Arhgef19</i>      | ILMN_1212875 | ILMN_219605 | -1.09 | 0.0045 |
| <i>Gnmt</i>          | ILMN_2837816 | ILMN_215974 | -1.09 | 0.0058 |
| <i>Copz2</i>         | ILMN_2878274 | ILMN_214342 | -1.09 | 0.0000 |
| <i>Celsr1</i>        | ILMN_1235423 | ILMN_219113 | -1.09 | 0.0000 |
| <i>H3f3b</i>         | ILMN_2648292 | ILMN_214469 | -1.10 | 0.0000 |

|                      |              |             |       |        |
|----------------------|--------------|-------------|-------|--------|
| <i>Hist2h3b</i>      | ILMN_2934120 | ILMN_253111 | -1.10 | 0.0003 |
| <i>LOC100044475</i>  | ILMN_2596917 | ILMN_312482 | -1.11 | 0.0002 |
| <i>Pycr2</i>         | ILMN_2998548 | ILMN_215594 | -1.11 | 0.0000 |
| <i>Faah</i>          | ILMN_2766930 | ILMN_215313 | -1.11 | 0.0000 |
| <i>Tcf19</i>         | ILMN_2624827 | ILMN_212294 | -1.11 | 0.0000 |
| <i>Serpib6a</i>      | ILMN_1250279 | ILMN_239826 | -1.11 | 0.0000 |
| <i>Tpd52l1</i>       | ILMN_2434472 | ILMN_185695 | -1.12 | 0.0000 |
| <i>Lad1</i>          | ILMN_1227260 | ILMN_217597 | -1.12 | 0.0000 |
| <i>Galnt3</i>        | ILMN_1254361 | ILMN_246654 | -1.12 | 0.0000 |
| <i>Tspan8</i>        | ILMN_1220261 | ILMN_194091 | -1.13 | 0.0001 |
| <i>Cmtm7</i>         | ILMN_2648409 | ILMN_214480 | -1.13 | 0.0007 |
| <i>Cd63</i>          | ILMN_2653617 | ILMN_214933 | -1.13 | 0.0003 |
| <i>Tmem16a</i>       | ILMN_2645341 | ILMN_214193 | -1.13 | 0.0017 |
| <i>Scamp1</i>        | ILMN_2706853 | ILMN_253931 | -1.14 | 0.0000 |
| <i>Gpx2</i>          | ILMN_2674483 | ILMN_216720 | -1.14 | 0.0001 |
| <i>D4Bwg0951e</i>    | ILMN_2646296 | ILMN_214279 | -1.15 | 0.0024 |
| <i>Tmem183a</i>      | ILMN_2667441 | ILMN_249013 | -1.15 | 0.0080 |
| <i>Igsf3</i>         | ILMN_1229553 | ILMN_229190 | -1.15 | 0.0002 |
| <i>Pak4</i>          | ILMN_2640570 | ILMN_213768 | -1.16 | 0.0001 |
| <i>Tmem125</i>       | ILMN_2703138 | ILMN_219015 | -1.16 | 0.0000 |
| <i>Bik</i>           | ILMN_2717011 | ILMN_220051 | -1.16 | 0.0009 |
| <i>Folr1</i>         | ILMN_3000679 | ILMN_219347 | -1.16 | 0.0000 |
| <i>Elovl1</i>        | ILMN_3143506 | ILMN_252169 | -1.16 | 0.0000 |
| <i>Csrp1</i>         | ILMN_1260378 | ILMN_211706 | -1.16 | 0.0000 |
| <i>Tcn2</i>          | ILMN_1221787 | ILMN_209382 | -1.18 | 0.0002 |
| <i>Pip4k2c</i>       | ILMN_2696191 | ILMN_218465 | -1.18 | 0.0000 |
| <i>Lmo2</i>          | ILMN_2767605 | ILMN_223680 | -1.19 | 0.0000 |
| <i>9130005N14Rik</i> | ILMN_1217235 | ILMN_211732 | -1.19 | 0.0000 |
| <i>0610040J01Rik</i> | ILMN_2915716 | ILMN_209810 | -1.19 | 0.0000 |
| <i>Pam</i>           | ILMN_2626294 | ILMN_212425 | -1.19 | 0.0000 |
| <i>LOC100047173</i>  | ILMN_2651054 | ILMN_312499 | -1.20 | 0.0038 |
| <i>Dsg2</i>          | ILMN_1242566 | ILMN_245162 | -1.20 | 0.0000 |
| <i>Smap2</i>         | ILMN_3120652 | ILMN_213072 | -1.20 | 0.0000 |
| <i>Ngfrap1</i>       | ILMN_2943599 | ILMN_211730 | -1.22 | 0.0001 |
| <i>Ildr1</i>         | ILMN_2734693 | ILMN_219794 | -1.22 | 0.0000 |
| <i>Creld2</i>        | ILMN_2983948 | ILMN_222963 | -1.22 | 0.0018 |
| <i>Serpib1a</i>      | ILMN_1231573 | ILMN_218572 | -1.23 | 0.0000 |
| <i>Asns</i>          | ILMN_3006123 | ILMN_213406 | -1.23 | 0.0000 |
| <i>Dpp4</i>          | ILMN_2615096 | ILMN_211363 | -1.23 | 0.0036 |
| <i>Pdlim1</i>        | ILMN_1234072 | ILMN_253907 | -1.23 | 0.0036 |
| <i>Rbm47</i>         | ILMN_2720836 | ILMN_218273 | -1.23 | 0.0000 |
| <i>Tpd52l1</i>       | ILMN_1249224 | ILMN_185695 | -1.24 | 0.0000 |
| <i>Pafah1b3</i>      | ILMN_2640971 | ILMN_213804 | -1.24 | 0.0009 |
| <i>Cmtm8</i>         | ILMN_1249046 | ILMN_211784 | -1.24 | 0.0000 |
| <i>Usp54</i>         | ILMN_2418324 | ILMN_184400 | -1.25 | 0.0002 |
| <i>LOC100046232</i>  | ILMN_2595732 | ILMN_310357 | -1.25 | 0.0000 |
| <i>Tuba6</i>         | ILMN_2476139 | ILMN_191105 | -1.25 | 0.0000 |
| <i>Ankrd56</i>       | ILMN_2946760 | ILMN_221648 | -1.26 | 0.0000 |
| <i>Tceal8</i>        | ILMN_2861493 | ILMN_223469 | -1.26 | 0.0008 |
| <i>Arg1</i>          | ILMN_2952275 | ILMN_255007 | -1.26 | 0.0000 |

|                      |              |             |       |        |
|----------------------|--------------|-------------|-------|--------|
| <i>Pq1c1</i>         | ILMN_2592266 | ILMN_209073 | -1.27 | 0.0000 |
| <i>Hn1</i>           | ILMN_2758452 | ILMN_223034 | -1.27 | 0.0000 |
| <i>Serpinb6b</i>     | ILMN_2611755 | ILMN_211031 | -1.27 | 0.0002 |
| <i>Ctsh</i>          | ILMN_2872058 | ILMN_241653 | -1.28 | 0.0000 |
| <i>Ccdc68</i>        | ILMN_2929572 | ILMN_223560 | -1.29 | 0.0000 |
| <i>Slc7a4</i>        | ILMN_2639360 | ILMN_229227 | -1.29 | 0.0000 |
| <i>Cmtm7</i>         | ILMN_1233809 | ILMN_214480 | -1.31 | 0.0000 |
| <i>Crip2</i>         | ILMN_2710449 | ILMN_219558 | -1.31 | 0.0000 |
| <i>C230093N12Rik</i> | ILMN_1225348 | ILMN_217458 | -1.31 | 0.0000 |
| <i>Sh3yl1</i>        | ILMN_1237964 | ILMN_220343 | -1.31 | 0.0001 |
| <i>Hn1</i>           | ILMN_2914744 | ILMN_223034 | -1.31 | 0.0000 |
| <i>Socs2</i>         | ILMN_2628178 | ILMN_212590 | -1.32 | 0.0000 |
| <i>Asns</i>          | ILMN_2643513 | ILMN_213406 | -1.32 | 0.0000 |
| <i>Lrrc1</i>         | ILMN_2868459 | ILMN_219669 | -1.32 | 0.0000 |
| <i>Myh11</i>         | ILMN_2622217 | ILMN_212053 | -1.33 | 0.0000 |
| <i>Xbp1</i>          | ILMN_2431237 | ILMN_185934 | -1.33 | 0.0000 |
| <i>Stx7</i>          | ILMN_2645255 | ILMN_214183 | -1.34 | 0.0000 |
| <i>Liph</i>          | ILMN_2760434 | ILMN_217708 | -1.34 | 0.0000 |
| <i>Ddah1</i>         | ILMN_1256676 | ILMN_195643 | -1.34 | 0.0000 |
| <i>Papss1</i>        | ILMN_2594477 | ILMN_209301 | -1.34 | 0.0008 |
| <i>Acot1</i>         | ILMN_3139875 | ILMN_223756 | -1.35 | 0.0000 |
| <i>Hmgn3</i>         | ILMN_2644719 | ILMN_235659 | -1.35 | 0.0000 |
| <i>Nrip3</i>         | ILMN_2875404 | ILMN_217092 | -1.37 | 0.0000 |
| <i>Ceacam1</i>       | ILMN_3126609 | ILMN_250809 | -1.38 | 0.0000 |
| <i>Rnase1</i>        | ILMN_1220763 | ILMN_223373 | -1.39 | 0.0000 |
| <i>Gmds</i>          | ILMN_2766596 | ILMN_223617 | -1.40 | 0.0004 |
| <i>Pabpc1</i>        | ILMN_1259482 | ILMN_201529 | -1.40 | 0.0000 |
| <i>Pdlim4</i>        | ILMN_2606162 | ILMN_210491 | -1.41 | 0.0000 |
| <i>Plip</i>          | ILMN_1249529 | ILMN_249550 | -1.41 | 0.0000 |
| <i>Tmem51</i>        | ILMN_2589741 | ILMN_208808 | -1.42 | 0.0000 |
| <i>Rab4a</i>         | ILMN_1212902 | ILMN_223403 | -1.43 | 0.0000 |
| <i>Def6</i>          | ILMN_2595842 | ILMN_209446 | -1.43 | 0.0000 |
| <i>Nudt22</i>        | ILMN_1227723 | ILMN_218008 | -1.43 | 0.0000 |
| <i>Spcs3</i>         | ILMN_2787085 | ILMN_240413 | -1.44 | 0.0025 |
| <i>Tcfap2b</i>       | ILMN_3151298 | ILMN_238889 | -1.45 | 0.0000 |
| <i>Ddr1</i>          | ILMN_2713898 | ILMN_219438 | -1.45 | 0.0000 |
| <i>Meis2</i>         | ILMN_2850391 | ILMN_254922 | -1.45 | 0.0000 |
| <i>Elf3</i>          | ILMN_2850233 | ILMN_212003 | -1.45 | 0.0000 |
| <i>Rasgrp1</i>       | ILMN_1246609 | ILMN_208941 | -1.46 | 0.0000 |
| <i>Tgfb2</i>         | ILMN_1225196 | ILMN_247901 | -1.46 | 0.0000 |
| <i>Aass</i>          | ILMN_2644092 | ILMN_214085 | -1.46 | 0.0000 |
| <i>Anpep</i>         | ILMN_2589651 | ILMN_208800 | -1.46 | 0.0001 |
| <i>Papss1</i>        | ILMN_2859978 | ILMN_209301 | -1.46 | 0.0000 |
| <i>Gltp</i>          | ILMN_2971816 | ILMN_208899 | -1.47 | 0.0000 |
| <i>Cmtm8</i>         | ILMN_2801427 | ILMN_211784 | -1.48 | 0.0001 |
| <i>Rnf208</i>        | ILMN_2636349 | ILMN_213366 | -1.48 | 0.0000 |
| <i>Hmgn3</i>         | ILMN_1247704 | ILMN_214141 | -1.49 | 0.0000 |
| <i>Dstn</i>          | ILMN_2801683 | ILMN_221304 | -1.49 | 0.0000 |
| <i>Rab3d</i>         | ILMN_2588737 | ILMN_208703 | -1.51 | 0.0000 |
| <i>Slc9a3r1</i>      | ILMN_1240256 | ILMN_212760 | -1.51 | 0.0000 |

|                      |              |             |       |        |
|----------------------|--------------|-------------|-------|--------|
| <i>C130090K23Rik</i> | ILMN_3163255 | ILMN_209707 | -1.51 | 0.0000 |
| <i>Pml</i>           | ILMN_2732576 | ILMN_249462 | -1.51 | 0.0000 |
| <i>AU040829</i>      | ILMN_2702434 | ILMN_218962 | -1.51 | 0.0000 |
| <i>3110043J09Rik</i> | ILMN_1228093 | ILMN_252216 | -1.52 | 0.0000 |
| <i>LOC100047634</i>  | ILMN_1215644 | ILMN_309955 | -1.52 | 0.0000 |
| <i>Capn5</i>         | ILMN_2627566 | ILMN_212539 | -1.53 | 0.0000 |
| <i>Elmo3</i>         | ILMN_1219244 | ILMN_218257 | -1.53 | 0.0008 |
| <i>Soat1</i>         | ILMN_1248510 | ILMN_259411 | -1.53 | 0.0001 |
| <i>Galnt10</i>       | ILMN_2750011 | ILMN_212503 | -1.53 | 0.0008 |
| <i>Prkcd</i>         | ILMN_1245750 | ILMN_214910 | -1.54 | 0.0000 |
| <i>Lxn</i>           | ILMN_2694275 | ILMN_218315 | -1.54 | 0.0001 |
| <i>Sgpp1</i>         | ILMN_2877165 | ILMN_214520 | -1.55 | 0.0000 |
| <i>Es22</i>          | ILMN_2627528 | ILMN_212535 | -1.56 | 0.0000 |
| <i>Folr1</i>         | ILMN_2707541 | ILMN_219347 | -1.56 | 0.0000 |
| <i>Scnn1a</i>        | ILMN_2729607 | ILMN_220993 | -1.57 | 0.0000 |
| <i>Tcfap2b</i>       | ILMN_2760450 | ILMN_217594 | -1.59 | 0.0000 |
| <i>Sec11c</i>        | ILMN_1221592 | ILMN_216361 | -1.59 | 0.0000 |
| <i>Cd82</i>          | ILMN_2747196 | ILMN_222273 | -1.59 | 0.0000 |
| <i>Mup1</i>          | ILMN_2875730 | ILMN_240932 | -1.59 | 0.0000 |
| <i>Fnbp1l</i>        | ILMN_2746132 | ILMN_222193 | -1.59 | 0.0000 |
| <i>Kcnj16</i>        | ILMN_2613284 | ILMN_211173 | -1.60 | 0.0000 |
| <i>Llg12</i>         | ILMN_1224093 | ILMN_223065 | -1.60 | 0.0000 |
| <i>6430548M08Rik</i> | ILMN_2599214 | ILMN_188148 | -1.60 | 0.0000 |
| <i>LOC100046781</i>  | ILMN_2727598 | ILMN_313837 | -1.60 | 0.0099 |
| <i>Ccdc120</i>       | ILMN_2672543 | ILMN_216562 | -1.60 | 0.0000 |
| <i>App</i>           | ILMN_2597532 | ILMN_209617 | -1.61 | 0.0000 |
| <i>Cftr</i>          | ILMN_1259577 | ILMN_215935 | -1.61 | 0.0000 |
| <i>Gytl1b</i>        | ILMN_2988849 | ILMN_216242 | -1.62 | 0.0000 |
| <i>Eps8l2</i>        | ILMN_2821263 | ILMN_212969 | -1.62 | 0.0000 |
| <i>Atad4</i>         | ILMN_1246558 | ILMN_258414 | -1.63 | 0.0000 |
| <i>Lamb3</i>         | ILMN_2605512 | ILMN_210428 | -1.63 | 0.0000 |
| <i>C130026I21Rik</i> | ILMN_3162925 | ILMN_317869 | -1.63 | 0.0000 |
| <i>Cish</i>          | ILMN_2718330 | ILMN_220158 | -1.64 | 0.0000 |
| <i>LOC100046781</i>  | ILMN_1249142 | ILMN_313837 | -1.64 | 0.0002 |
| <i>1110003E01Rik</i> | ILMN_1225158 | ILMN_215508 | -1.65 | 0.0000 |
| <i>App12</i>         | ILMN_1219978 | ILMN_220140 | -1.67 | 0.0000 |
| <i>Ica1</i>          | ILMN_1245768 | ILMN_217379 | -1.69 | 0.0000 |
| <i>Wtip</i>          | ILMN_2424268 | ILMN_225883 | -1.69 | 0.0000 |
| <i>Ngfr</i>          | ILMN_2851288 | ILMN_246045 | -1.69 | 0.0000 |
| <i>Alox12</i>        | ILMN_2613908 | ILMN_211240 | -1.70 | 0.0000 |
| <i>Man2b1</i>        | ILMN_2707967 | ILMN_246706 | -1.70 | 0.0000 |
| <i>Edem2</i>         | ILMN_2684279 | ILMN_226722 | -1.71 | 0.0000 |
| <i>St3gal4</i>       | ILMN_2935870 | ILMN_213622 | -1.72 | 0.0000 |
| <i>Nedd9</i>         | ILMN_1223678 | ILMN_211969 | -1.72 | 0.0000 |
| <i>Adcy8</i>         | ILMN_2607127 | ILMN_210586 | -1.72 | 0.0000 |
| <i>Prss8</i>         | ILMN_2846148 | ILMN_221829 | -1.73 | 0.0000 |
| <i>Fpgs</i>          | ILMN_2870443 | ILMN_221380 | -1.73 | 0.0000 |
| <i>Klf5</i>          | ILMN_1253387 | ILMN_236003 | -1.73 | 0.0000 |
| <i>Cobl</i>          | ILMN_2951682 | ILMN_255747 | -1.73 | 0.0000 |
| <i>Krt17</i>         | ILMN_2661214 | ILMN_215576 | -1.74 | 0.0000 |



|                      |              |             |       |        |
|----------------------|--------------|-------------|-------|--------|
| <i>Rab25</i>         | ILMN_2781721 | ILMN_241897 | -1.75 | 0.0000 |
| <i>Qtrt1</i>         | ILMN_1217927 | ILMN_219623 | -1.75 | 0.0002 |
| <i>LOC100044177</i>  | ILMN_1232495 | ILMN_330013 | -1.76 | 0.0000 |
| <i>Asgr1</i>         | ILMN_2608703 | ILMN_210744 | -1.77 | 0.0000 |
| <i>Serpinb11</i>     | ILMN_2834563 | ILMN_215688 | -1.77 | 0.0000 |
| <i>Cmas</i>          | ILMN_2683128 | ILMN_217430 | -1.77 | 0.0000 |
| <i>Acta2</i>         | ILMN_2923445 | ILMN_261122 | -1.77 | 0.0000 |
| <i>Kdelr3</i>        | ILMN_2675697 | ILMN_240560 | -1.78 | 0.0000 |
| <i>Krtcap3</i>       | ILMN_2859518 | ILMN_220056 | -1.79 | 0.0000 |
| <i>Clic6</i>         | ILMN_2667635 | ILMN_216126 | -1.79 | 0.0000 |
| <i>Aldh18a1</i>      | ILMN_3123473 | ILMN_253613 | -1.80 | 0.0000 |
| <i>Map3k1</i>        | ILMN_3006611 | ILMN_211294 | -1.80 | 0.0000 |
| <i>Hexb</i>          | ILMN_2829330 | ILMN_221504 | -1.80 | 0.0000 |
| <i>2310057J18Rik</i> | ILMN_1220128 | ILMN_210967 | -1.83 | 0.0000 |
| <i>Tmem184a</i>      | ILMN_2894396 | ILMN_214733 | -1.83 | 0.0000 |
| <i>Tmed3</i>         | ILMN_2850937 | ILMN_214664 | -1.84 | 0.0000 |
| <i>D3Ucla1</i>       | ILMN_2805945 | ILMN_220728 | -1.85 | 0.0000 |
| <i>Prss8</i>         | ILMN_2740965 | ILMN_221829 | -1.85 | 0.0000 |
| <i>Acpl2</i>         | ILMN_1254634 | ILMN_256033 | -1.85 | 0.0000 |
| <i>Zfp750</i>        | ILMN_2654571 | ILMN_215018 | -1.86 | 0.0000 |
| <i>Kcnk5</i>         | ILMN_2982781 | ILMN_218669 | -1.88 | 0.0000 |
| <i>Car12</i>         | ILMN_2891583 | ILMN_233734 | -1.90 | 0.0000 |
| <i>Ero1lb</i>        | ILMN_2692960 | ILMN_218209 | -1.90 | 0.0000 |
| <i>Faah</i>          | ILMN_2657980 | ILMN_215313 | -1.90 | 0.0000 |
| <i>D530004J12Rik</i> | ILMN_2703364 | ILMN_219031 | -1.91 | 0.0000 |
| <i>Foxa1</i>         | ILMN_1237195 | ILMN_221873 | -1.91 | 0.0000 |
| <i>Marveld3</i>      | ILMN_2632585 | ILMN_213009 | -1.91 | 0.0000 |
| <i>Nedd9</i>         | ILMN_2654186 | ILMN_211969 | -1.91 | 0.0000 |
| <i>Cyp2s1</i>        | ILMN_2758264 | ILMN_223026 | -1.92 | 0.0000 |
| <i>Scnn1g</i>        | ILMN_2759914 | ILMN_223147 | -1.92 | 0.0000 |
| <i>Ap1m2</i>         | ILMN_2925872 | ILMN_211827 | -1.93 | 0.0000 |
| <i>Liph</i>          | ILMN_1217063 | ILMN_217708 | -1.93 | 0.0000 |
| <i>Irx2</i>          | ILMN_3115213 | ILMN_256714 | -1.93 | 0.0003 |
| <i>Meis1</i>         | ILMN_1218266 | ILMN_220284 | -1.95 | 0.0000 |
| <i>Wwc1</i>          | ILMN_2525423 | ILMN_229795 | -1.96 | 0.0000 |
| <i>Rgs1</i>          | ILMN_2897891 | ILMN_226813 | -1.96 | 0.0000 |
| <i>LOC100047619</i>  | ILMN_2711948 | ILMN_313920 | -1.97 | 0.0000 |
| <i>Dsp</i>           | ILMN_2654997 | ILMN_255543 | -1.98 | 0.0000 |
| <i>LOC626152</i>     | ILMN_1243900 | ILMN_316341 | -2.00 | 0.0000 |
| <i>Emb</i>           | ILMN_1218799 | ILMN_208803 | -2.02 | 0.0000 |
| <i>AW555464</i>      | ILMN_2685769 | ILMN_217638 | -2.02 | 0.0000 |
| <i>Irf6</i>          | ILMN_1216279 | ILMN_215395 | -2.04 | 0.0000 |
| <i>2410002F23Rik</i> | ILMN_2629648 | ILMN_212730 | -2.04 | 0.0000 |
| <i>Dtnb</i>          | ILMN_2920027 | ILMN_219325 | -2.05 | 0.0000 |
| <i>D330028D13Rik</i> | ILMN_1217670 | ILMN_218922 | -2.05 | 0.0000 |
| <i>Ildr1</i>         | ILMN_2857684 | ILMN_219794 | -2.06 | 0.0000 |
| <i>9130404D14Rik</i> | ILMN_2686975 | ILMN_217737 | -2.06 | 0.0000 |
| <i>2410002F23Rik</i> | ILMN_2965641 | ILMN_212730 | -2.07 | 0.0000 |
| <i>Pip5k1b</i>       | ILMN_2711562 | ILMN_219634 | -2.07 | 0.0000 |
| <i>St5</i>           | ILMN_1250665 | ILMN_235447 | -2.09 | 0.0000 |

|                      |              |             |       |        |
|----------------------|--------------|-------------|-------|--------|
| <i>Elf5</i>          | ILMN_2938440 | ILMN_216298 | -2.10 | 0.0000 |
| <i>Ap1m2</i>         | ILMN_2762318 | ILMN_211827 | -2.10 | 0.0000 |
| <i>Efcab4a</i>       | ILMN_2720663 | ILMN_246608 | -2.11 | 0.0000 |
| <i>Acta2</i>         | ILMN_2693895 | ILMN_261122 | -2.12 | 0.0000 |
| <i>Bsnd</i>          | ILMN_2669493 | ILMN_216297 | -2.13 | 0.0000 |
| <i>1500015O10Rik</i> | ILMN_1249000 | ILMN_222808 | -2.13 | 0.0000 |
| <i>5330417C22Rik</i> | ILMN_3160472 | ILMN_231220 | -2.13 | 0.0000 |
| <i>Kndc1</i>         | ILMN_2757844 | ILMN_256267 | -2.13 | 0.0000 |
| <i>Nans</i>          | ILMN_1245757 | ILMN_215041 | -2.14 | 0.0000 |
| <i>Gdpd1</i>         | ILMN_2683528 | ILMN_217468 | -2.16 | 0.0000 |
| <i>Tes</i>           | ILMN_3084954 | ILMN_216487 | -2.17 | 0.0000 |
| <i>Grhl1</i>         | ILMN_1246419 | ILMN_214278 | -2.18 | 0.0000 |
| <i>Smpd13b</i>       | ILMN_2602938 | ILMN_210171 | -2.19 | 0.0000 |
| <i>Bglap1</i>        | ILMN_3101908 | ILMN_210884 | -2.20 | 0.0000 |
| <i>Gjb2</i>          | ILMN_1227148 | ILMN_210347 | -2.20 | 0.0000 |
| <i>Prlr</i>          | ILMN_2617005 | ILMN_210332 | -2.20 | 0.0000 |
| <i>Mtap2</i>         | ILMN_3137552 | ILMN_214246 | -2.21 | 0.0000 |
| <i>Pdcd4</i>         | ILMN_2898878 | ILMN_212354 | -2.21 | 0.0000 |
| <i>St5</i>           | ILMN_3154820 | ILMN_210050 | -2.21 | 0.0000 |
| <i>Jam4</i>          | ILMN_2919999 | ILMN_217986 | -2.23 | 0.0000 |
| <i>Tuft1</i>         | ILMN_2419185 | ILMN_184505 | -2.23 | 0.0000 |
| <i>D10Bwg1379e</i>   | ILMN_2781181 | ILMN_239049 | -2.23 | 0.0000 |
| <i>Ptprk</i>         | ILMN_2879600 | ILMN_227089 | -2.24 | 0.0000 |
| <i>Cadps2</i>        | ILMN_2998313 | ILMN_208854 | -2.24 | 0.0000 |
| <i>Ascl3</i>         | ILMN_2691996 | ILMN_218130 | -2.27 | 0.0000 |
| <i>Ly6g6e</i>        | ILMN_2991389 | ILMN_259052 | -2.28 | 0.0000 |
| <i>Tram1</i>         | ILMN_2487934 | ILMN_192424 | -2.29 | 0.0000 |
| <i>Atad4</i>         | ILMN_2788191 | ILMN_258414 | -2.29 | 0.0000 |
| <i>Itgb4</i>         | ILMN_3144575 | ILMN_249306 | -2.32 | 0.0000 |
| <i>Grhl2</i>         | ILMN_1257070 | ILMN_240233 | -2.32 | 0.0000 |
| <i>Gylt1b</i>        | ILMN_1235131 | ILMN_216242 | -2.33 | 0.0000 |
| <i>P4hb</i>          | ILMN_2735996 | ILMN_221467 | -2.34 | 0.0000 |
| <i>A1428936</i>      | ILMN_2619639 | ILMN_211797 | -2.35 | 0.0000 |
| <i>Spnb3</i>         | ILMN_2661588 | ILMN_240209 | -2.36 | 0.0000 |
| <i>Aldh1l2</i>       | ILMN_2898319 | ILMN_222938 | -2.37 | 0.0000 |
| <i>Lman1l</i>        | ILMN_3127595 | ILMN_214284 | -2.37 | 0.0000 |
| <i>Stk39</i>         | ILMN_2751494 | ILMN_222561 | -2.39 | 0.0000 |
| <i>Foxc1</i>         | ILMN_2886260 | ILMN_214651 | -2.40 | 0.0000 |
| <i>Tram1</i>         | ILMN_2781938 | ILMN_192424 | -2.41 | 0.0000 |
| <i>4922503N01Rik</i> | ILMN_2939503 | ILMN_210268 | -2.42 | 0.0000 |
| <i>Cd9</i>           | ILMN_2725414 | ILMN_220691 | -2.44 | 0.0000 |
| <i>Krt7</i>          | ILMN_2961152 | ILMN_223017 | -2.45 | 0.0000 |
| <i>Cyb561</i>        | ILMN_1232601 | ILMN_219873 | -2.46 | 0.0000 |
| <i>Rrbp1</i>         | ILMN_2612079 | ILMN_211061 | -2.47 | 0.0000 |
| <i>Cldn3</i>         | ILMN_2634167 | ILMN_213147 | -2.48 | 0.0000 |
| <i>Tns4</i>          | ILMN_1236029 | ILMN_216838 | -2.48 | 0.0000 |
| <i>Tcfap2b</i>       | ILMN_1223731 | ILMN_238889 | -2.49 | 0.0000 |
| <i>Slit2</i>         | ILMN_1253797 | ILMN_259247 | -2.54 | 0.0000 |
| <i>Tmem176a</i>      | ILMN_2795412 | ILMN_216668 | -2.54 | 0.0000 |
| <i>Efcab4a</i>       | ILMN_2913222 | ILMN_246608 | -2.54 | 0.0000 |

|                      |              |             |       |        |
|----------------------|--------------|-------------|-------|--------|
| <i>Pof1b</i>         | ILMN_1242912 | ILMN_221065 | -2.54 | 0.0000 |
| <i>Atp1b1</i>        | ILMN_2767615 | ILMN_223681 | -2.58 | 0.0000 |
| <i>Slc12a2</i>       | ILMN_2700059 | ILMN_211631 | -2.59 | 0.0000 |
| <i>Cldn4</i>         | ILMN_1223949 | ILMN_209388 | -2.60 | 0.0000 |
| <i>Abpg</i>          | ILMN_2696136 | ILMN_218461 | -2.64 | 0.0000 |
| <i>Gne</i>           | ILMN_2682503 | ILMN_251062 | -2.67 | 0.0000 |
| <i>Gstt3</i>         | ILMN_2665715 | ILMN_215961 | -2.67 | 0.0000 |
| <i>Grb7</i>          | ILMN_2773169 | ILMN_247424 | -2.68 | 0.0000 |
| <i>Garnl4</i>        | ILMN_2940713 | ILMN_226588 | -2.69 | 0.0000 |
| <i>LOC100046616</i>  | ILMN_1259982 | ILMN_324507 | -2.70 | 0.0000 |
| <i>BC017612</i>      | ILMN_2631514 | ILMN_234140 | -2.71 | 0.0000 |
| <i>Mup4</i>          | ILMN_2592166 | ILMN_209061 | -2.73 | 0.0000 |
| <i>Foxq1</i>         | ILMN_1224637 | ILMN_221286 | -2.74 | 0.0000 |
| <i>Wbp5</i>          | ILMN_2429025 | ILMN_185673 | -2.75 | 0.0000 |
| <i>Atp1a1</i>        | ILMN_1218058 | ILMN_222215 | -2.76 | 0.0000 |
| <i>Nupr1</i>         | ILMN_2742042 | ILMN_221920 | -2.77 | 0.0000 |
| <i>Cxcl17</i>        | ILMN_1226394 | ILMN_211385 | -2.78 | 0.0000 |
| <i>1190003J15Rik</i> | ILMN_2734924 | ILMN_238108 | -2.78 | 0.0000 |
| <i>Scnn1b</i>        | ILMN_2618383 | ILMN_211671 | -2.80 | 0.0000 |
| <i>Rab27a</i>        | ILMN_2614966 | ILMN_211354 | -2.80 | 0.0000 |
| <i>Herc2</i>         | ILMN_2717727 | ILMN_220107 | -2.82 | 0.0000 |
| <i>Tpd52</i>         | ILMN_3091288 | ILMN_246767 | -2.82 | 0.0000 |
| <i>Tmprss2</i>       | ILMN_1223880 | ILMN_189973 | -2.83 | 0.0000 |
| <i>Tmem176b</i>      | ILMN_1259470 | ILMN_211657 | -2.84 | 0.0000 |
| <i>Gjb2</i>          | ILMN_2999627 | ILMN_210347 | -2.85 | 0.0000 |
| <i>Acpp</i>          | ILMN_2693019 | ILMN_218213 | -2.86 | 0.0000 |
| <i>LOC100048733</i>  | ILMN_2759344 | ILMN_318857 | -2.89 | 0.0000 |
| <i>Krt14</i>         | ILMN_2722616 | ILMN_220479 | -2.89 | 0.0000 |
| <i>Oit1</i>          | ILMN_2732163 | ILMN_221188 | -2.90 | 0.0000 |
| <i>Slc5a8</i>        | ILMN_2739384 | ILMN_209122 | -2.93 | 0.0000 |
| <i>BC024561</i>      | ILMN_2783414 | ILMN_211385 | -2.93 | 0.0000 |
| <i>Sidt1</i>         | ILMN_1248211 | ILMN_256339 | -2.93 | 0.0000 |
| <i>Cdh1</i>          | ILMN_2628629 | ILMN_212630 | -2.97 | 0.0000 |
| <i>Fa2h</i>          | ILMN_2746783 | ILMN_222241 | -3.01 | 0.0000 |
| <i>lqgap2</i>        | ILMN_2908846 | ILMN_232331 | -3.02 | 0.0000 |
| <i>Tesc</i>          | ILMN_2748222 | ILMN_222340 | -3.13 | 0.0000 |
| <i>Bglap1</i>        | ILMN_2610166 | ILMN_247195 | -3.15 | 0.0000 |
| <i>Muc13</i>         | ILMN_2717678 | ILMN_217318 | -3.15 | 0.0000 |
| <i>1600029D21Rik</i> | ILMN_1259777 | ILMN_222410 | -3.18 | 0.0000 |
| <i>Kcnn4</i>         | ILMN_2765032 | ILMN_223516 | -3.19 | 0.0000 |
| <i>Kcnk1</i>         | ILMN_3009501 | ILMN_237297 | -3.25 | 0.0000 |
| <i>Elf5</i>          | ILMN_2736380 | ILMN_216298 | -3.38 | 0.0000 |
| <i>Slc12a2</i>       | ILMN_3146420 | ILMN_211631 | -3.42 | 0.0000 |
| <i>Csprs</i>         | ILMN_2661289 | ILMN_215584 | -3.42 | 0.0000 |
| <i>Unc13b</i>        | ILMN_1220360 | ILMN_248534 | -3.44 | 0.0000 |
| <i>Klk1b1</i>        | ILMN_1256119 | ILMN_196746 | -3.44 | 0.0000 |
| <i>Mansc1</i>        | ILMN_2848273 | ILMN_212652 | -3.46 | 0.0000 |
| <i>Bglap2</i>        | ILMN_2944508 | ILMN_226483 | -3.50 | 0.0000 |
| <i>Cited4</i>        | ILMN_2998934 | ILMN_255417 | -3.57 | 0.0000 |
| <i>Lpo</i>           | ILMN_2684053 | ILMN_217505 | -3.57 | 0.0000 |

|                          |              |             |       |        |
|--------------------------|--------------|-------------|-------|--------|
| <i>Pigr</i>              | ILMN_1225605 | ILMN_220227 | -3.62 | 0.0000 |
| <i>Krt8</i>              | ILMN_1221157 | ILMN_212791 | -3.64 | 0.0000 |
| <i>Smgc</i>              | ILMN_2775962 | ILMN_244638 | -3.67 | 0.0000 |
| <i>OTTMUSG0000007485</i> | ILMN_2881950 | ILMN_241785 | -3.70 | 0.0000 |
| <i>Phlda1</i>            | ILMN_2754985 | ILMN_222798 | -3.71 | 0.0000 |
| <i>Cyp2f2</i>            | ILMN_2702903 | ILMN_218995 | -3.72 | 0.0000 |
| <i>Krt18</i>             | ILMN_2711267 | ILMN_219615 | -3.74 | 0.0000 |
| <i>Prom2</i>             | ILMN_1246392 | ILMN_214759 | -3.76 | 0.0000 |
| <i>Ngfb</i>              | ILMN_2660233 | ILMN_215493 | -3.77 | 0.0000 |
| <i>Slc12a8</i>           | ILMN_2721789 | ILMN_312656 | -3.77 | 0.0000 |
| <i>Bhlhb8</i>            | ILMN_2664777 | ILMN_214740 | -3.77 | 0.0000 |
| <i>Car6</i>              | ILMN_1257323 | ILMN_258206 | -3.79 | 0.0000 |
| <i>Fkbp11</i>            | ILMN_1224635 | ILMN_210599 | -3.80 | 0.0000 |
| <i>Clcnkb</i>            | ILMN_2757283 | ILMN_234837 | -3.91 | 0.0000 |
| <i>Fxyd3</i>             | ILMN_2595593 | ILMN_209417 | -3.91 | 0.0000 |
| <i>Npal2</i>             | ILMN_2723369 | ILMN_235586 | -3.97 | 0.0000 |
| <i>Rab15</i>             | ILMN_1217009 | ILMN_218127 | -3.97 | 0.0000 |
| <i>Ppp1r1b</i>           | ILMN_2954824 | ILMN_214764 | -4.00 | 0.0000 |
| <i>Fxyd2</i>             | ILMN_1251018 | ILMN_211483 | -4.05 | 0.0000 |
| <i>Ngfb</i>              | ILMN_2937596 | ILMN_215493 | -4.07 | 0.0000 |
| <i>Mist1</i>             | ILMN_2651388 | ILMN_214740 | -4.17 | 0.0000 |
| <i>Lrrc26</i>            | ILMN_2682268 | ILMN_217355 | -4.17 | 0.0000 |
| <i>Ncald</i>             | ILMN_2652414 | ILMN_247828 | -4.19 | 0.0000 |
| <i>Cldn10</i>            | ILMN_2723576 | ILMN_252548 | -4.22 | 0.0000 |
| <i>Atp2a3</i>            | ILMN_2688236 | ILMN_213534 | -4.26 | 0.0000 |
| <i>Aqp5</i>              | ILMN_3115472 | ILMN_217154 | -4.28 | 0.0000 |
| <i>Ckmt1</i>             | ILMN_2773537 | ILMN_235471 | -4.28 | 0.0000 |
| <i>Atp2a3</i>            | ILMN_2900462 | ILMN_213534 | -4.29 | 0.0000 |
| <i>Rbm35a</i>            | ILMN_2947559 | ILMN_210806 | -4.39 | 0.0000 |
| <i>Bhlhb8</i>            | ILMN_2651389 | ILMN_214740 | -4.41 | 0.0000 |
| <i>Cldn10</i>            | ILMN_1214954 | ILMN_209356 | -4.43 | 0.0000 |
| <i>Abpg</i>              | ILMN_2599449 | ILMN_209813 | -4.45 | 0.0000 |
| <i>Bglap-rs1</i>         | ILMN_1233122 | ILMN_236469 | -4.49 | 0.0000 |
| <i>Fxyd2</i>             | ILMN_2616328 | ILMN_211483 | -4.53 | 0.0000 |
| <i>Wfdc2</i>             | ILMN_1236758 | ILMN_216447 | -4.74 | 0.0000 |
| <i>Krt23</i>             | ILMN_2671165 | ILMN_216445 | -4.85 | 0.0000 |
| <i>Kal1</i>              | ILMN_1239717 | ILMN_223014 | -4.92 | 0.0000 |
| <i>Egf</i>               | ILMN_2684104 | ILMN_217509 | -4.94 | 0.0000 |
| <i>Klk1b21</i>           | ILMN_2732087 | ILMN_196711 | -5.20 | 0.0000 |
| <i>Klk1b21</i>           | ILMN_2651099 | ILMN_196711 | -5.23 | 0.0000 |
| <i>Cldn10</i>            | ILMN_2515816 | ILMN_252548 | -5.41 | 0.0000 |
| <i>Klk1b11</i>           | ILMN_2632912 | ILMN_196710 | -5.42 | 0.0000 |
| <i>Klk1b16</i>           | ILMN_1259613 | ILMN_196767 | -5.71 | 0.0000 |
| <i>Smgc</i>              | ILMN_2602496 | ILMN_210125 | -5.72 | 0.0000 |
| <i>Klk1b24</i>           | ILMN_2622463 | ILMN_196770 | -5.76 | 0.0000 |
| <i>Klk1b9</i>            | ILMN_2723594 | ILMN_196709 | -5.80 | 0.0000 |
| <i>2310057J18Rik</i>     | ILMN_2940678 | ILMN_210967 | -5.98 | 0.0000 |
| <i>Klk1b5</i>            | ILMN_1224893 | ILMN_196768 | -6.04 | 0.0000 |
| <i>Smgc</i>              | ILMN_2620853 | ILMN_210125 | -6.04 | 0.0000 |
| <i>Psp</i>               | ILMN_1245726 | ILMN_216963 | -6.18 | 0.0000 |

|                     |              |             |       |        |
|---------------------|--------------|-------------|-------|--------|
| <i>Klk1b27</i>      | ILMN_3009447 | ILMN_196774 | -6.20 | 0.0000 |
| <i>Klk1b9</i>       | ILMN_2784773 | ILMN_196709 | -6.26 | 0.0000 |
| <i>Klk1b8</i>       | ILMN_1216962 | ILMN_212623 | -6.31 | 0.0000 |
| <i>Abpa</i>         | ILMN_1249191 | ILMN_216701 | -6.35 | 0.0000 |
| <i>Klk1b4</i>       | ILMN_2697256 | ILMN_199361 | -6.51 | 0.0000 |
| <i>Wfdc12</i>       | ILMN_2948296 | ILMN_196009 | -6.62 | 0.0000 |
| <i>Klk1b22</i>      | ILMN_2946653 | ILMN_239601 | -6.64 | 0.0000 |
| <i>Klk1b11</i>      | ILMN_2979432 | ILMN_196710 | -6.64 | 0.0000 |
| <i>Egfbp2</i>       | ILMN_2791241 | ILMN_196757 | -6.67 | 0.0000 |
| <i>Mup5</i>         | ILMN_3158509 | ILMN_214274 | -6.67 | 0.0000 |
| <i>Klk1b26</i>      | ILMN_1217308 | ILMN_196712 | -6.84 | 0.0000 |
| <i>Klk1b5</i>       | ILMN_2731191 | ILMN_196768 | -6.86 | 0.0000 |
| <i>Abpb</i>         | ILMN_2915893 | ILMN_250100 | -6.87 | 0.0000 |
| <i>Klk1b4</i>       | ILMN_1238736 | ILMN_199361 | -6.94 | 0.0000 |
| <i>Pip</i>          | ILMN_2621766 | ILMN_212014 | -6.98 | 0.0000 |
| <i>LOC100044256</i> | ILMN_2703052 | ILMN_313374 | -6.99 | 0.0000 |
| <i>Muc10</i>        | ILMN_1247393 | ILMN_212146 | -7.01 | 0.0000 |
| <i>Abpb</i>         | ILMN_2771109 | ILMN_315214 | -7.01 | 0.0000 |
| <i>Klk1</i>         | ILMN_2760199 | ILMN_196747 | -7.04 | 0.0000 |
| <i>Mup5</i>         | ILMN_3079257 | ILMN_214274 | -7.07 | 0.0000 |
| <i>Spt1</i>         | ILMN_2845370 | ILMN_217293 | -7.15 | 0.0000 |
| <i>Muc10</i>        | ILMN_2623234 | ILMN_212146 | -7.15 | 0.0000 |
| <i>Klk1b27</i>      | ILMN_1252131 | ILMN_196774 | -7.23 | 0.0000 |

---
