# Supplementary material for: Deconvolution of expression microarray data reveals 131I-induced responses otherwise undetected in thyroid tissue
Source: PubMed Central journal article supplement (PMC6042689; doi:10.1371/journal.pone.0197911), 2018-07-12
Supplement: pone.0197911.s005.pdf [file pone.0197911.s005.pdf]

**Supplemental Table 3. List of significantly regulated transcripts in deconvolved data for follicular cells**

The log<sub>2</sub>-ratio threshold was set to 0.58 with a p-value threshold of 0.01.

Multiple test correction for FDR was performed using the Benjamini Hochberg method in NEXUS 3.0 (BioDiscovery; El Segundo, CA, USA).

The pool size for intensity based pooling was set to 200.

| <b>Gene Symbol</b>    | <b>Probe</b> | <b>Transcript</b> | <b>Log<sub>2</sub> ratio</b> | <b>adjusted p-value</b> |
|-----------------------|--------------|-------------------|------------------------------|-------------------------|
| <i>Enpp7</i>          | ILMN_3075190 | ILMN_248310       | 11.92                        | 0.0000                  |
| <i>Tmem23</i>         | ILMN_2480682 | ILMN_191618       | 9.75                         | 0.0000                  |
| <i>Lbh</i>            | ILMN_1233545 | ILMN_215742       | 9.71                         | 0.0000                  |
| <i>Itgbl1</i>         | ILMN_2636424 | ILMN_236699       | 9.67                         | 0.0000                  |
| <i>4933412E14Rik</i>  | ILMN_2680238 | ILMN_217200       | 9.29                         | 0.0000                  |
| <i>Mat2a</i>          | ILMN_1258415 | ILMN_261868       | 8.53                         | 0.0000                  |
| <i>Acta1</i>          | ILMN_2738825 | ILMN_221671       | 8.14                         | 0.0000                  |
| <i>Tnni2</i>          | ILMN_2481133 | ILMN_191670       | 8.14                         | 0.0000                  |
| <i>Lmna</i>           | ILMN_2662387 | ILMN_209635       | 7.87                         | 0.0000                  |
| <i>Atp2a1</i>         | ILMN_2666864 | ILMN_216061       | 7.83                         | 0.0000                  |
| <i>Samhd1</i>         | ILMN_1221736 | ILMN_211012       | 7.65                         | 0.0000                  |
| <i>Psmb8</i>          | ILMN_2693940 | ILMN_259219       | 7.14                         | 0.0000                  |
| <i>Tcap</i>           | ILMN_2933357 | ILMN_218508       | 7.11                         | 0.0000                  |
| <i>Prpf39</i>         | ILMN_2692799 | ILMN_218194       | 7.08                         | 0.0000                  |
| <i>Tnnc2</i>          | ILMN_2882658 | ILMN_188936       | 6.84                         | 0.0000                  |
| <i>Krtcap2</i>        | ILMN_2605694 | ILMN_210448       | 6.70                         | 0.0000                  |
| <i>Upf1</i>           | ILMN_2604108 | ILMN_239726       | 6.66                         | 0.0000                  |
| <i>Mcf2</i>           | ILMN_3111298 | ILMN_250390       | 6.65                         | 0.0000                  |
| <i>Npm3-ps1</i>       | ILMN_2965417 | ILMN_255379       | 6.61                         | 0.0000                  |
| <i>Zgpat</i>          | ILMN_3157372 | ILMN_261515       | 6.60                         | 0.0000                  |
| <i>Slc30a5</i>        | ILMN_1221208 | ILMN_211338       | 6.51                         | 0.0000                  |
| <i>Slc40a1</i>        | ILMN_2747923 | ILMN_222315       | 6.48                         | 0.0000                  |
| <i>Arhgap29</i>       | ILMN_2753687 | ILMN_237863       | 6.40                         | 0.0000                  |
| <i>Ada</i>            | ILMN_1228696 | ILMN_217667       | 6.20                         | 0.0000                  |
| <i>Myom1</i>          | ILMN_2815138 | ILMN_241505       | 6.19                         | 0.0000                  |
| <i>Tpm4</i>           | ILMN_2515363 | ILMN_237612       | 6.08                         | 0.0000                  |
| <i>1700047117Rik1</i> | ILMN_3034034 | ILMN_221070       | 6.07                         | 0.0000                  |
| <i>Ttn</i>            | ILMN_2416670 | ILMN_184200       | 6.04                         | 0.0000                  |
| <i>Vps28</i>          | ILMN_1226704 | ILMN_194493       | 6.00                         | 0.0000                  |
| <i>Zfp61</i>          | ILMN_2475363 | ILMN_188854       | 5.85                         | 0.0000                  |
| <i>Ttn</i>            | ILMN_3128792 | ILMN_255016       | 5.79                         | 0.0000                  |
| <i>Atp6ap2</i>        | ILMN_2628657 | ILMN_210527       | 5.67                         | 0.0000                  |
| <i>Hnrph3</i>         | ILMN_2958912 | ILMN_255042       | 5.67                         | 0.0000                  |
| <i>A2bp1</i>          | ILMN_1238309 | ILMN_216899       | 5.65                         | 0.0000                  |
| <i>Supt4h1</i>        | ILMN_1247505 | ILMN_231446       | 5.45                         | 0.0000                  |
| <i>Mtus1</i>          | ILMN_3064383 | ILMN_244478       | 5.39                         | 0.0000                  |
| <i>2010106G01Rik</i>  | ILMN_1252689 | ILMN_220370       | 5.37                         | 0.0000                  |
| <i>Ubt2</i>           | ILMN_2669259 | ILMN_216275       | 5.36                         | 0.0000                  |
| <i>Tbcd</i>           | ILMN_2891506 | ILMN_255544       | 5.36                         | 0.0000                  |
| <i>2410022L05Rik</i>  | ILMN_1234516 | ILMN_214324       | 5.36                         | 0.0000                  |
| <i>Nol9</i>           | ILMN_3160348 | ILMN_223288       | 5.34                         | 0.0000                  |
| <i>Asb2</i>           | ILMN_2765759 | ILMN_223558       | 5.33                         | 0.0000                  |

|                      |              |             |      |        |
|----------------------|--------------|-------------|------|--------|
| <i>Olr1</i>          | ILMN_2745565 | ILMN_216724 | 5.31 | 0.0000 |
| <i>Ankrd54</i>       | ILMN_2600078 | ILMN_209878 | 5.30 | 0.0000 |
| <i>Grap</i>          | ILMN_2617656 | ILMN_211613 | 5.27 | 0.0000 |
| <i>Ube2q1</i>        | ILMN_1259048 | ILMN_191561 | 5.27 | 0.0000 |
| <i>AW146242</i>      | ILMN_2735429 | ILMN_221426 | 5.26 | 0.0000 |
| <i>2610209M04Rik</i> | ILMN_2860750 | ILMN_223751 | 5.26 | 0.0000 |
| <i>Cox6a2</i>        | ILMN_2629581 | ILMN_212725 | 5.22 | 0.0000 |
| <i>Dcp1a</i>         | ILMN_2783429 | ILMN_218539 | 5.20 | 0.0000 |
| <i>Uchl1</i>         | ILMN_1225261 | ILMN_190011 | 5.20 | 0.0000 |
| <i>E130309F12Rik</i> | ILMN_1218474 | ILMN_210734 | 5.17 | 0.0036 |
| <i>Fbxo32</i>        | ILMN_2873444 | ILMN_219973 | 5.13 | 0.0000 |
| <i>Igf2bp3</i>       | ILMN_1218913 | ILMN_218056 | 5.12 | 0.0000 |
| <i>Etsrp71</i>       | ILMN_2678641 | ILMN_217057 | 5.09 | 0.0000 |
| <i>Fbxo33</i>        | ILMN_3162369 | ILMN_234957 | 5.07 | 0.0000 |
| <i>Fos</i>           | ILMN_2750515 | ILMN_222500 | 5.05 | 0.0001 |
| <i>Mrpl51</i>        | ILMN_2831273 | ILMN_199367 | 5.01 | 0.0000 |
| <i>4933417E01Rik</i> | ILMN_1226326 | ILMN_318969 | 5.01 | 0.0000 |
| <i>Wdr5b</i>         | ILMN_2425488 | ILMN_256044 | 5.01 | 0.0000 |
| <i>LOC100045542</i>  | ILMN_1230893 | ILMN_317147 | 5.00 | 0.0000 |
| <i>Trp53inp1</i>     | ILMN_2506012 | ILMN_194391 | 4.99 | 0.0000 |
| <i>Crisp2</i>        | ILMN_2715114 | ILMN_219913 | 4.96 | 0.0000 |
| <i>Reps1</i>         | ILMN_1250054 | ILMN_210950 | 4.95 | 0.0000 |
| <i>Xpo4</i>          | ILMN_1231751 | ILMN_185320 | 4.94 | 0.0000 |
| <i>AA407659</i>      | ILMN_2876010 | ILMN_208916 | 4.93 | 0.0000 |
| <i>Sema3f</i>        | ILMN_1248740 | ILMN_213287 | 4.93 | 0.0000 |
| <i>LOC669001</i>     | ILMN_1256102 | ILMN_241214 | 4.92 | 0.0000 |
| <i>Rad50</i>         | ILMN_2867427 | ILMN_214521 | 4.92 | 0.0000 |
| <i>Mrps18c</i>       | ILMN_2747345 | ILMN_244766 | 4.91 | 0.0014 |
| <i>Prim2</i>         | ILMN_2982965 | ILMN_222217 | 4.90 | 0.0000 |
| <i>Hnrpk</i>         | ILMN_1245987 | ILMN_213571 | 4.84 | 0.0001 |
| <i>Trim33</i>        | ILMN_1236637 | ILMN_188197 | 4.81 | 0.0000 |
| <i>Plekhg2</i>       | ILMN_2987027 | ILMN_210871 | 4.79 | 0.0000 |
| <i>Nr1h2</i>         | ILMN_3014084 | ILMN_225790 | 4.79 | 0.0000 |
| <i>Prss8</i>         | ILMN_2740965 | ILMN_221829 | 4.72 | 0.0000 |
| <i>Cyt11</i>         | ILMN_2877029 | ILMN_255006 | 4.71 | 0.0000 |
| <i>AA407270</i>      | ILMN_2913989 | ILMN_261110 | 4.69 | 0.0000 |
| <i>Sec14l1</i>       | ILMN_2680308 | ILMN_238122 | 4.69 | 0.0000 |
| <i>Gdap1l1</i>       | ILMN_2989312 | ILMN_210626 | 4.68 | 0.0000 |
| <i>Cript</i>         | ILMN_1223929 | ILMN_220029 | 4.66 | 0.0000 |
| <i>Senp7</i>         | ILMN_1260543 | ILMN_259312 | 4.65 | 0.0000 |
| <i>Ahnak2</i>        | ILMN_3161105 | ILMN_254174 | 4.65 | 0.0000 |
| <i>Mpp5</i>          | ILMN_2590811 | ILMN_208920 | 4.65 | 0.0029 |
| <i>Dyrk3</i>         | ILMN_2699522 | ILMN_258582 | 4.64 | 0.0000 |
| <i>Syngr1</i>        | ILMN_2657751 | ILMN_214854 | 4.63 | 0.0000 |
| <i>Kars</i>          | ILMN_2606848 | ILMN_210561 | 4.63 | 0.0000 |
| <i>Cherp</i>         | ILMN_2746924 | ILMN_222253 | 4.62 | 0.0008 |
| <i>Cpsf3</i>         | ILMN_2870410 | ILMN_218395 | 4.62 | 0.0000 |
| <i>Zfp459</i>        | ILMN_1253331 | ILMN_225147 | 4.60 | 0.0000 |
| <i>Zscan2</i>        | ILMN_2481127 | ILMN_191669 | 4.59 | 0.0000 |
| <i>Mrc2</i>          | ILMN_2639981 | ILMN_251607 | 4.59 | 0.0000 |

|                      |              |             |      |        |
|----------------------|--------------|-------------|------|--------|
| <i>Slc39a5</i>       | ILMN_2705424 | ILMN_219188 | 4.57 | 0.0000 |
| <i>Gimap4</i>        | ILMN_1225854 | ILMN_222975 | 4.57 | 0.0000 |
| <i>Kynu</i>          | ILMN_1214750 | ILMN_219585 | 4.57 | 0.0000 |
| <i>Olfr6</i>         | ILMN_2708938 | ILMN_219441 | 4.55 | 0.0000 |
| <i>Aif1</i>          | ILMN_2804487 | ILMN_215740 | 4.54 | 0.0000 |
| <i>Sepm</i>          | ILMN_1226838 | ILMN_219316 | 4.51 | 0.0000 |
| <i>Napa</i>          | ILMN_2865822 | ILMN_212166 | 4.51 | 0.0000 |
| <i>Tas2r114</i>      | ILMN_1248846 | ILMN_223207 | 4.49 | 0.0000 |
| <i>Nans</i>          | ILMN_1245757 | ILMN_215041 | 4.49 | 0.0018 |
| <i>Epha3</i>         | ILMN_2629805 | ILMN_212746 | 4.48 | 0.0000 |
| <i>Sesn3</i>         | ILMN_2622997 | ILMN_228252 | 4.47 | 0.0000 |
| <i>Pik3ip1</i>       | ILMN_2769772 | ILMN_210015 | 4.47 | 0.0000 |
| <i>LOC100045522</i>  | ILMN_3163529 | ILMN_322016 | 4.47 | 0.0000 |
| <i>Mbd1</i>          | ILMN_2893081 | ILMN_210686 | 4.45 | 0.0000 |
| <i>Psmc11</i>        | ILMN_1230682 | ILMN_213316 | 4.43 | 0.0010 |
| <i>Foxo1</i>         | ILMN_2656498 | ILMN_242706 | 4.43 | 0.0000 |
| <i>Brd4</i>          | ILMN_2627582 | ILMN_210066 | 4.42 | 0.0005 |
| <i>Fbxo32</i>        | ILMN_2752994 | ILMN_219973 | 4.42 | 0.0000 |
| <i>Tgfb1</i>         | ILMN_2708965 | ILMN_210148 | 4.41 | 0.0068 |
| <i>Lonrf2</i>        | ILMN_2848288 | ILMN_247187 | 4.41 | 0.0000 |
| <i>Snta1</i>         | ILMN_2734142 | ILMN_221335 | 4.40 | 0.0000 |
| <i>Comm2</i>         | ILMN_2642615 | ILMN_210241 | 4.39 | 0.0000 |
| <i>BC024997</i>      | ILMN_1247389 | ILMN_222811 | 4.39 | 0.0057 |
| <i>4930427A07Rik</i> | ILMN_1217337 | ILMN_221758 | 4.38 | 0.0000 |
| <i>Gpkow</i>         | ILMN_2728189 | ILMN_214633 | 4.38 | 0.0071 |
| <i>Ccdc21</i>        | ILMN_2759983 | ILMN_223152 | 4.37 | 0.0000 |
| <i>Clec7a</i>        | ILMN_2653132 | ILMN_260465 | 4.37 | 0.0000 |
| <i>Trim30</i>        | ILMN_1229630 | ILMN_257424 | 4.37 | 0.0011 |
| <i>D3Wsu161e</i>     | ILMN_2636456 | ILMN_213376 | 4.35 | 0.0000 |
| <i>Tmem49</i>        | ILMN_2616768 | ILMN_209017 | 4.35 | 0.0001 |
| <i>Hsd11</i>         | ILMN_2691227 | ILMN_218076 | 4.35 | 0.0000 |
| <i>Slc24a6</i>       | ILMN_2643377 | ILMN_214023 | 4.34 | 0.0000 |
| <i>Ddx19a</i>        | ILMN_1233412 | ILMN_218762 | 4.34 | 0.0000 |
| <i>Ankrd2</i>        | ILMN_2806065 | ILMN_214035 | 4.33 | 0.0000 |
| <i>Cort</i>          | ILMN_1226607 | ILMN_209317 | 4.33 | 0.0000 |
| <i>Icmt</i>          | ILMN_2791410 | ILMN_255616 | 4.32 | 0.0000 |
| <i>AA691260</i>      | ILMN_2606136 | ILMN_193283 | 4.32 | 0.0000 |
| <i>Mfsd10</i>        | ILMN_2836586 | ILMN_214166 | 4.31 | 0.0000 |
| <i>Mreg</i>          | ILMN_2976159 | ILMN_253687 | 4.31 | 0.0015 |
| <i>Ly6d</i>          | ILMN_2803921 | ILMN_223061 | 4.31 | 0.0000 |
| <i>Nrap</i>          | ILMN_1235070 | ILMN_217102 | 4.30 | 0.0000 |
| <i>1110020G09Rik</i> | ILMN_1237830 | ILMN_313573 | 4.28 | 0.0090 |
| <i>Klhdc4</i>        | ILMN_2602115 | ILMN_237570 | 4.28 | 0.0069 |
| <i>Gtf2e2</i>        | ILMN_2817371 | ILMN_222459 | 4.27 | 0.0000 |
| <i>Rab711</i>        | ILMN_2681186 | ILMN_217263 | 4.27 | 0.0000 |
| <i>Peli3</i>         | ILMN_2619678 | ILMN_211803 | 4.27 | 0.0000 |
| <i>Asb3</i>          | ILMN_2663555 | ILMN_246247 | 4.26 | 0.0000 |
| <i>Ptp4a3</i>        | ILMN_2655260 | ILMN_213418 | 4.25 | 0.0003 |
| <i>Ttc7</i>          | ILMN_2946689 | ILMN_257003 | 4.23 | 0.0001 |
| <i>Btg2</i>          | ILMN_1256772 | ILMN_219869 | 4.22 | 0.0000 |

|                      |              |             |      |        |
|----------------------|--------------|-------------|------|--------|
| <i>Rnf135</i>        | ILMN_2655034 | ILMN_215057 | 4.21 | 0.0000 |
| <i>Dhx30</i>         | ILMN_1233008 | ILMN_212148 | 4.20 | 0.0000 |
| <i>Actrt1</i>        | ILMN_2618100 | ILMN_211644 | 4.20 | 0.0047 |
| <i>4933439C20Rik</i> | ILMN_2944601 | ILMN_241433 | 4.19 | 0.0000 |
| <i>Rbm43</i>         | ILMN_2995426 | ILMN_218064 | 4.19 | 0.0000 |
| <i>Snap91</i>        | ILMN_2597032 | ILMN_209567 | 4.19 | 0.0000 |
| <i>Kremen1</i>       | ILMN_2651035 | ILMN_230470 | 4.18 | 0.0008 |
| <i>Ercc6</i>         | ILMN_2688327 | ILMN_260837 | 4.17 | 0.0000 |
| <i>Jarid1c</i>       | ILMN_2970823 | ILMN_247102 | 4.17 | 0.0018 |
| <i>Ube2k</i>         | ILMN_2655066 | ILMN_213294 | 4.17 | 0.0002 |
| <i>Myd116</i>        | ILMN_2722938 | ILMN_220505 | 4.17 | 0.0000 |
| <i>Cox7a2l</i>       | ILMN_2888713 | ILMN_238225 | 4.15 | 0.0000 |
| <i>Snapc3</i>        | ILMN_1213437 | ILMN_249101 | 4.15 | 0.0000 |
| <i>H2afz</i>         | ILMN_3074985 | ILMN_222997 | 4.15 | 0.0002 |
| <i>Eif2c2</i>        | ILMN_2609056 | ILMN_226444 | 4.14 | 0.0000 |
| <i>Nr1d2</i>         | ILMN_2602387 | ILMN_210116 | 4.13 | 0.0005 |
| <i>1190002A17Rik</i> | ILMN_2590894 | ILMN_258501 | 4.13 | 0.0005 |
| <i>Igf2bp3</i>       | ILMN_1226175 | ILMN_218056 | 4.13 | 0.0000 |
| <i>Zfp410</i>        | ILMN_2840327 | ILMN_231991 | 4.12 | 0.0000 |
| <i>Plscr1</i>        | ILMN_2911344 | ILMN_218871 | 4.12 | 0.0000 |
| <i>Cebpa</i>         | ILMN_1247147 | ILMN_231653 | 4.12 | 0.0000 |
| <i>A730011L01Rik</i> | ILMN_1238805 | ILMN_208999 | 4.11 | 0.0000 |
| <i>Zfp523</i>        | ILMN_1236258 | ILMN_196146 | 4.10 | 0.0004 |
| <i>Nrap</i>          | ILMN_3061287 | ILMN_247151 | 4.09 | 0.0001 |
| <i>Flcn</i>          | ILMN_1213483 | ILMN_210700 | 4.09 | 0.0000 |
| <i>Fes</i>           | ILMN_2695793 | ILMN_218433 | 4.09 | 0.0028 |
| <i>Defcr6</i>        | ILMN_1255021 | ILMN_196559 | 4.09 | 0.0000 |
| <i>Eya3</i>          | ILMN_2761966 | ILMN_210388 | 4.08 | 0.0000 |
| <i>Junb</i>          | ILMN_1220034 | ILMN_221987 | 4.08 | 0.0001 |
| <i>Tmem2</i>         | ILMN_2430220 | ILMN_246039 | 4.08 | 0.0002 |
| <i>Actn3</i>         | ILMN_2708303 | ILMN_219398 | 4.08 | 0.0000 |
| <i>Btbd9</i>         | ILMN_2643933 | ILMN_214072 | 4.08 | 0.0001 |
| <i>Ecm1</i>          | ILMN_2947526 | ILMN_213475 | 4.07 | 0.0000 |
| <i>2310010B21Rik</i> | ILMN_2696360 | ILMN_218479 | 4.07 | 0.0000 |
| <i>Myot</i>          | ILMN_2444217 | ILMN_250811 | 4.07 | 0.0000 |
| <i>Acss1</i>         | ILMN_2628174 | ILMN_212588 | 4.07 | 0.0000 |
| <i>Chmp4c</i>        | ILMN_2601851 | ILMN_210063 | 4.06 | 0.0001 |
| <i>Mmp2</i>          | ILMN_2678218 | ILMN_217021 | 4.06 | 0.0001 |
| <i>Kif4</i>          | ILMN_2747641 | ILMN_222148 | 4.05 | 0.0021 |
| <i>Ddhd1</i>         | ILMN_2446727 | ILMN_187741 | 4.04 | 0.0004 |
| <i>Sfrs2</i>         | ILMN_1235653 | ILMN_213364 | 4.02 | 0.0000 |
| <i>Athl1</i>         | ILMN_2910684 | ILMN_240733 | 4.01 | 0.0000 |
| <i>Ltf</i>           | ILMN_2754364 | ILMN_222761 | 4.01 | 0.0010 |
| <i>Zfp87</i>         | ILMN_2992836 | ILMN_191750 | 4.01 | 0.0001 |
| <i>Pld3</i>          | ILMN_2702101 | ILMN_218931 | 4.00 | 0.0000 |
| <i>Myh9</i>          | ILMN_2672626 | ILMN_216568 | 3.99 | 0.0001 |
| <i>Sf1</i>           | ILMN_2493851 | ILMN_188043 | 3.99 | 0.0000 |
| <i>Naca</i>          | ILMN_2651643 | ILMN_214762 | 3.99 | 0.0000 |
| <i>Ada</i>           | ILMN_2686132 | ILMN_217667 | 3.98 | 0.0000 |
| <i>Hnt</i>           | ILMN_2681195 | ILMN_260609 | 3.98 | 0.0041 |

|                      |              |             |      |        |
|----------------------|--------------|-------------|------|--------|
| <i>AU040320</i>      | ILMN_3024494 | ILMN_241990 | 3.97 | 0.0000 |
| <i>Thbs3</i>         | ILMN_2654651 | ILMN_210110 | 3.97 | 0.0000 |
| <i>Ctsk</i>          | ILMN_2711163 | ILMN_219610 | 3.94 | 0.0003 |
| <i>EG317677</i>      | ILMN_1260226 | ILMN_213670 | 3.91 | 0.0000 |
| <i>5630401D24Rik</i> | ILMN_2754492 | ILMN_221329 | 3.91 | 0.0000 |
| <i>Polr3k</i>        | ILMN_1215772 | ILMN_213704 | 3.91 | 0.0009 |
| <i>Ccs</i>           | ILMN_1253618 | ILMN_215857 | 3.90 | 0.0086 |
| <i>EG432870</i>      | ILMN_3161312 | ILMN_250183 | 3.90 | 0.0000 |
| <i>Ceacam18</i>      | ILMN_1217029 | ILMN_231109 | 3.89 | 0.0001 |
| <i>Gira2</i>         | ILMN_2729364 | ILMN_220976 | 3.88 | 0.0000 |
| <i>Top2a</i>         | ILMN_2830661 | ILMN_187810 | 3.87 | 0.0000 |
| <i>Bclaf1</i>        | ILMN_3096361 | ILMN_242377 | 3.87 | 0.0001 |
| <i>Midn</i>          | ILMN_2658566 | ILMN_209610 | 3.86 | 0.0011 |
| <i>Kif1b</i>         | ILMN_2654314 | ILMN_214427 | 3.86 | 0.0004 |
| <i>Eif2ak1</i>       | ILMN_2709397 | ILMN_193332 | 3.85 | 0.0054 |
| <i>1190005P17Rik</i> | ILMN_2596834 | ILMN_209045 | 3.85 | 0.0000 |
| <i>Brca2</i>         | ILMN_2634750 | ILMN_213209 | 3.84 | 0.0000 |
| <i>Lsm5</i>          | ILMN_2971946 | ILMN_259737 | 3.83 | 0.0000 |
| <i>Chac1</i>         | ILMN_2617468 | ILMN_211596 | 3.83 | 0.0000 |
| <i>Cox7a2</i>        | ILMN_2733698 | ILMN_221305 | 3.83 | 0.0030 |
| <i>Adam6</i>         | ILMN_1238157 | ILMN_210813 | 3.83 | 0.0028 |
| <i>Lce3f</i>         | ILMN_2610594 | ILMN_240447 | 3.83 | 0.0081 |
| <i>Pbx3</i>          | ILMN_2650972 | ILMN_210749 | 3.82 | 0.0000 |
| <i>Pcdhga2</i>       | ILMN_2746009 | ILMN_222189 | 3.82 | 0.0059 |
| <i>6430526O11Rik</i> | ILMN_2728255 | ILMN_219257 | 3.79 | 0.0063 |
| <i>Arl6ip2</i>       | ILMN_3060766 | ILMN_215568 | 3.79 | 0.0001 |
| <i>Nhlrc3</i>        | ILMN_1219639 | ILMN_225167 | 3.79 | 0.0000 |
| <i>Ankrd12</i>       | ILMN_3151492 | ILMN_258504 | 3.77 | 0.0003 |
| <i>Spcb2</i>         | ILMN_1244992 | ILMN_209605 | 3.77 | 0.0000 |
| <i>Gga3</i>          | ILMN_1242273 | ILMN_254242 | 3.77 | 0.0002 |
| <i>Zfp330</i>        | ILMN_2440789 | ILMN_187056 | 3.77 | 0.0008 |
| <i>Tug1</i>          | ILMN_3028324 | ILMN_260041 | 3.77 | 0.0019 |
| <i>LOC225594</i>     | ILMN_2996973 | ILMN_261460 | 3.76 | 0.0002 |
| <i>Aldh3b1</i>       | ILMN_2645793 | ILMN_214234 | 3.76 | 0.0004 |
| <i>Chmp5</i>         | ILMN_2670352 | ILMN_216374 | 3.75 | 0.0000 |
| <i>Mrpl52</i>        | ILMN_2601865 | ILMN_210065 | 3.75 | 0.0000 |
| <i>Twf2</i>          | ILMN_1234388 | ILMN_212893 | 3.74 | 0.0000 |
| <i>Osr1</i>          | ILMN_1259787 | ILMN_213374 | 3.73 | 0.0000 |
| <i>Tnfrsf26</i>      | ILMN_2479124 | ILMN_191444 | 3.73 | 0.0000 |
| <i>Ctsw</i>          | ILMN_2721399 | ILMN_220388 | 3.73 | 0.0001 |
| <i>Fastkd2</i>       | ILMN_2817960 | ILMN_216878 | 3.73 | 0.0000 |
| <i>Sostdc1</i>       | ILMN_2642800 | ILMN_213965 | 3.72 | 0.0001 |
| <i>Scarb1</i>        | ILMN_1223315 | ILMN_213357 | 3.72 | 0.0098 |
| <i>Mtus1</i>         | ILMN_3162801 | ILMN_244329 | 3.72 | 0.0000 |
| <i>Pnliprp2</i>      | ILMN_2692167 | ILMN_218140 | 3.71 | 0.0000 |
| <i>Tex264</i>        | ILMN_1247681 | ILMN_223212 | 3.71 | 0.0002 |
| <i>Ccl6</i>          | ILMN_2694179 | ILMN_218308 | 3.70 | 0.0000 |
| <i>Krtap16-3</i>     | ILMN_2856457 | ILMN_208768 | 3.70 | 0.0000 |
| <i>EG622976</i>      | ILMN_2804283 | ILMN_243733 | 3.70 | 0.0004 |
| <i>Ctnnb1</i>        | ILMN_1249568 | ILMN_212264 | 3.70 | 0.0003 |

|                           |              |             |      |        |
|---------------------------|--------------|-------------|------|--------|
| <i>Dolpp1</i>             | ILMN_2723338 | ILMN_220141 | 3.69 | 0.0001 |
| <i>Atm</i>                | ILMN_2647620 | ILMN_214401 | 3.69 | 0.0040 |
| <i>Tnfrsf11a</i>          | ILMN_2482600 | ILMN_191831 | 3.69 | 0.0000 |
| <i>Ramp3</i>              | ILMN_2749052 | ILMN_222398 | 3.68 | 0.0000 |
| <i>LOC100045280</i>       | ILMN_2634591 | ILMN_323613 | 3.68 | 0.0000 |
| <i>Apip</i>               | ILMN_2799945 | ILMN_208725 | 3.68 | 0.0000 |
| <i>Tyms-ps</i>            | ILMN_2921303 | ILMN_230689 | 3.68 | 0.0003 |
| <i>Ube2q2</i>             | ILMN_2749911 | ILMN_211956 | 3.67 | 0.0002 |
| <i>Tor2a</i>              | ILMN_2519488 | ILMN_195870 | 3.66 | 0.0095 |
| <i>Nfat5</i>              | ILMN_2732123 | ILMN_221186 | 3.66 | 0.0000 |
| <i>1810033M07Rik</i>      | ILMN_2888940 | ILMN_215397 | 3.66 | 0.0002 |
| <i>Rnaset2</i>            | ILMN_3154111 | ILMN_242135 | 3.65 | 0.0000 |
| <i>Wbp7</i>               | ILMN_2699833 | ILMN_231579 | 3.64 | 0.0005 |
| <i>Ighmbp2</i>            | ILMN_2860419 | ILMN_218180 | 3.64 | 0.0001 |
| <i>Scgb1a1</i>            | ILMN_2749152 | ILMN_222406 | 3.64 | 0.0049 |
| <i>Gja3</i>               | ILMN_2632678 | ILMN_213018 | 3.64 | 0.0000 |
| <i>1810049H13Rik</i>      | ILMN_2680665 | ILMN_217236 | 3.64 | 0.0000 |
| <i>Cbr2</i>               | ILMN_2756665 | ILMN_222912 | 3.63 | 0.0052 |
| <i>Tef</i>                | ILMN_2715400 | ILMN_219934 | 3.62 | 0.0001 |
| <i>Slc31a2</i>            | ILMN_2634656 | ILMN_213199 | 3.62 | 0.0006 |
| <i>Ccrl1</i>              | ILMN_1251660 | ILMN_213477 | 3.61 | 0.0000 |
| <i>H2-Ab1</i>             | ILMN_2631423 | ILMN_209838 | 3.61 | 0.0000 |
| <i>Acsn3</i>              | ILMN_3075043 | ILMN_248603 | 3.60 | 0.0001 |
| <i>A930016P21Rik</i>      | ILMN_1224980 | ILMN_257215 | 3.59 | 0.0014 |
| <i>Ccdc98</i>             | ILMN_2758642 | ILMN_223050 | 3.59 | 0.0032 |
| <i>Ghrh</i>               | ILMN_1253853 | ILMN_213432 | 3.59 | 0.0002 |
| <i>Wwc2</i>               | ILMN_2685464 | ILMN_217612 | 3.58 | 0.0000 |
| <i>9030221M09Rik</i>      | ILMN_2718350 | ILMN_211066 | 3.58 | 0.0000 |
| <i>Tsc22d3</i>            | ILMN_3150811 | ILMN_257708 | 3.58 | 0.0001 |
| <i>3200002M19Rik</i>      | ILMN_2711401 | ILMN_247516 | 3.56 | 0.0003 |
| <i>EG634650</i>           | ILMN_2837493 | ILMN_252479 | 3.56 | 0.0000 |
| <i>C4b</i>                | ILMN_3049559 | ILMN_210539 | 3.56 | 0.0000 |
| <i>Gm904</i>              | ILMN_2921438 | ILMN_260240 | 3.55 | 0.0010 |
| <i>Ceacam13</i>           | ILMN_2592257 | ILMN_213925 | 3.55 | 0.0029 |
| <i>Ncapg2</i>             | ILMN_2770723 | ILMN_246953 | 3.55 | 0.0000 |
| <i>4932414J04Rik</i>      | ILMN_1237480 | ILMN_313033 | 3.54 | 0.0000 |
| <i>Irgm</i>               | ILMN_1234539 | ILMN_213497 | 3.54 | 0.0000 |
| <i>Dnmt3b</i>             | ILMN_1252310 | ILMN_236655 | 3.54 | 0.0002 |
| <i>Prmt6</i>              | ILMN_3007271 | ILMN_208707 | 3.53 | 0.0006 |
| <i>Gsk3a</i>              | ILMN_3160897 | ILMN_254737 | 3.53 | 0.0001 |
| <i>Polr3a</i>             | ILMN_1255559 | ILMN_244669 | 3.53 | 0.0001 |
| <i>Calm5</i>              | ILMN_3160926 | ILMN_235729 | 3.52 | 0.0045 |
| <i>Mov10l1</i>            | ILMN_2617219 | ILMN_211569 | 3.52 | 0.0068 |
| <i>OTTMUSG00000015762</i> | ILMN_2932993 | ILMN_249322 | 3.52 | 0.0003 |
| <i>Wbscr27</i>            | ILMN_1235834 | ILMN_194140 | 3.52 | 0.0024 |
| <i>Rbbp7</i>              | ILMN_2691192 | ILMN_215499 | 3.52 | 0.0020 |
| <i>Eef1a2</i>             | ILMN_2645171 | ILMN_214177 | 3.52 | 0.0010 |
| <i>Olfr410</i>            | ILMN_1225411 | ILMN_219502 | 3.51 | 0.0040 |
| <i>Fbxo32</i>             | ILMN_2715893 | ILMN_219973 | 3.51 | 0.0019 |
| <i>Cnbp</i>               | ILMN_2663780 | ILMN_215804 | 3.50 | 0.0081 |

|                      |              |             |      |        |
|----------------------|--------------|-------------|------|--------|
| <i>Sart3</i>         | ILMN_2800297 | ILMN_222751 | 3.50 | 0.0000 |
| <i>Zfp13</i>         | ILMN_2877740 | ILMN_191405 | 3.50 | 0.0008 |
| <i>Cys1</i>          | ILMN_1229578 | ILMN_239582 | 3.49 | 0.0000 |
| <i>Chek2</i>         | ILMN_1247062 | ILMN_213090 | 3.49 | 0.0000 |
| <i>Prune</i>         | ILMN_1252629 | ILMN_213137 | 3.48 | 0.0000 |
| <i>Axl</i>           | ILMN_2651715 | ILMN_214769 | 3.47 | 0.0000 |
| <i>2310036O22Rik</i> | ILMN_1229716 | ILMN_217389 | 3.47 | 0.0000 |
| <i>Rcl1</i>          | ILMN_1254929 | ILMN_220432 | 3.47 | 0.0051 |
| <i>Slc38a2</i>       | ILMN_1244123 | ILMN_217242 | 3.46 | 0.0000 |
| <i>Il18</i>          | ILMN_1236517 | ILMN_223025 | 3.46 | 0.0007 |
| <i>Cyfp2</i>         | ILMN_2670713 | ILMN_214228 | 3.45 | 0.0000 |
| <i>Olfr1156</i>      | ILMN_2738305 | ILMN_221642 | 3.45 | 0.0000 |
| <i>Faah</i>          | ILMN_2657980 | ILMN_215313 | 3.45 | 0.0002 |
| <i>Asah3l</i>        | ILMN_2629112 | ILMN_212677 | 3.45 | 0.0023 |
| <i>Sel1l</i>         | ILMN_1244431 | ILMN_258443 | 3.45 | 0.0047 |
| <i>Hipk3</i>         | ILMN_1253204 | ILMN_222086 | 3.44 | 0.0000 |
| <i>Myh8</i>          | ILMN_2978038 | ILMN_214541 | 3.44 | 0.0001 |
| <i>Scap</i>          | ILMN_2764143 | ILMN_241129 | 3.44 | 0.0001 |
| <i>Cd63</i>          | ILMN_3128907 | ILMN_214933 | 3.44 | 0.0001 |
| <i>Ube1c</i>         | ILMN_2879517 | ILMN_194035 | 3.43 | 0.0010 |
| <i>Dap3</i>          | ILMN_2646230 | ILMN_211847 | 3.43 | 0.0051 |
| <i>Prep</i>          | ILMN_2739760 | ILMN_221743 | 3.43 | 0.0002 |
| <i>Wdr45l</i>        | ILMN_1242852 | ILMN_212583 | 3.43 | 0.0001 |
| <i>1810009A15Rik</i> | ILMN_1221262 | ILMN_218996 | 3.43 | 0.0049 |
| <i>LOC100044275</i>  | ILMN_1253678 | ILMN_329235 | 3.43 | 0.0001 |
| <i>Phactr1</i>       | ILMN_2683499 | ILMN_242055 | 3.42 | 0.0047 |
| <i>Senp7</i>         | ILMN_2706451 | ILMN_259164 | 3.42 | 0.0007 |
| <i>Mbd3l2</i>        | ILMN_2609129 | ILMN_210782 | 3.41 | 0.0000 |
| <i>Gmpr</i>          | ILMN_2602581 | ILMN_210136 | 3.41 | 0.0000 |
| <i>Ovgp1</i>         | ILMN_2600928 | ILMN_209968 | 3.40 | 0.0016 |
| <i>Bach1</i>         | ILMN_2741677 | ILMN_221891 | 3.40 | 0.0017 |
| <i>Nrk</i>           | ILMN_1220907 | ILMN_257470 | 3.40 | 0.0001 |
| <i>Tm9sf3</i>        | ILMN_2603545 | ILMN_256422 | 3.39 | 0.0002 |
| <i>Emp1</i>          | ILMN_2642913 | ILMN_213976 | 3.39 | 0.0003 |
| <i>C130090K23Rik</i> | ILMN_3163255 | ILMN_209707 | 3.39 | 0.0000 |
| <i>Rad51l3</i>       | ILMN_2755140 | ILMN_208658 | 3.39 | 0.0029 |
| <i>Actn2</i>         | ILMN_2797061 | ILMN_223487 | 3.39 | 0.0001 |
| <i>Wars</i>          | ILMN_3156343 | ILMN_184424 | 3.38 | 0.0000 |
| <i>Echdc3</i>        | ILMN_1234901 | ILMN_211941 | 3.38 | 0.0004 |
| <i>Rassf7</i>        | ILMN_2778094 | ILMN_217400 | 3.38 | 0.0000 |
| <i>A830093I24Rik</i> | ILMN_1255757 | ILMN_223276 | 3.37 | 0.0047 |
| <i>Tada3l</i>        | ILMN_2489694 | ILMN_192612 | 3.37 | 0.0000 |
| <i>Dhps</i>          | ILMN_2637241 | ILMN_234246 | 3.37 | 0.0012 |
| <i>Nup155</i>        | ILMN_2695281 | ILMN_253387 | 3.37 | 0.0000 |
| <i>Snpc2</i>         | ILMN_1215174 | ILMN_217540 | 3.37 | 0.0045 |
| <i>Il1rl1</i>        | ILMN_2757617 | ILMN_215312 | 3.37 | 0.0000 |
| <i>Hivep1</i>        | ILMN_2657800 | ILMN_215299 | 3.36 | 0.0000 |
| <i>Nrbp1</i>         | ILMN_1229702 | ILMN_208786 | 3.36 | 0.0017 |
| <i>Csf2</i>          | ILMN_2749412 | ILMN_222423 | 3.35 | 0.0004 |
| <i>Wwc2</i>          | ILMN_2748806 | ILMN_217612 | 3.35 | 0.0017 |

|                     |              |             |      |        |
|---------------------|--------------|-------------|------|--------|
| <i>Hist2h2ab</i>    | ILMN_2785454 | ILMN_196734 | 3.34 | 0.0000 |
| <i>Mfap5</i>        | ILMN_1225835 | ILMN_233307 | 3.34 | 0.0011 |
| <i>Slc38a9</i>      | ILMN_1242435 | ILMN_217616 | 3.34 | 0.0004 |
| <i>Clspn</i>        | ILMN_2858359 | ILMN_212127 | 3.34 | 0.0098 |
| <i>Syt12</i>        | ILMN_1246560 | ILMN_219798 | 3.34 | 0.0004 |
| <i>Arl6ip4</i>      | ILMN_3034691 | ILMN_221776 | 3.34 | 0.0000 |
| <i>V1rj2</i>        | ILMN_2503699 | ILMN_194132 | 3.33 | 0.0066 |
| <i>Ric3</i>         | ILMN_2624193 | ILMN_212228 | 3.32 | 0.0002 |
| <i>LOC100045252</i> | ILMN_2692980 | ILMN_317035 | 3.32 | 0.0005 |
| <i>Utp11l</i>       | ILMN_2720334 | ILMN_220301 | 3.32 | 0.0001 |
| <i>Zfp655</i>       | ILMN_1219539 | ILMN_209693 | 3.32 | 0.0000 |
| <i>Bnpl</i>         | ILMN_2834971 | ILMN_211723 | 3.32 | 0.0027 |
| <i>Pafah1b1</i>     | ILMN_2640401 | ILMN_209398 | 3.31 | 0.0001 |
| <i>Rac2</i>         | ILMN_2600678 | ILMN_209944 | 3.31 | 0.0000 |
| <i>Slitrk1</i>      | ILMN_2961282 | ILMN_260619 | 3.31 | 0.0000 |
| <i>Ckm</i>          | ILMN_2608804 | ILMN_210754 | 3.30 | 0.0000 |
| <i>Car14</i>        | ILMN_2973824 | ILMN_208706 | 3.30 | 0.0009 |
| <i>Rpl4</i>         | ILMN_2631003 | ILMN_212850 | 3.30 | 0.0005 |
| <i>Centb5</i>       | ILMN_1236232 | ILMN_210009 | 3.30 | 0.0033 |
| <i>Ch25h</i>        | ILMN_2702303 | ILMN_218948 | 3.29 | 0.0012 |
| <i>Rfxdc1</i>       | ILMN_2734616 | ILMN_221366 | 3.29 | 0.0010 |
| <i>Col14a1</i>      | ILMN_2591027 | ILMN_208943 | 3.29 | 0.0003 |
| <i>Stk19</i>        | ILMN_1232972 | ILMN_214568 | 3.29 | 0.0000 |
| <i>Usp33</i>        | ILMN_3129526 | ILMN_242196 | 3.29 | 0.0000 |
| <i>LOC100048046</i> | ILMN_2740176 | ILMN_318424 | 3.29 | 0.0000 |
| <i>Tmem121</i>      | ILMN_1231884 | ILMN_216549 | 3.28 | 0.0006 |
| <i>Myc</i>          | ILMN_2623526 | ILMN_210055 | 3.28 | 0.0000 |
| <i>Chkb</i>         | ILMN_2755021 | ILMN_257429 | 3.28 | 0.0001 |
| <i>Rabgap1</i>      | ILMN_3061844 | ILMN_246037 | 3.28 | 0.0006 |
| <i>Mlx</i>          | ILMN_2620510 | ILMN_211894 | 3.28 | 0.0005 |
| <i>Flot2</i>        | ILMN_2688439 | ILMN_211586 | 3.28 | 0.0006 |
| <i>Map2k7</i>       | ILMN_3102163 | ILMN_234235 | 3.27 | 0.0001 |
| <i>Ldb3</i>         | ILMN_3136283 | ILMN_235875 | 3.27 | 0.0036 |
| <i>Mad2l1bp</i>     | ILMN_1221616 | ILMN_216260 | 3.27 | 0.0005 |
| <i>Igfbp6</i>       | ILMN_2689790 | ILMN_217958 | 3.27 | 0.0012 |
| <i>Snapc1</i>       | ILMN_2745849 | ILMN_222181 | 3.25 | 0.0009 |
| <i>Slc2a6</i>       | ILMN_2618918 | ILMN_211726 | 3.25 | 0.0002 |
| <i>Pik3r1</i>       | ILMN_3114641 | ILMN_256560 | 3.25 | 0.0002 |
| <i>Taf5l</i>        | ILMN_2700751 | ILMN_218829 | 3.24 | 0.0006 |
| <i>Pafah1b3</i>     | ILMN_2640971 | ILMN_213804 | 3.24 | 0.0007 |
| <i>C4a</i>          | ILMN_2911128 | ILMN_241215 | 3.23 | 0.0052 |
| <i>Ddt</i>          | ILMN_2596297 | ILMN_209491 | 3.23 | 0.0080 |
| <i>Pop5</i>         | ILMN_2973925 | ILMN_213331 | 3.22 | 0.0000 |
| <i>Zfp143</i>       | ILMN_1214416 | ILMN_246559 | 3.22 | 0.0001 |
| <i>Plekhh1</i>      | ILMN_2933022 | ILMN_221623 | 3.22 | 0.0002 |
| <i>Uhrf1bp1l</i>    | ILMN_1258677 | ILMN_251894 | 3.21 | 0.0002 |
| <i>Snx17</i>        | ILMN_2694926 | ILMN_218375 | 3.21 | 0.0004 |
| <i>Sept6</i>        | ILMN_2663914 | ILMN_212389 | 3.21 | 0.0036 |
| <i>Ptch2</i>        | ILMN_2728710 | ILMN_220926 | 3.20 | 0.0000 |
| <i>Ddb1</i>         | ILMN_2620930 | ILMN_211937 | 3.20 | 0.0001 |



|                      |              |             |      |        |
|----------------------|--------------|-------------|------|--------|
| <i>Grasp</i>         | ILMN_2656031 | ILMN_209500 | 3.20 | 0.0002 |
| <i>Scmh1</i>         | ILMN_2720786 | ILMN_247166 | 3.20 | 0.0002 |
| <i>Alas2</i>         | ILMN_2675874 | ILMN_216832 | 3.19 | 0.0002 |
| <i>Saps3</i>         | ILMN_2698353 | ILMN_218636 | 3.19 | 0.0007 |
| <i>Rex2</i>          | ILMN_3062349 | ILMN_256827 | 3.19 | 0.0009 |
| <i>Tmem45a</i>       | ILMN_2982663 | ILMN_211317 | 3.18 | 0.0002 |
| <i>Psmc2</i>         | ILMN_2682945 | ILMN_217415 | 3.18 | 0.0010 |
| <i>Kcnh3</i>         | ILMN_2726397 | ILMN_220756 | 3.18 | 0.0000 |
| <i>Pde4dip</i>       | ILMN_1215884 | ILMN_228537 | 3.18 | 0.0013 |
| <i>Vegfa</i>         | ILMN_3121255 | ILMN_224512 | 3.18 | 0.0020 |
| <i>Il7</i>           | ILMN_2630852 | ILMN_212833 | 3.18 | 0.0002 |
| <i>Rtn1</i>          | ILMN_2758070 | ILMN_221348 | 3.18 | 0.0017 |
| <i>Gsta2</i>         | ILMN_1248849 | ILMN_196593 | 3.17 | 0.0002 |
| <i>Myl6</i>          | ILMN_2900910 | ILMN_261689 | 3.17 | 0.0005 |
| <i>Cebpg</i>         | ILMN_2972026 | ILMN_234754 | 3.17 | 0.0001 |
| <i>Prmt2</i>         | ILMN_3099751 | ILMN_239396 | 3.16 | 0.0002 |
| <i>Dusp16</i>        | ILMN_3112011 | ILMN_232573 | 3.16 | 0.0002 |
| <i>Smc1a</i>         | ILMN_1220530 | ILMN_210942 | 3.16 | 0.0002 |
| <i>C630011I23</i>    | ILMN_2636990 | ILMN_213430 | 3.16 | 0.0000 |
| <i>Hibch</i>         | ILMN_2635150 | ILMN_213247 | 3.15 | 0.0012 |
| <i>B230339H12Rik</i> | ILMN_2628744 | ILMN_209162 | 3.15 | 0.0033 |
| <i>Camk1</i>         | ILMN_2944939 | ILMN_216496 | 3.15 | 0.0034 |
| <i>Azi2</i>          | ILMN_3082580 | ILMN_240407 | 3.15 | 0.0005 |
| <i>Pik3c2g</i>       | ILMN_3082346 | ILMN_232457 | 3.14 | 0.0000 |
| <i>Ankfn1</i>        | ILMN_3127224 | ILMN_254549 | 3.14 | 0.0022 |
| <i>Htr2a</i>         | ILMN_2725529 | ILMN_214572 | 3.14 | 0.0016 |
| <i>A530023O14Rik</i> | ILMN_2689651 | ILMN_216995 | 3.13 | 0.0002 |
| <i>Noto</i>          | ILMN_2833082 | ILMN_227181 | 3.13 | 0.0006 |
| <i>Zfp488</i>        | ILMN_2808383 | ILMN_255922 | 3.12 | 0.0036 |
| <i>Sftpc</i>         | ILMN_2638865 | ILMN_213605 | 3.12 | 0.0022 |
| <i>Tmem9b</i>        | ILMN_1246495 | ILMN_214538 | 3.11 | 0.0003 |
| <i>Ksr1</i>          | ILMN_2849036 | ILMN_211298 | 3.11 | 0.0000 |
| <i>Lmf1</i>          | ILMN_2655144 | ILMN_215065 | 3.11 | 0.0001 |
| <i>Bmp4</i>          | ILMN_1215252 | ILMN_223427 | 3.11 | 0.0001 |
| <i>Mospd1</i>        | ILMN_3006930 | ILMN_220553 | 3.10 | 0.0019 |
| <i>Il18rap</i>       | ILMN_1221620 | ILMN_218950 | 3.10 | 0.0006 |
| <i>Thap3</i>         | ILMN_2652425 | ILMN_214829 | 3.10 | 0.0000 |
| <i>Tsc22d3</i>       | ILMN_2701664 | ILMN_217937 | 3.10 | 0.0002 |
| <i>Ubl4b</i>         | ILMN_2741322 | ILMN_221861 | 3.10 | 0.0004 |
| <i>Acot8</i>         | ILMN_2738629 | ILMN_215852 | 3.09 | 0.0027 |
| <i>Iqgap1</i>        | ILMN_2654495 | ILMN_192065 | 3.09 | 0.0002 |
| <i>Stag1</i>         | ILMN_1233273 | ILMN_216336 | 3.08 | 0.0001 |
| <i>Myo5b</i>         | ILMN_2610576 | ILMN_210919 | 3.08 | 0.0000 |
| <i>Cnp</i>           | ILMN_2802263 | ILMN_222860 | 3.07 | 0.0028 |
| <i>Rabgap1</i>       | ILMN_3139344 | ILMN_246037 | 3.07 | 0.0072 |
| <i>Scara5</i>        | ILMN_3008068 | ILMN_222294 | 3.06 | 0.0007 |
| <i>Faim</i>          | ILMN_2632976 | ILMN_213047 | 3.06 | 0.0029 |
| <i>Nme5</i>          | ILMN_2696232 | ILMN_256278 | 3.06 | 0.0004 |
| <i>A1747448</i>      | ILMN_1253045 | ILMN_248596 | 3.06 | 0.0017 |
| <i>Sorbs3</i>        | ILMN_2618221 | ILMN_211656 | 3.06 | 0.0000 |

|                      |              |             |      |        |
|----------------------|--------------|-------------|------|--------|
| <i>Pik3r1</i>        | ILMN_2473531 | ILMN_244014 | 3.06 | 0.0003 |
| <i>Bnc2</i>          | ILMN_2885206 | ILMN_220395 | 3.05 | 0.0001 |
| <i>1810010M01Rik</i> | ILMN_2728429 | ILMN_220906 | 3.05 | 0.0096 |
| <i>Dctn2</i>         | ILMN_2859659 | ILMN_217096 | 3.05 | 0.0000 |
| <i>Cdc42ep3</i>      | ILMN_2733185 | ILMN_224538 | 3.05 | 0.0002 |
| <i>Esrrb</i>         | ILMN_1228497 | ILMN_213635 | 3.05 | 0.0092 |
| <i>Cilp</i>          | ILMN_2634430 | ILMN_213174 | 3.05 | 0.0027 |
| <i>Dlgap2</i>        | ILMN_2937486 | ILMN_211933 | 3.05 | 0.0000 |
| <i>Kcnc4</i>         | ILMN_1242025 | ILMN_215081 | 3.04 | 0.0029 |
| <i>Frmf6</i>         | ILMN_2828916 | ILMN_253678 | 3.03 | 0.0002 |
| <i>Ryr1</i>          | ILMN_2730425 | ILMN_226638 | 3.03 | 0.0027 |
| <i>Eml1</i>          | ILMN_1214866 | ILMN_261917 | 3.03 | 0.0030 |
| <i>Frat1</i>         | ILMN_1251022 | ILMN_215812 | 3.03 | 0.0000 |
| <i>Nqo2</i>          | ILMN_2968731 | ILMN_208782 | 3.03 | 0.0005 |
| <i>Mustn1</i>        | ILMN_2658461 | ILMN_215350 | 3.03 | 0.0003 |
| <i>Fnip1</i>         | ILMN_2725155 | ILMN_227968 | 3.03 | 0.0002 |
| <i>Hmgcs2</i>        | ILMN_1216322 | ILMN_219260 | 3.02 | 0.0079 |
| <i>Csnk1g2</i>       | ILMN_2875159 | ILMN_212758 | 3.02 | 0.0033 |
| <i>D9Ertd392e</i>    | ILMN_1227277 | ILMN_193217 | 3.02 | 0.0046 |
| <i>Tnni3k</i>        | ILMN_3096551 | ILMN_193974 | 3.01 | 0.0076 |
| <i>Capns1</i>        | ILMN_2772248 | ILMN_223956 | 3.01 | 0.0079 |
| <i>Mpv17l</i>        | ILMN_2794258 | ILMN_199364 | 3.01 | 0.0065 |
| <i>Slc9a6</i>        | ILMN_2892678 | ILMN_246900 | 3.01 | 0.0040 |
| <i>Slc35b2</i>       | ILMN_1246740 | ILMN_253509 | 3.01 | 0.0002 |
| <i>Clec9a</i>        | ILMN_2929768 | ILMN_223116 | 3.00 | 0.0000 |
| <i>Prrx1</i>         | ILMN_2614463 | ILMN_211302 | 3.00 | 0.0011 |
| <i>Synj2bp</i>       | ILMN_1252068 | ILMN_218270 | 2.99 | 0.0000 |
| <i>Nudt21</i>        | ILMN_2979052 | ILMN_215791 | 2.99 | 0.0072 |
| <i>Lor</i>           | ILMN_1241825 | ILMN_218790 | 2.99 | 0.0007 |
| <i>Olfr1157</i>      | ILMN_2694128 | ILMN_218302 | 2.99 | 0.0037 |
| <i>Rfxank</i>        | ILMN_3125181 | ILMN_228492 | 2.98 | 0.0033 |
| <i>Ppp6c</i>         | ILMN_1242053 | ILMN_230422 | 2.98 | 0.0006 |
| <i>Olfr195</i>       | ILMN_1247436 | ILMN_214501 | 2.98 | 0.0014 |
| <i>4930402E16Rik</i> | ILMN_2696146 | ILMN_249392 | 2.98 | 0.0014 |
| <i>Oxt</i>           | ILMN_2669486 | ILMN_216295 | 2.98 | 0.0014 |
| <i>Ankrd46</i>       | ILMN_1222794 | ILMN_211567 | 2.98 | 0.0095 |
| <i>V1rc22</i>        | ILMN_2484864 | ILMN_191341 | 2.98 | 0.0003 |
| <i>Pax2</i>          | ILMN_2949326 | ILMN_211210 | 2.98 | 0.0000 |
| <i>Ggcx</i>          | ILMN_1249282 | ILMN_212986 | 2.97 | 0.0038 |
| <i>Ccdc51</i>        | ILMN_1248125 | ILMN_220092 | 2.97 | 0.0009 |
| <i>Klrb1b</i>        | ILMN_2646358 | ILMN_196749 | 2.96 | 0.0045 |
| <i>Srm</i>           | ILMN_2809611 | ILMN_211754 | 2.96 | 0.0020 |
| <i>Zbtb22</i>        | ILMN_1233129 | ILMN_190228 | 2.96 | 0.0004 |
| <i>Churc1</i>        | ILMN_2797689 | ILMN_250242 | 2.96 | 0.0049 |
| <i>2300002D11Rik</i> | ILMN_1253600 | ILMN_260547 | 2.95 | 0.0010 |
| <i>Slc1a4</i>        | ILMN_2888552 | ILMN_213958 | 2.94 | 0.0017 |
| <i>Trim33</i>        | ILMN_2514776 | ILMN_188197 | 2.94 | 0.0060 |
| <i>Smad2</i>         | ILMN_1222682 | ILMN_213072 | 2.94 | 0.0007 |
| <i>Cdk2</i>          | ILMN_2770759 | ILMN_256716 | 2.94 | 0.0008 |
| <i>lpmk</i>          | ILMN_2938390 | ILMN_233236 | 2.94 | 0.0064 |

|                      |              |             |      |        |
|----------------------|--------------|-------------|------|--------|
| <i>Camk1d</i>        | ILMN_1220441 | ILMN_253301 | 2.93 | 0.0087 |
| <i>Tpr</i>           | ILMN_2502996 | ILMN_194060 | 2.93 | 0.0048 |
| <i>Olfr1100</i>      | ILMN_1242841 | ILMN_223641 | 2.93 | 0.0034 |
| <i>Col17a1</i>       | ILMN_1216228 | ILMN_221356 | 2.93 | 0.0007 |
| <i>St6galnac6</i>    | ILMN_3131666 | ILMN_215086 | 2.93 | 0.0044 |
| <i>Svil</i>          | ILMN_2662644 | ILMN_215439 | 2.93 | 0.0017 |
| <i>4931440F15Rik</i> | ILMN_2789611 | ILMN_218541 | 2.92 | 0.0001 |
| <i>Sirt3</i>         | ILMN_2737480 | ILMN_221583 | 2.92 | 0.0002 |
| <i>Crim2</i>         | ILMN_2907964 | ILMN_253999 | 2.92 | 0.0012 |
| <i>Abca4</i>         | ILMN_2728706 | ILMN_211540 | 2.91 | 0.0039 |
| <i>Kcna7</i>         | ILMN_2619156 | ILMN_211751 | 2.91 | 0.0005 |
| <i>Naca</i>          | ILMN_2651642 | ILMN_214762 | 2.91 | 0.0003 |
| <i>Ranbp6</i>        | ILMN_2614861 | ILMN_211344 | 2.91 | 0.0003 |
| <i>Plec1</i>         | ILMN_2599783 | ILMN_209851 | 2.91 | 0.0002 |
| <i>Hnrpu</i>         | ILMN_1259775 | ILMN_210101 | 2.90 | 0.0070 |
| <i>Bcl2l11</i>       | ILMN_1229255 | ILMN_222050 | 2.90 | 0.0051 |
| <i>Glr3</i>          | ILMN_1232399 | ILMN_209702 | 2.90 | 0.0026 |
| <i>Hs2st1</i>        | ILMN_2853601 | ILMN_243423 | 2.90 | 0.0041 |
| <i>Olfr347</i>       | ILMN_1242663 | ILMN_220320 | 2.90 | 0.0055 |
| <i>Hpx</i>           | ILMN_2830333 | ILMN_222100 | 2.89 | 0.0009 |
| <i>Impdh1</i>        | ILMN_1216301 | ILMN_214886 | 2.89 | 0.0005 |
| <i>Dclre1c</i>       | ILMN_1240123 | ILMN_216472 | 2.89 | 0.0001 |
| <i>Mark1</i>         | ILMN_1236611 | ILMN_257245 | 2.89 | 0.0000 |
| <i>Vil1</i>          | ILMN_2518406 | ILMN_195755 | 2.88 | 0.0036 |
| <i>Sec61a1</i>       | ILMN_3162476 | ILMN_219727 | 2.88 | 0.0066 |
| <i>Ankrd13a</i>      | ILMN_2613696 | ILMN_259897 | 2.88 | 0.0084 |
| <i>Rad51c</i>        | ILMN_2748321 | ILMN_247761 | 2.87 | 0.0003 |
| <i>Cpb2</i>          | ILMN_2905902 | ILMN_208958 | 2.87 | 0.0005 |
| <i>Nkx2-1</i>        | ILMN_1260212 | ILMN_208673 | 2.87 | 0.0015 |
| <i>Cd63</i>          | ILMN_3052430 | ILMN_214933 | 2.87 | 0.0010 |
| <i>Tm2d3</i>         | ILMN_2608574 | ILMN_208638 | 2.87 | 0.0030 |
| <i>Olfr1339</i>      | ILMN_2752937 | ILMN_229602 | 2.87 | 0.0048 |
| <i>Rcor2</i>         | ILMN_1214713 | ILMN_221340 | 2.86 | 0.0036 |
| <i>D11Wsu47e</i>     | ILMN_2700833 | ILMN_218836 | 2.86 | 0.0023 |
| <i>BC018242</i>      | ILMN_2757716 | ILMN_222987 | 2.86 | 0.0015 |
| <i>Sep15</i>         | ILMN_1249836 | ILMN_251840 | 2.86 | 0.0024 |
| <i>Zfp273</i>        | ILMN_1232296 | ILMN_250512 | 2.86 | 0.0012 |
| <i>Prss8</i>         | ILMN_2846148 | ILMN_221829 | 2.86 | 0.0069 |
| <i>Kcnk5</i>         | ILMN_2982781 | ILMN_218669 | 2.85 | 0.0041 |
| <i>Thoc3</i>         | ILMN_2888342 | ILMN_222955 | 2.84 | 0.0014 |
| <i>Gm1821</i>        | ILMN_3157823 | ILMN_243605 | 2.84 | 0.0009 |
| <i>Ptpr</i>          | ILMN_2665459 | ILMN_215941 | 2.84 | 0.0009 |
| <i>Gm129</i>         | ILMN_3102736 | ILMN_243152 | 2.84 | 0.0040 |
| <i>Aasdh</i>         | ILMN_1221418 | ILMN_222321 | 2.84 | 0.0058 |
| <i>Cnot6l</i>        | ILMN_2642671 | ILMN_220697 | 2.83 | 0.0041 |
| <i>Phldb1</i>        | ILMN_2615534 | ILMN_211406 | 2.83 | 0.0008 |
| <i>Ankrd23</i>       | ILMN_2741117 | ILMN_221842 | 2.83 | 0.0058 |
| <i>LOC100044159</i>  | ILMN_2599145 | ILMN_320773 | 2.83 | 0.0073 |
| <i>9430041017Rik</i> | ILMN_1236413 | ILMN_212896 | 2.82 | 0.0011 |
| <i>Tenc1</i>         | ILMN_2744164 | ILMN_208700 | 2.82 | 0.0062 |

|                     |              |             |      |        |
|---------------------|--------------|-------------|------|--------|
| <i>Tegt</i>         | ILMN_2697248 | ILMN_218556 | 2.82 | 0.0004 |
| <i>Dhx35</i>        | ILMN_2861225 | ILMN_220803 | 2.82 | 0.0057 |
| <i>Tmem102</i>      | ILMN_1245382 | ILMN_256383 | 2.82 | 0.0051 |
| <i>Tacc2</i>        | ILMN_2738739 | ILMN_244476 | 2.81 | 0.0000 |
| <i>Olfr676</i>      | ILMN_1256438 | ILMN_220059 | 2.81 | 0.0005 |
| <i>Bri3</i>         | ILMN_2700334 | ILMN_218796 | 2.80 | 0.0001 |
| <i>Htatip2</i>      | ILMN_2603837 | ILMN_210264 | 2.80 | 0.0015 |
| <i>Trim44</i>       | ILMN_1231217 | ILMN_189102 | 2.80 | 0.0006 |
| <i>Nnmt</i>         | ILMN_2885277 | ILMN_215936 | 2.80 | 0.0042 |
| <i>Txlnb</i>        | ILMN_2886610 | ILMN_211914 | 2.80 | 0.0021 |
| <i>Klf7</i>         | ILMN_1251426 | ILMN_225175 | 2.79 | 0.0066 |
| <i>Pou2f1</i>       | ILMN_3127178 | ILMN_218154 | 2.79 | 0.0030 |
| <i>Sbno2</i>        | ILMN_2638333 | ILMN_213561 | 2.79 | 0.0035 |
| <i>Gng2</i>         | ILMN_3143604 | ILMN_236937 | 2.79 | 0.0085 |
| <i>Lin54</i>        | ILMN_2793616 | ILMN_215463 | 2.79 | 0.0013 |
| <i>EG317677</i>     | ILMN_2929594 | ILMN_213670 | 2.79 | 0.0026 |
| <i>Slc12a3</i>      | ILMN_2756550 | ILMN_254166 | 2.79 | 0.0002 |
| <i>Ddhd1</i>        | ILMN_3163148 | ILMN_249923 | 2.78 | 0.0014 |
| <i>Pgpep1</i>       | ILMN_2846255 | ILMN_209658 | 2.78 | 0.0079 |
| <i>Zfp202</i>       | ILMN_1223591 | ILMN_192577 | 2.78 | 0.0005 |
| <i>Nsun5</i>        | ILMN_2796028 | ILMN_210282 | 2.78 | 0.0000 |
| <i>Usp16</i>        | ILMN_2491301 | ILMN_192783 | 2.78 | 0.0014 |
| <i>Zfp428</i>       | ILMN_1228583 | ILMN_240402 | 2.78 | 0.0083 |
| <i>Boc</i>          | ILMN_1241005 | ILMN_223229 | 2.78 | 0.0001 |
| <i>Zfp324</i>       | ILMN_2687195 | ILMN_238165 | 2.78 | 0.0000 |
| <i>Tardbp</i>       | ILMN_3029953 | ILMN_211677 | 2.77 | 0.0030 |
| <i>Pik3ap1</i>      | ILMN_2590736 | ILMN_208912 | 2.77 | 0.0008 |
| <i>Pfn3</i>         | ILMN_2610314 | ILMN_210897 | 2.77 | 0.0006 |
| <i>Vgll2</i>        | ILMN_2909248 | ILMN_185749 | 2.76 | 0.0061 |
| <i>Adra1b</i>       | ILMN_2606415 | ILMN_190038 | 2.76 | 0.0043 |
| <i>Kng2</i>         | ILMN_3126522 | ILMN_199376 | 2.76 | 0.0025 |
| <i>Wnt10b</i>       | ILMN_2422848 | ILMN_184938 | 2.76 | 0.0029 |
| <i>Tmem162</i>      | ILMN_1233860 | ILMN_219091 | 2.76 | 0.0001 |
| <i>Usp25</i>        | ILMN_1226508 | ILMN_189583 | 2.76 | 0.0092 |
| <i>Hcrt</i>         | ILMN_2592983 | ILMN_209147 | 2.76 | 0.0006 |
| <i>Hdc</i>          | ILMN_2965903 | ILMN_242858 | 2.76 | 0.0062 |
| <i>Clec4a3</i>      | ILMN_2606619 | ILMN_210538 | 2.75 | 0.0031 |
| <i>Serpinb12</i>    | ILMN_3140610 | ILMN_220564 | 2.75 | 0.0030 |
| <i>Ube2q1</i>       | ILMN_1247833 | ILMN_191561 | 2.75 | 0.0002 |
| <i>Epdr1</i>        | ILMN_1225494 | ILMN_214840 | 2.75 | 0.0066 |
| <i>Trim35</i>       | ILMN_2445989 | ILMN_187656 | 2.74 | 0.0023 |
| <i>Eif5a</i>        | ILMN_2686044 | ILMN_217074 | 2.74 | 0.0029 |
| <i>Orc4l</i>        | ILMN_2689513 | ILMN_209879 | 2.73 | 0.0016 |
| <i>Slc35e3</i>      | ILMN_2619574 | ILMN_247158 | 2.73 | 0.0010 |
| <i>Gtrgeo22</i>     | ILMN_2592095 | ILMN_209052 | 2.73 | 0.0042 |
| <i>Glycam1</i>      | ILMN_2640849 | ILMN_213794 | 2.73 | 0.0023 |
| <i>Olfr473</i>      | ILMN_1219139 | ILMN_221584 | 2.73 | 0.0004 |
| <i>Theg</i>         | ILMN_2749394 | ILMN_222422 | 2.72 | 0.0008 |
| <i>Figla</i>        | ILMN_2854992 | ILMN_215962 | 2.72 | 0.0009 |
| <i>LOC100041585</i> | ILMN_1249590 | ILMN_317487 | 2.72 | 0.0010 |

|                      |              |             |      |        |
|----------------------|--------------|-------------|------|--------|
| <i>Aatf</i>          | ILMN_3122864 | ILMN_212076 | 2.72 | 0.0028 |
| <i>Rab12</i>         | ILMN_1232851 | ILMN_247938 | 2.71 | 0.0098 |
| <i>Lonrf1</i>        | ILMN_3111383 | ILMN_228296 | 2.71 | 0.0062 |
| <i>D130059P03Rik</i> | ILMN_2709787 | ILMN_208640 | 2.71 | 0.0022 |
| <i>Tpsab1</i>        | ILMN_2705860 | ILMN_219221 | 2.70 | 0.0037 |
| <i>Hsd11b2</i>       | ILMN_2731265 | ILMN_239314 | 2.70 | 0.0036 |
| <i>9930023K05Rik</i> | ILMN_1250913 | ILMN_216333 | 2.70 | 0.0032 |
| <i>Btn2a2</i>        | ILMN_1216723 | ILMN_213941 | 2.69 | 0.0002 |
| <i>Zmynd19</i>       | ILMN_1257785 | ILMN_191630 | 2.69 | 0.0028 |
| <i>Pkd2</i>          | ILMN_2866327 | ILMN_220788 | 2.69 | 0.0030 |
| <i>Lnpep</i>         | ILMN_1242150 | ILMN_209487 | 2.68 | 0.0018 |
| <i>Ykt6</i>          | ILMN_1246405 | ILMN_219090 | 2.67 | 0.0031 |
| <i>2410015M20Rik</i> | ILMN_1230931 | ILMN_210022 | 2.67 | 0.0033 |
| <i>Pnrc2</i>         | ILMN_2861335 | ILMN_221033 | 2.67 | 0.0015 |
| <i>LOC100044829</i>  | ILMN_1215147 | ILMN_310045 | 2.66 | 0.0069 |
| <i>Atp5s</i>         | ILMN_2642158 | ILMN_213913 | 2.66 | 0.0064 |
| <i>Clec1b</i>        | ILMN_2749280 | ILMN_210411 | 2.66 | 0.0031 |
| <i>Pnpo</i>          | ILMN_2855792 | ILMN_216152 | 2.66 | 0.0049 |
| <i>Elmo2</i>         | ILMN_3135409 | ILMN_207476 | 2.66 | 0.0003 |
| <i>Timm8a1</i>       | ILMN_2896552 | ILMN_223570 | 2.66 | 0.0019 |
| <i>Tbx20</i>         | ILMN_2601336 | ILMN_210011 | 2.66 | 0.0027 |
| <i>Nup133</i>        | ILMN_2719266 | ILMN_214967 | 2.66 | 0.0002 |
| <i>B230339M05Rik</i> | ILMN_2894574 | ILMN_260273 | 2.65 | 0.0006 |
| <i>C330027C09Rik</i> | ILMN_2647961 | ILMN_214430 | 2.65 | 0.0019 |
| <i>Mtnr1a</i>        | ILMN_1256388 | ILMN_218773 | 2.65 | 0.0009 |
| <i>9530066K23Rik</i> | ILMN_2844642 | ILMN_209760 | 2.65 | 0.0050 |
| <i>Lin7c</i>         | ILMN_2669869 | ILMN_253981 | 2.64 | 0.0018 |
| <i>Paip2</i>         | ILMN_1258515 | ILMN_212185 | 2.64 | 0.0050 |
| <i>AW551984</i>      | ILMN_2721980 | ILMN_220435 | 2.64 | 0.0026 |
| <i>Bmpr1b</i>        | ILMN_1216262 | ILMN_209303 | 2.63 | 0.0024 |
| <i>Hrsp12</i>        | ILMN_2610703 | ILMN_210108 | 2.63 | 0.0079 |
| <i>Pcdhgc3</i>       | ILMN_2890002 | ILMN_236578 | 2.62 | 0.0018 |
| <i>Rab5b</i>         | ILMN_3163335 | ILMN_260688 | 2.62 | 0.0060 |
| <i>Usp1</i>          | ILMN_1240950 | ILMN_185240 | 2.62 | 0.0045 |
| <i>Tctn3</i>         | ILMN_1224799 | ILMN_210189 | 2.62 | 0.0001 |
| <i>Sucla2</i>        | ILMN_2596942 | ILMN_241666 | 2.61 | 0.0051 |
| <i>Tmem184a</i>      | ILMN_1242101 | ILMN_214733 | 2.61 | 0.0048 |
| <i>Scp2</i>          | ILMN_1221684 | ILMN_211436 | 2.60 | 0.0027 |
| <i>Epn2</i>          | ILMN_3158060 | ILMN_235437 | 2.60 | 0.0043 |
| <i>AW111922</i>      | ILMN_2612776 | ILMN_210056 | 2.60 | 0.0010 |
| <i>BC043934</i>      | ILMN_1253937 | ILMN_219229 | 2.60 | 0.0011 |
| <i>Cog4</i>          | ILMN_1228129 | ILMN_213878 | 2.59 | 0.0058 |
| <i>Alg9</i>          | ILMN_2609495 | ILMN_210816 | 2.59 | 0.0049 |
| <i>Commd1</i>        | ILMN_1215639 | ILMN_219841 | 2.58 | 0.0037 |
| <i>Asah1</i>         | ILMN_1231966 | ILMN_211541 | 2.58 | 0.0006 |
| <i>Tcf20</i>         | ILMN_2763781 | ILMN_201560 | 2.58 | 0.0010 |
| <i>Dnmbp</i>         | ILMN_1218651 | ILMN_220754 | 2.58 | 0.0018 |
| <i>Snx14</i>         | ILMN_2619249 | ILMN_211759 | 2.58 | 0.0046 |
| <i>Trex1</i>         | ILMN_2509737 | ILMN_249588 | 2.58 | 0.0066 |
| <i>Slc12a6</i>       | ILMN_1213275 | ILMN_214309 | 2.58 | 0.0010 |

|                           |              |             |      |        |
|---------------------------|--------------|-------------|------|--------|
| <i>Flt1</i>               | ILMN_2732721 | ILMN_219641 | 2.57 | 0.0020 |
| <i>Chst8</i>              | ILMN_2643049 | ILMN_213991 | 2.57 | 0.0019 |
| <i>Sparcl1</i>            | ILMN_1237917 | ILMN_215660 | 2.57 | 0.0021 |
| <i>AA467197</i>           | ILMN_3160750 | ILMN_236731 | 2.57 | 0.0010 |
| <i>Tctn3</i>              | ILMN_2932474 | ILMN_210189 | 2.57 | 0.0017 |
| <i>Gm711</i>              | ILMN_2641920 | ILMN_213893 | 2.57 | 0.0023 |
| <i>Gnaq</i>               | ILMN_2658443 | ILMN_230615 | 2.56 | 0.0029 |
| <i>Rps24</i>              | ILMN_2625060 | ILMN_237874 | 2.56 | 0.0093 |
| <i>Gfra3</i>              | ILMN_3102260 | ILMN_211590 | 2.56 | 0.0075 |
| <i>Traf3</i>              | ILMN_3144289 | ILMN_186921 | 2.56 | 0.0062 |
| <i>LOC235033</i>          | ILMN_2533387 | ILMN_198917 | 2.56 | 0.0058 |
| <i>Whdc1</i>              | ILMN_3160616 | ILMN_234611 | 2.56 | 0.0078 |
| <i>Neu4</i>               | ILMN_2605810 | ILMN_210458 | 2.56 | 0.0021 |
| <i>Mgea6</i>              | ILMN_1259488 | ILMN_199381 | 2.56 | 0.0005 |
| <i>A730008L03Rik</i>      | ILMN_2873174 | ILMN_215122 | 2.55 | 0.0023 |
| <i>Slc10a6</i>            | ILMN_2636624 | ILMN_213394 | 2.54 | 0.0074 |
| <i>Dom3z</i>              | ILMN_1233838 | ILMN_214924 | 2.53 | 0.0014 |
| <i>OTTMUSG00000015529</i> | ILMN_1238850 | ILMN_223581 | 2.53 | 0.0009 |
| <i>Pde4dip</i>            | ILMN_3064283 | ILMN_228537 | 2.53 | 0.0033 |
| <i>Gsdmc1</i>             | ILMN_1240230 | ILMN_199368 | 2.53 | 0.0029 |
| <i>Sult5a1</i>            | ILMN_2731020 | ILMN_221092 | 2.52 | 0.0026 |
| <i>Dars</i>               | ILMN_2589477 | ILMN_208784 | 2.52 | 0.0070 |
| <i>Tmed10</i>             | ILMN_3002943 | ILMN_239113 | 2.52 | 0.0016 |
| <i>Ifng</i>               | ILMN_2791459 | ILMN_217631 | 2.52 | 0.0074 |
| <i>Hpcal4</i>             | ILMN_2662054 | ILMN_215652 | 2.52 | 0.0060 |
| <i>Cyp2b10</i>            | ILMN_2594926 | ILMN_230152 | 2.52 | 0.0007 |
| <i>Wdr62</i>              | ILMN_1241754 | ILMN_249747 | 2.52 | 0.0004 |
| <i>Nipsnap3a</i>          | ILMN_2657376 | ILMN_209109 | 2.52 | 0.0036 |
| <i>Btdb3</i>              | ILMN_2599955 | ILMN_209090 | 2.52 | 0.0051 |
| <i>Pms2</i>               | ILMN_2707947 | ILMN_219373 | 2.51 | 0.0005 |
| <i>Tbc1d22a</i>           | ILMN_2767791 | ILMN_223698 | 2.51 | 0.0005 |
| <i>Rassf4</i>             | ILMN_2956095 | ILMN_213302 | 2.51 | 0.0057 |
| <i>Hsd17b11</i>           | ILMN_2705361 | ILMN_213984 | 2.51 | 0.0035 |
| <i>Ddef2</i>              | ILMN_3046047 | ILMN_239548 | 2.51 | 0.0099 |
| <i>Adprhl1</i>            | ILMN_1257998 | ILMN_209406 | 2.50 | 0.0028 |
| <i>Dusp21</i>             | ILMN_1213939 | ILMN_251757 | 2.50 | 0.0061 |
| <i>Epn2</i>               | ILMN_1218487 | ILMN_235437 | 2.49 | 0.0011 |
| <i>Cugbp1</i>             | ILMN_2726496 | ILMN_220762 | 2.49 | 0.0016 |
| <i>1200013P24Rik</i>      | ILMN_1245322 | ILMN_219220 | 2.48 | 0.0008 |
| <i>Olfr459</i>            | ILMN_1252811 | ILMN_213676 | 2.48 | 0.0043 |
| <i>Adfp</i>               | ILMN_1222246 | ILMN_223620 | 2.48 | 0.0033 |
| <i>Calcl</i>              | ILMN_1235390 | ILMN_209412 | 2.47 | 0.0082 |
| <i>Slc1a1</i>             | ILMN_1225873 | ILMN_208829 | 2.47 | 0.0011 |
| <i>Raet1e</i>             | ILMN_1231358 | ILMN_201534 | 2.47 | 0.0001 |
| <i>4930544G21Rik</i>      | ILMN_2841307 | ILMN_243701 | 2.46 | 0.0026 |
| <i>Lims2</i>              | ILMN_2942674 | ILMN_221324 | 2.46 | 0.0081 |
| <i>Zfp791</i>             | ILMN_2990485 | ILMN_234512 | 2.46 | 0.0066 |
| <i>Scgb3a1</i>            | ILMN_2658200 | ILMN_215331 | 2.46 | 0.0050 |
| <i>Mid1</i>               | ILMN_3080065 | ILMN_242848 | 2.46 | 0.0037 |
| <i>Cd2</i>                | ILMN_2753697 | ILMN_222706 | 2.46 | 0.0065 |

|                      |              |             |      |        |
|----------------------|--------------|-------------|------|--------|
| <i>Slc14a1</i>       | ILMN_1235006 | ILMN_246276 | 2.46 | 0.0087 |
| <i>2610109H07Rik</i> | ILMN_3018201 | ILMN_236248 | 2.45 | 0.0056 |
| <i>Vps16</i>         | ILMN_2420505 | ILMN_184664 | 2.45 | 0.0034 |
| <i>Stag2</i>         | ILMN_3123970 | ILMN_257297 | 2.45 | 0.0066 |
| <i>Abcf1</i>         | ILMN_2760415 | ILMN_218252 | 2.45 | 0.0081 |
| <i>Birc2</i>         | ILMN_1226186 | ILMN_240777 | 2.44 | 0.0042 |
| <i>4732418C07Rik</i> | ILMN_2692060 | ILMN_215708 | 2.43 | 0.0061 |
| <i>Mon1a</i>         | ILMN_2607297 | ILMN_210601 | 2.43 | 0.0072 |
| <i>Kcnh2</i>         | ILMN_1244402 | ILMN_213233 | 2.43 | 0.0032 |
| <i>2010100O12Rik</i> | ILMN_2670427 | ILMN_214419 | 2.43 | 0.0053 |
| <i>Cd83</i>          | ILMN_2865016 | ILMN_215128 | 2.43 | 0.0085 |
| <i>Olfr43</i>        | ILMN_2589171 | ILMN_208751 | 2.43 | 0.0014 |
| <i>Rbm6</i>          | ILMN_1252216 | ILMN_212268 | 2.42 | 0.0036 |
| <i>Aup1</i>          | ILMN_2682623 | ILMN_234129 | 2.42 | 0.0079 |
| <i>Ms4a5</i>         | ILMN_2726615 | ILMN_220769 | 2.42 | 0.0016 |
| <i>Actr1b</i>        | ILMN_3161327 | ILMN_230692 | 2.42 | 0.0054 |
| <i>B430211C08Rik</i> | ILMN_2901576 | ILMN_244026 | 2.42 | 0.0045 |
| <i>Ccdc127</i>       | ILMN_2932814 | ILMN_214991 | 2.41 | 0.0034 |
| <i>Tsc22d1</i>       | ILMN_2677878 | ILMN_216991 | 2.41 | 0.0019 |
| <i>Gzmn</i>          | ILMN_1229426 | ILMN_196570 | 2.41 | 0.0009 |
| <i>Palm2</i>         | ILMN_2670330 | ILMN_210672 | 2.41 | 0.0041 |
| <i>Sfmbt2</i>        | ILMN_2659651 | ILMN_193443 | 2.41 | 0.0041 |
| <i>Ubb</i>           | ILMN_2516699 | ILMN_195563 | 2.40 | 0.0080 |
| <i>Brd2</i>          | ILMN_2751505 | ILMN_252658 | 2.40 | 0.0014 |
| <i>Srr</i>           | ILMN_2622605 | ILMN_212090 | 2.40 | 0.0033 |
| <i>Hes6</i>          | ILMN_2608043 | ILMN_210674 | 2.40 | 0.0010 |
| <i>Pigt</i>          | ILMN_2868131 | ILMN_252543 | 2.40 | 0.0088 |
| <i>Casp9</i>         | ILMN_1217061 | ILMN_212974 | 2.39 | 0.0015 |
| <i>Fabp6</i>         | ILMN_2826304 | ILMN_222022 | 2.39 | 0.0016 |
| <i>Pou5f1</i>        | ILMN_1252910 | ILMN_216259 | 2.39 | 0.0073 |
| <i>V1rg8</i>         | ILMN_1256776 | ILMN_184774 | 2.38 | 0.0081 |
| <i>LOC100048332</i>  | ILMN_2717496 | ILMN_317679 | 2.38 | 0.0096 |
| <i>8030451F13Rik</i> | ILMN_2739266 | ILMN_256951 | 2.38 | 0.0069 |
| <i>Slc5a10</i>       | ILMN_1222016 | ILMN_228817 | 2.37 | 0.0062 |
| <i>Mmp12</i>         | ILMN_1250421 | ILMN_255926 | 2.37 | 0.0056 |
| <i>Steap4</i>        | ILMN_2657297 | ILMN_209928 | 2.37 | 0.0055 |
| <i>Prkcdbp</i>       | ILMN_1243602 | ILMN_214335 | 2.37 | 0.0022 |
| <i>Timm22</i>        | ILMN_2589359 | ILMN_208771 | 2.37 | 0.0038 |
| <i>Hfe2</i>          | ILMN_2688092 | ILMN_217829 | 2.36 | 0.0021 |
| <i>EG434858</i>      | ILMN_3084883 | ILMN_233946 | 2.36 | 0.0012 |
| <i>Errfi1</i>        | ILMN_2714031 | ILMN_246139 | 2.36 | 0.0086 |
| <i>Sil1</i>          | ILMN_2720930 | ILMN_220348 | 2.36 | 0.0081 |
| <i>Pmm2</i>          | ILMN_2858742 | ILMN_261882 | 2.36 | 0.0013 |
| <i>Ift122</i>        | ILMN_2429970 | ILMN_185784 | 2.35 | 0.0045 |
| <i>Mfge8</i>         | ILMN_3133448 | ILMN_228582 | 2.34 | 0.0079 |
| <i>Olfr1263</i>      | ILMN_1231085 | ILMN_216791 | 2.33 | 0.0018 |
| <i>Bmp10</i>         | ILMN_2935098 | ILMN_255512 | 2.33 | 0.0062 |
| <i>Olfr1080</i>      | ILMN_1248928 | ILMN_216797 | 2.33 | 0.0018 |
| <i>Kctd15</i>        | ILMN_2655869 | ILMN_215130 | 2.31 | 0.0046 |
| <i>V1rg4</i>         | ILMN_2460929 | ILMN_189399 | 2.31 | 0.0086 |

|                      |              |             |      |        |
|----------------------|--------------|-------------|------|--------|
| <i>LOC100048221</i>  | ILMN_2748584 | ILMN_314100 | 2.31 | 0.0043 |
| <i>Gp38</i>          | ILMN_2654754 | ILMN_215032 | 2.31 | 0.0038 |
| <i>2310042D19Rik</i> | ILMN_2957987 | ILMN_217547 | 2.30 | 0.0094 |
| <i>Zfp597</i>        | ILMN_3160688 | ILMN_260846 | 2.29 | 0.0086 |
| <i>3300001P08Rik</i> | ILMN_2798797 | ILMN_213598 | 2.28 | 0.0069 |
| <i>Adora1</i>        | ILMN_3065420 | ILMN_238585 | 2.28 | 0.0064 |
| <i>2610020H08Rik</i> | ILMN_2743616 | ILMN_222027 | 2.28 | 0.0008 |
| <i>Zbp2</i>          | ILMN_2757923 | ILMN_211909 | 2.28 | 0.0052 |
| <i>B930076A02</i>    | ILMN_1214060 | ILMN_210034 | 2.27 | 0.0027 |
| <i>Bhmt</i>          | ILMN_2620994 | ILMN_225088 | 2.27 | 0.0007 |
| <i>AA673488</i>      | ILMN_3059135 | ILMN_239401 | 2.27 | 0.0003 |
| <i>EG237009</i>      | ILMN_2739355 | ILMN_321979 | 2.27 | 0.0010 |
| <i>Zbbx</i>          | ILMN_2707676 | ILMN_219361 | 2.27 | 0.0008 |
| <i>C9</i>            | ILMN_2594846 | ILMN_209337 | 2.26 | 0.0015 |
| <i>9830002I17Rik</i> | ILMN_2732757 | ILMN_221228 | 2.26 | 0.0096 |
| <i>Sntb2</i>         | ILMN_1217790 | ILMN_218207 | 2.26 | 0.0084 |
| <i>Spata3</i>        | ILMN_2706809 | ILMN_219287 | 2.25 | 0.0089 |
| <i>Ank3</i>          | ILMN_1223963 | ILMN_252240 | 2.24 | 0.0011 |
| <i>Apoa2</i>         | ILMN_1247156 | ILMN_216506 | 2.24 | 0.0082 |
| <i>Fgfbp3</i>        | ILMN_2628999 | ILMN_212665 | 2.23 | 0.0025 |
| <i>9030227G01Rik</i> | ILMN_2686433 | ILMN_209828 | 2.23 | 0.0058 |
| <i>Obrgrp</i>        | ILMN_2603568 | ILMN_210235 | 2.23 | 0.0049 |
| <i>Adam4</i>         | ILMN_1235132 | ILMN_220039 | 2.23 | 0.0012 |
| <i>Asph</i>          | ILMN_2776700 | ILMN_209310 | 2.22 | 0.0096 |
| <i>Pcdh1</i>         | ILMN_2597660 | ILMN_209630 | 2.22 | 0.0067 |
| <i>Nup155</i>        | ILMN_1235035 | ILMN_253387 | 2.22 | 0.0029 |
| <i>Oca2</i>          | ILMN_2475689 | ILMN_191055 | 2.22 | 0.0033 |
| <i>5730577I03Rik</i> | ILMN_2794628 | ILMN_222559 | 2.21 | 0.0060 |
| <i>Gipc1</i>         | ILMN_1254924 | ILMN_209294 | 2.21 | 0.0018 |
| <i>Pabpc1</i>        | ILMN_2705407 | ILMN_201529 | 2.21 | 0.0080 |
| <i>Pank1</i>         | ILMN_2868013 | ILMN_222263 | 2.21 | 0.0056 |
| <i>Col4a3bp</i>      | ILMN_2613636 | ILMN_261277 | 2.20 | 0.0037 |
| <i>Ccr10</i>         | ILMN_1230042 | ILMN_212484 | 2.19 | 0.0087 |
| <i>Rfc3</i>          | ILMN_2726047 | ILMN_220736 | 2.19 | 0.0014 |
| <i>Pgls</i>          | ILMN_2664548 | ILMN_215862 | 2.19 | 0.0057 |
| <i>Lce1b</i>         | ILMN_2872965 | ILMN_216467 | 2.18 | 0.0035 |
| <i>MGC107098</i>     | ILMN_2922284 | ILMN_255921 | 2.18 | 0.0046 |
| <i>Sgk2</i>          | ILMN_2827081 | ILMN_215694 | 2.17 | 0.0076 |
| <i>Tfpt</i>          | ILMN_2877706 | ILMN_212710 | 2.17 | 0.0030 |
| <i>Serpina1a</i>     | ILMN_2777493 | ILMN_230055 | 2.17 | 0.0067 |
| <i>Kctd6</i>         | ILMN_1247335 | ILMN_219998 | 2.17 | 0.0066 |
| <i>Olf1454</i>       | ILMN_2947960 | ILMN_218191 | 2.16 | 0.0040 |
| <i>Hmx3</i>          | ILMN_2790983 | ILMN_214402 | 2.16 | 0.0086 |
| <i>Rpl14</i>         | ILMN_1227142 | ILMN_216057 | 2.16 | 0.0021 |
| <i>1810015C04Rik</i> | ILMN_2745614 | ILMN_222164 | 2.15 | 0.0084 |
| <i>Slc12a3</i>       | ILMN_1229114 | ILMN_254166 | 2.15 | 0.0028 |
| <i>Nkiras1</i>       | ILMN_2656189 | ILMN_214595 | 2.14 | 0.0058 |
| <i>Dhdds</i>         | ILMN_2691067 | ILMN_213516 | 2.13 | 0.0073 |
| <i>Atp1b4</i>        | ILMN_2768612 | ILMN_223752 | 2.13 | 0.0009 |
| <i>Bcl11a</i>        | ILMN_2712044 | ILMN_228019 | 2.13 | 0.0066 |



|                      |              |             |       |        |
|----------------------|--------------|-------------|-------|--------|
| <i>Ifi27</i>         | ILMN_2762944 | ILMN_239930 | 2.13  | 0.0089 |
| <i>Slc11a1</i>       | ILMN_2692797 | ILMN_254692 | 2.13  | 0.0033 |
| <i>Nkx2-5</i>        | ILMN_2727695 | ILMN_220848 | 2.12  | 0.0012 |
| <i>LOC229571</i>     | ILMN_2894763 | ILMN_229890 | 2.12  | 0.0001 |
| <i>Mfn1</i>          | ILMN_2950837 | ILMN_220222 | 2.12  | 0.0098 |
| <i>Abca1</i>         | ILMN_1226851 | ILMN_215646 | 2.11  | 0.0035 |
| <i>Zfp111</i>        | ILMN_2836698 | ILMN_187476 | 2.11  | 0.0042 |
| <i>Lefty2</i>        | ILMN_2713164 | ILMN_219748 | 2.10  | 0.0066 |
| <i>Ebi2</i>          | ILMN_1220101 | ILMN_223731 | 2.10  | 0.0047 |
| <i>Hgf</i>           | ILMN_2729117 | ILMN_220957 | 2.10  | 0.0053 |
| <i>Prdx5</i>         | ILMN_2637233 | ILMN_224724 | 2.08  | 0.0087 |
| <i>Isl2</i>          | ILMN_1243489 | ILMN_221871 | 2.06  | 0.0042 |
| <i>BC025816</i>      | ILMN_2697238 | ILMN_218555 | 2.05  | 0.0060 |
| <i>Zc3h3</i>         | ILMN_2507227 | ILMN_185104 | 2.04  | 0.0030 |
| <i>Olfr137</i>       | ILMN_1241505 | ILMN_218146 | 2.03  | 0.0063 |
| <i>Akap3</i>         | ILMN_2614990 | ILMN_211355 | 2.03  | 0.0090 |
| <i>Phxr5</i>         | ILMN_2712756 | ILMN_327634 | 1.99  | 0.0063 |
| <i>Csnk2a1</i>       | ILMN_1223808 | ILMN_215755 | 1.99  | 0.0069 |
| <i>Dnali1</i>        | ILMN_2872896 | ILMN_253245 | 1.96  | 0.0035 |
| <i>Bcl2l1</i>        | ILMN_2742557 | ILMN_214423 | 1.96  | 0.0079 |
| <i>Adarb1</i>        | ILMN_3036678 | ILMN_247455 | 1.96  | 0.0076 |
| <i>Rnf167</i>        | ILMN_1214800 | ILMN_217477 | 1.93  | 0.0088 |
| <i>Sema6d</i>        | ILMN_1258953 | ILMN_217215 | 1.92  | 0.0089 |
| <i>Pknox2</i>        | ILMN_2663139 | ILMN_254436 | 1.92  | 0.0012 |
| <i>Saa3</i>          | ILMN_2772632 | ILMN_254030 | 1.92  | 0.0093 |
| <i>Megf11</i>        | ILMN_2618651 | ILMN_232739 | 1.88  | 0.0093 |
| <i>Chst3</i>         | ILMN_2864172 | ILMN_215951 | 1.85  | 0.0087 |
| <i>Ccdc18</i>        | ILMN_1257698 | ILMN_241253 | 1.79  | 0.0081 |
| <i>LOC100046264</i>  | ILMN_2727142 | ILMN_314590 | -1.82 | 0.0095 |
| <i>Htr4</i>          | ILMN_2743188 | ILMN_259080 | -1.83 | 0.0045 |
| <i>Atxn3</i>         | ILMN_2813284 | ILMN_211348 | -1.83 | 0.0061 |
| <i>Slc7a15</i>       | ILMN_3163103 | ILMN_215929 | -1.84 | 0.0098 |
| <i>Cdca7</i>         | ILMN_1221568 | ILMN_216604 | -1.86 | 0.0064 |
| <i>Prkca</i>         | ILMN_1217890 | ILMN_223295 | -1.87 | 0.0092 |
| <i>Sept6</i>         | ILMN_2992517 | ILMN_212389 | -1.89 | 0.0048 |
| <i>Klhl31</i>        | ILMN_3161736 | ILMN_216835 | -1.91 | 0.0029 |
| <i>Upf3b</i>         | ILMN_2494625 | ILMN_193163 | -1.94 | 0.0048 |
| <i>Rab11b</i>        | ILMN_2678592 | ILMN_220447 | -1.94 | 0.0037 |
| <i>2210038L17Rik</i> | ILMN_2809656 | ILMN_258785 | -1.96 | 0.0040 |
| <i>Pbx1</i>          | ILMN_1256907 | ILMN_246200 | -1.96 | 0.0080 |
| <i>LOC100044927</i>  | ILMN_2512023 | ILMN_316485 | -2.00 | 0.0067 |
| <i>LOC100048589</i>  | ILMN_1227874 | ILMN_310316 | -2.01 | 0.0039 |
| <i>Olfr25</i>        | ILMN_1239971 | ILMN_244357 | -2.02 | 0.0041 |
| <i>Chtf18</i>        | ILMN_1232175 | ILMN_222121 | -2.03 | 0.0093 |
| <i>E2f6</i>          | ILMN_2723931 | ILMN_220573 | -2.03 | 0.0068 |
| <i>Nxph2</i>         | ILMN_1251624 | ILMN_216723 | -2.03 | 0.0076 |
| <i>Ilk</i>           | ILMN_2662428 | ILMN_215687 | -2.04 | 0.0048 |
| <i>5630401D24Rik</i> | ILMN_2740461 | ILMN_221329 | -2.06 | 0.0017 |
| <i>Cyp11b2</i>       | ILMN_2748181 | ILMN_222335 | -2.06 | 0.0080 |
| <i>Wscd1</i>         | ILMN_2610442 | ILMN_210909 | -2.06 | 0.0073 |

|                      |              |             |       |        |
|----------------------|--------------|-------------|-------|--------|
| <i>Tub</i>           | ILMN_1220143 | ILMN_190171 | -2.06 | 0.0088 |
| <i>Palm</i>          | ILMN_2815626 | ILMN_210997 | -2.06 | 0.0091 |
| <i>2010107G12Rik</i> | ILMN_2975295 | ILMN_245127 | -2.06 | 0.0063 |
| <i>Olfr575</i>       | ILMN_2791541 | ILMN_219706 | -2.08 | 0.0024 |
| <i>BC049730</i>      | ILMN_2907915 | ILMN_258440 | -2.09 | 0.0099 |
| <i>Pofut2</i>        | ILMN_2615547 | ILMN_245334 | -2.10 | 0.0091 |
| <i>Vps13c</i>        | ILMN_2479134 | ILMN_191445 | -2.11 | 0.0079 |
| <i>Efna5</i>         | ILMN_2662536 | ILMN_235749 | -2.11 | 0.0073 |
| <i>Kcnk2</i>         | ILMN_2651369 | ILMN_211329 | -2.12 | 0.0042 |
| <i>Dmpk</i>          | ILMN_1229944 | ILMN_252780 | -2.12 | 0.0042 |
| <i>Stat1</i>         | ILMN_2655721 | ILMN_254778 | -2.12 | 0.0048 |
| <i>Trem12</i>        | ILMN_2980379 | ILMN_254312 | -2.13 | 0.0056 |
| <i>4831426I19Rik</i> | ILMN_3156782 | ILMN_217788 | -2.14 | 0.0077 |
| <i>Avp</i>           | ILMN_2710928 | ILMN_219592 | -2.14 | 0.0016 |
| <i>Frag1</i>         | ILMN_2751492 | ILMN_214081 | -2.14 | 0.0032 |
| <i>Zkscan1</i>       | ILMN_2744259 | ILMN_248708 | -2.14 | 0.0048 |
| <i>Nuak1</i>         | ILMN_2928720 | ILMN_234029 | -2.15 | 0.0073 |
| <i>Ppt2</i>          | ILMN_2616827 | ILMN_211539 | -2.16 | 0.0028 |
| <i>Rerg</i>          | ILMN_1230648 | ILMN_212208 | -2.16 | 0.0066 |
| <i>Crem</i>          | ILMN_2747264 | ILMN_233527 | -2.17 | 0.0083 |
| <i>Tspan11</i>       | ILMN_2843163 | ILMN_216944 | -2.17 | 0.0041 |
| <i>Mme11</i>         | ILMN_1253943 | ILMN_218296 | -2.18 | 0.0049 |
| <i>Lrdd</i>          | ILMN_2992009 | ILMN_220270 | -2.18 | 0.0012 |
| <i>Hist3h2a</i>      | ILMN_2629289 | ILMN_241136 | -2.18 | 0.0056 |
| <i>Prox1</i>         | ILMN_2598766 | ILMN_209740 | -2.19 | 0.0034 |
| <i>Pex12</i>         | ILMN_1250747 | ILMN_212145 | -2.20 | 0.0008 |
| <i>Speer5-ps1</i>    | ILMN_2748533 | ILMN_222365 | -2.20 | 0.0026 |
| <i>Ube2l3</i>        | ILMN_2475727 | ILMN_251120 | -2.20 | 0.0067 |
| <i>Camkk1</i>        | ILMN_1242310 | ILMN_216860 | -2.21 | 0.0045 |
| <i>Ppil2</i>         | ILMN_2771686 | ILMN_256781 | -2.21 | 0.0009 |
| <i>Tob1</i>          | ILMN_1250011 | ILMN_191002 | -2.21 | 0.0045 |
| <i>Sall1</i>         | ILMN_2853800 | ILMN_214029 | -2.22 | 0.0054 |
| <i>Asph</i>          | ILMN_2610810 | ILMN_209310 | -2.22 | 0.0069 |
| <i>Tgfb1i1</i>       | ILMN_1227722 | ILMN_216486 | -2.22 | 0.0089 |
| <i>Gorasp2</i>       | ILMN_1238654 | ILMN_210814 | -2.23 | 0.0036 |
| <i>9630028B13Rik</i> | ILMN_2857095 | ILMN_216918 | -2.23 | 0.0024 |
| <i>Kif22</i>         | ILMN_2762326 | ILMN_223310 | -2.23 | 0.0073 |
| <i>Cml5</i>          | ILMN_2659237 | ILMN_215418 | -2.24 | 0.0017 |
| <i>Atp11c</i>        | ILMN_3152506 | ILMN_238244 | -2.24 | 0.0029 |
| <i>Lrsam1</i>        | ILMN_2761459 | ILMN_212097 | -2.24 | 0.0038 |
| <i>Il15</i>          | ILMN_1219869 | ILMN_225654 | -2.24 | 0.0072 |
| <i>Lrch4</i>         | ILMN_2597210 | ILMN_209585 | -2.25 | 0.0011 |
| <i>D19Ertd737e</i>   | ILMN_1249292 | ILMN_214140 | -2.25 | 0.0026 |
| <i>4930453N24Rik</i> | ILMN_2888766 | ILMN_248901 | -2.25 | 0.0089 |
| <i>5830405N20Rik</i> | ILMN_2690214 | ILMN_217992 | -2.26 | 0.0027 |
| <i>Hsf4</i>          | ILMN_2746797 | ILMN_222242 | -2.26 | 0.0068 |
| <i>Klra2</i>         | ILMN_1251941 | ILMN_222820 | -2.26 | 0.0049 |
| <i>Dct</i>           | ILMN_1251894 | ILMN_219109 | -2.27 | 0.0054 |
| <i>Nkx2-3</i>        | ILMN_2697760 | ILMN_218592 | -2.27 | 0.0069 |
| <i>Cpox</i>          | ILMN_2739182 | ILMN_215021 | -2.27 | 0.0015 |

|                     |              |             |       |        |
|---------------------|--------------|-------------|-------|--------|
| <i>Clec5a</i>       | ILMN_3045984 | ILMN_259534 | -2.27 | 0.0048 |
| <i>Rnf139</i>       | ILMN_2604560 | ILMN_210338 | -2.27 | 0.0009 |
| <i>Phex</i>         | ILMN_1243830 | ILMN_217699 | -2.28 | 0.0066 |
| <i>LOC100046080</i> | ILMN_1217480 | ILMN_309891 | -2.28 | 0.0011 |
| <i>Rilp</i>         | ILMN_1218228 | ILMN_226905 | -2.28 | 0.0081 |
| <i>LOC381852</i>    | ILMN_2830750 | ILMN_252182 | -2.28 | 0.0031 |
| <i>Kcnj6</i>        | ILMN_3038066 | ILMN_240501 | -2.29 | 0.0013 |
| <i>Gstt3</i>        | ILMN_2665715 | ILMN_215961 | -2.29 | 0.0044 |
| <i>Efcab4b</i>      | ILMN_1240788 | ILMN_231789 | -2.29 | 0.0010 |
| <i>Gad1</i>         | ILMN_2621743 | ILMN_212011 | -2.30 | 0.0002 |
| <i>Ppan</i>         | ILMN_2778530 | ILMN_249668 | -2.30 | 0.0015 |
| <i>Acsl3</i>        | ILMN_3061300 | ILMN_250023 | -2.30 | 0.0061 |
| <i>Mafk</i>         | ILMN_2683831 | ILMN_217490 | -2.30 | 0.0053 |
| <i>Chchd2</i>       | ILMN_2833786 | ILMN_221127 | -2.30 | 0.0010 |
| <i>Yif1a</i>        | ILMN_2959787 | ILMN_185962 | -2.31 | 0.0009 |
| <i>Tnfaip1</i>      | ILMN_2429800 | ILMN_185763 | -2.31 | 0.0033 |
| <i>Arfgap1</i>      | ILMN_2908547 | ILMN_211960 | -2.32 | 0.0022 |
| <i>Sms</i>          | ILMN_1232323 | ILMN_184683 | -2.32 | 0.0003 |
| <i>Lmnb1</i>        | ILMN_2720229 | ILMN_220293 | -2.33 | 0.0026 |
| <i>Rasef</i>        | ILMN_2950343 | ILMN_235059 | -2.34 | 0.0009 |
| <i>Olfr873</i>      | ILMN_3160657 | ILMN_238978 | -2.34 | 0.0072 |
| <i>Tacr1</i>        | ILMN_2726850 | ILMN_208724 | -2.34 | 0.0024 |
| <i>Cenpk</i>        | ILMN_2668436 | ILMN_216205 | -2.35 | 0.0046 |
| <i>P2ry10</i>       | ILMN_2954781 | ILMN_213782 | -2.35 | 0.0014 |
| <i>Svil</i>         | ILMN_1224247 | ILMN_215439 | -2.35 | 0.0018 |
| <i>Psg16</i>        | ILMN_2611851 | ILMN_249548 | -2.35 | 0.0028 |
| <i>Kcnj6</i>        | ILMN_3162725 | ILMN_252608 | -2.35 | 0.0003 |
| <i>Galnt10</i>      | ILMN_2878781 | ILMN_212503 | -2.36 | 0.0053 |
| <i>Gnal</i>         | ILMN_3036452 | ILMN_254487 | -2.36 | 0.0059 |
| <i>Sae1</i>         | ILMN_2513895 | ILMN_185054 | -2.36 | 0.0009 |
| <i>Shroom3</i>      | ILMN_3162511 | ILMN_240281 | -2.36 | 0.0021 |
| <i>Myo7b</i>        | ILMN_2626106 | ILMN_212410 | -2.36 | 0.0006 |
| <i>Hist3h2ba</i>    | ILMN_2652022 | ILMN_214796 | -2.37 | 0.0008 |
| <i>Derl1</i>        | ILMN_2896416 | ILMN_212566 | -2.37 | 0.0028 |
| <i>Pdcd1</i>        | ILMN_1260060 | ILMN_213210 | -2.37 | 0.0021 |
| <i>MGC117608</i>    | ILMN_2999032 | ILMN_234681 | -2.37 | 0.0018 |
| <i>Ank3</i>         | ILMN_2622307 | ILMN_212062 | -2.38 | 0.0030 |
| <i>Olfr1040</i>     | ILMN_1237824 | ILMN_214655 | -2.38 | 0.0046 |
| <i>Plb1</i>         | ILMN_3036004 | ILMN_258284 | -2.38 | 0.0037 |
| <i>Cer1</i>         | ILMN_2884751 | ILMN_259043 | -2.38 | 0.0065 |
| <i>Nfe2l3</i>       | ILMN_2787209 | ILMN_223567 | -2.39 | 0.0041 |
| <i>Nphp4</i>        | ILMN_2641152 | ILMN_213822 | -2.40 | 0.0029 |
| <i>Otop2</i>        | ILMN_2700317 | ILMN_218795 | -2.41 | 0.0019 |
| <i>Cmklr1</i>       | ILMN_2774056 | ILMN_233212 | -2.41 | 0.0028 |
| <i>Trpv6</i>        | ILMN_3001186 | ILMN_195673 | -2.41 | 0.0029 |
| <i>Clk2</i>         | ILMN_2885016 | ILMN_208789 | -2.41 | 0.0030 |
| <i>Tlr3</i>         | ILMN_2697002 | ILMN_218534 | -2.42 | 0.0030 |
| <i>Hs3st6</i>       | ILMN_3160653 | ILMN_233041 | -2.42 | 0.0012 |
| <i>Ifna6</i>        | ILMN_1242716 | ILMN_196765 | -2.43 | 0.0074 |
| <i>Rnf8</i>         | ILMN_1214110 | ILMN_213016 | -2.43 | 0.0004 |

|                      |              |             |       |        |
|----------------------|--------------|-------------|-------|--------|
| <i>Mgst3</i>         | ILMN_1238479 | ILMN_210134 | -2.43 | 0.0077 |
| <i>Ifne1</i>         | ILMN_1255754 | ILMN_223661 | -2.43 | 0.0033 |
| <i>E130309D02Rik</i> | ILMN_1251585 | ILMN_219074 | -2.43 | 0.0008 |
| <i>Nbn</i>           | ILMN_1240392 | ILMN_215143 | -2.44 | 0.0012 |
| <i>Ifngr2</i>        | ILMN_1258300 | ILMN_209117 | -2.44 | 0.0072 |
| <i>Armcx6</i>        | ILMN_3012253 | ILMN_249108 | -2.45 | 0.0006 |
| <i>Ifrg15</i>        | ILMN_2767764 | ILMN_223695 | -2.45 | 0.0034 |
| <i>Il1r1</i>         | ILMN_1231125 | ILMN_217023 | -2.46 | 0.0066 |
| <i>AB112350</i>      | ILMN_2902492 | ILMN_211687 | -2.47 | 0.0064 |
| <i>Srp9</i>          | ILMN_1260348 | ILMN_213903 | -2.47 | 0.0099 |
| <i>Muc5ac</i>        | ILMN_2884000 | ILMN_231564 | -2.47 | 0.0075 |
| <i>Stag3</i>         | ILMN_2993843 | ILMN_212542 | -2.48 | 0.0087 |
| <i>Ninj2</i>         | ILMN_2626283 | ILMN_212424 | -2.48 | 0.0007 |
| <i>Fhl4</i>          | ILMN_2793982 | ILMN_217150 | -2.49 | 0.0028 |
| <i>Ripk3</i>         | ILMN_2750356 | ILMN_222495 | -2.49 | 0.0013 |
| <i>Pik3c2a</i>       | ILMN_1252098 | ILMN_220040 | -2.49 | 0.0087 |
| <i>Rabgga</i>        | ILMN_1245469 | ILMN_216278 | -2.49 | 0.0007 |
| <i>EG244595</i>      | ILMN_2784942 | ILMN_228041 | -2.50 | 0.0080 |
| <i>Pomt1</i>         | ILMN_2662545 | ILMN_215697 | -2.50 | 0.0030 |
| <i>Spdef</i>         | ILMN_1258162 | ILMN_222088 | -2.50 | 0.0073 |
| <i>Dbn1</i>          | ILMN_1227672 | ILMN_214620 | -2.50 | 0.0008 |
| <i>4930526D03Rik</i> | ILMN_2858266 | ILMN_239831 | -2.50 | 0.0024 |
| <i>Khdrbs1</i>       | ILMN_1256052 | ILMN_220721 | -2.50 | 0.0051 |
| <i>Ccng1</i>         | ILMN_2500276 | ILMN_232357 | -2.50 | 0.0096 |
| <i>2010002N04Rik</i> | ILMN_2706014 | ILMN_219235 | -2.51 | 0.0054 |
| <i>Ntn4</i>          | ILMN_2959863 | ILMN_250922 | -2.51 | 0.0047 |
| <i>Bcap29</i>        | ILMN_2866752 | ILMN_214217 | -2.51 | 0.0037 |
| <i>Lsm3</i>          | ILMN_2837865 | ILMN_223070 | -2.51 | 0.0040 |
| <i>LOC100040799</i>  | ILMN_3162394 | ILMN_314797 | -2.51 | 0.0004 |
| <i>Nasp</i>          | ILMN_1251930 | ILMN_211691 | -2.52 | 0.0098 |
| <i>Coro2b</i>        | ILMN_1216552 | ILMN_209081 | -2.52 | 0.0019 |
| <i>Rgp1</i>          | ILMN_2710589 | ILMN_244100 | -2.52 | 0.0071 |
| <i>BC005537</i>      | ILMN_1227295 | ILMN_209456 | -2.52 | 0.0098 |
| <i>Apo17b</i>        | ILMN_2887215 | ILMN_258754 | -2.52 | 0.0027 |
| <i>Twistnb</i>       | ILMN_1231779 | ILMN_189979 | -2.52 | 0.0001 |
| <i>Fbxw11</i>        | ILMN_2708319 | ILMN_219399 | -2.52 | 0.0098 |
| <i>Mybpc3</i>        | ILMN_2689136 | ILMN_217905 | -2.52 | 0.0081 |
| <i>Defb5</i>         | ILMN_1232541 | ILMN_222434 | -2.52 | 0.0012 |
| <i>Gpr109a</i>       | ILMN_2847115 | ILMN_221500 | -2.53 | 0.0041 |
| <i>Trip12</i>        | ILMN_2510364 | ILMN_187207 | -2.53 | 0.0070 |
| <i>Slc4a1ap</i>      | ILMN_2969435 | ILMN_214013 | -2.53 | 0.0087 |
| <i>LOC554292</i>     | ILMN_2941575 | ILMN_238123 | -2.53 | 0.0010 |
| <i>Pira11</i>        | ILMN_3073899 | ILMN_252909 | -2.53 | 0.0033 |
| <i>Anpep</i>         | ILMN_2589651 | ILMN_208800 | -2.54 | 0.0081 |
| <i>Tgm3</i>          | ILMN_2777363 | ILMN_252846 | -2.54 | 0.0036 |
| <i>Acbd4</i>         | ILMN_3150296 | ILMN_217938 | -2.54 | 0.0040 |
| <i>Col18a1</i>       | ILMN_2937542 | ILMN_221410 | -2.55 | 0.0014 |
| <i>Matn4</i>         | ILMN_2729289 | ILMN_212683 | -2.55 | 0.0042 |
| <i>Mobkl2c</i>       | ILMN_2661168 | ILMN_215572 | -2.56 | 0.0010 |
| <i>Olfr351</i>       | ILMN_2665824 | ILMN_215969 | -2.57 | 0.0029 |

|                      |              |             |       |        |
|----------------------|--------------|-------------|-------|--------|
| <i>3110050N22Rik</i> | ILMN_1221011 | ILMN_221927 | -2.57 | 0.0032 |
| <i>Stat1</i>         | ILMN_2593196 | ILMN_254778 | -2.57 | 0.0054 |
| <i>Creb3l4</i>       | ILMN_1213549 | ILMN_223420 | -2.58 | 0.0037 |
| <i>Zfp192</i>        | ILMN_2463828 | ILMN_189725 | -2.58 | 0.0033 |
| <i>1810007E14Rik</i> | ILMN_2671528 | ILMN_216478 | -2.58 | 0.0074 |
| <i>Gm597</i>         | ILMN_2973504 | ILMN_252624 | -2.58 | 0.0001 |
| <i>Glt25d2</i>       | ILMN_2889899 | ILMN_223309 | -2.58 | 0.0015 |
| <i>Phf6</i>          | ILMN_1237295 | ILMN_211977 | -2.58 | 0.0006 |
| <i>Adam2</i>         | ILMN_2739679 | ILMN_221736 | -2.58 | 0.0002 |
| <i>Ube2e1</i>        | ILMN_1231810 | ILMN_191348 | -2.59 | 0.0030 |
| <i>B2m</i>           | ILMN_2739999 | ILMN_209318 | -2.59 | 0.0046 |
| <i>H2-Q5</i>         | ILMN_2685581 | ILMN_196752 | -2.59 | 0.0033 |
| <i>Relt</i>          | ILMN_2422834 | ILMN_184937 | -2.59 | 0.0017 |
| <i>Cdyl2</i>         | ILMN_2728967 | ILMN_220944 | -2.59 | 0.0012 |
| <i>Sertad4</i>       | ILMN_1229745 | ILMN_220872 | -2.60 | 0.0020 |
| <i>E030010A14Rik</i> | ILMN_2599686 | ILMN_209836 | -2.60 | 0.0015 |
| <i>Tmem49</i>        | ILMN_2861787 | ILMN_209017 | -2.60 | 0.0017 |
| <i>AgRP</i>          | ILMN_2703427 | ILMN_245093 | -2.61 | 0.0001 |
| <i>Armc6</i>         | ILMN_2873469 | ILMN_230074 | -2.61 | 0.0053 |
| <i>Pcdh10</i>        | ILMN_2663752 | ILMN_215801 | -2.61 | 0.0037 |
| <i>Dmkn</i>          | ILMN_3032088 | ILMN_219849 | -2.61 | 0.0005 |
| <i>Frs2</i>          | ILMN_2993711 | ILMN_260176 | -2.61 | 0.0019 |
| <i>Zfp42</i>         | ILMN_2961604 | ILMN_189202 | -2.62 | 0.0043 |
| <i>Etf1</i>          | ILMN_2995755 | ILMN_222612 | -2.62 | 0.0084 |
| <i>Cyp3a13</i>       | ILMN_2639214 | ILMN_213639 | -2.62 | 0.0034 |
| <i>Capn3</i>         | ILMN_2867771 | ILMN_218422 | -2.63 | 0.0086 |
| <i>Cul4b</i>         | ILMN_2656909 | ILMN_215220 | -2.63 | 0.0089 |
| <i>Fdxr</i>          | ILMN_1214585 | ILMN_216640 | -2.63 | 0.0026 |
| <i>Panx3</i>         | ILMN_2721052 | ILMN_220361 | -2.63 | 0.0009 |
| <i>Bbc3</i>          | ILMN_2690621 | ILMN_212340 | -2.63 | 0.0002 |
| <i>Col1a1</i>        | ILMN_2687872 | ILMN_217812 | -2.63 | 0.0044 |
| <i>Etv4</i>          | ILMN_2778111 | ILMN_260771 | -2.63 | 0.0009 |
| <i>2610021K21Rik</i> | ILMN_2660136 | ILMN_228893 | -2.63 | 0.0025 |
| <i>2210010L05Rik</i> | ILMN_2612238 | ILMN_242384 | -2.64 | 0.0023 |
| <i>Rab17</i>         | ILMN_2752490 | ILMN_215232 | -2.64 | 0.0061 |
| <i>Thyn1</i>         | ILMN_2987062 | ILMN_211080 | -2.64 | 0.0006 |
| <i>Hist1h3c</i>      | ILMN_1229755 | ILMN_220453 | -2.64 | 0.0042 |
| <i>Mak10</i>         | ILMN_2828599 | ILMN_211089 | -2.65 | 0.0080 |
| <i>Oas1g</i>         | ILMN_1253808 | ILMN_212179 | -2.65 | 0.0031 |
| <i>Mapk8</i>         | ILMN_2456617 | ILMN_188893 | -2.65 | 0.0029 |
| <i>St3gal3</i>       | ILMN_2879848 | ILMN_211800 | -2.65 | 0.0066 |
| <i>Vmo1</i>          | ILMN_2936105 | ILMN_253414 | -2.65 | 0.0065 |
| <i>Lca5</i>          | ILMN_3024416 | ILMN_228057 | -2.65 | 0.0053 |
| <i>Gabra3</i>        | ILMN_2595601 | ILMN_209420 | -2.65 | 0.0002 |
| <i>6430548M08Rik</i> | ILMN_2599214 | ILMN_188148 | -2.66 | 0.0085 |
| <i>4933421E11Rik</i> | ILMN_1221212 | ILMN_233237 | -2.66 | 0.0034 |
| <i>Samd14</i>        | ILMN_1235581 | ILMN_251191 | -2.66 | 0.0029 |
| <i>Rbm4b</i>         | ILMN_1220793 | ILMN_233191 | -2.66 | 0.0050 |
| <i>9330155M09Rik</i> | ILMN_2765053 | ILMN_223520 | -2.67 | 0.0004 |
| <i>Cr2</i>           | ILMN_2696049 | ILMN_208998 | -2.67 | 0.0028 |

|                       |              |             |       |        |
|-----------------------|--------------|-------------|-------|--------|
| <i>Ruvbl1</i>         | ILMN_1228999 | ILMN_216028 | -2.67 | 0.0000 |
| <i>Bai1</i>           | ILMN_2680188 | ILMN_217198 | -2.68 | 0.0075 |
| <i>BC024814</i>       | ILMN_2592909 | ILMN_209139 | -2.68 | 0.0056 |
| <i>Lyar</i>           | ILMN_2651126 | ILMN_214718 | -2.68 | 0.0029 |
| <i>ORF63</i>          | ILMN_1260025 | ILMN_222699 | -2.68 | 0.0001 |
| <i>9530002B09Rik</i>  | ILMN_1230372 | ILMN_217820 | -2.68 | 0.0046 |
| <i>Tcl1</i>           | ILMN_2985612 | ILMN_213546 | -2.68 | 0.0029 |
| <i>Ppap2b</i>         | ILMN_1247753 | ILMN_212849 | -2.68 | 0.0025 |
| <i>LOC100045268</i>   | ILMN_1248969 | ILMN_310712 | -2.69 | 0.0017 |
| <i>Gtpbp1</i>         | ILMN_2510196 | ILMN_194850 | -2.69 | 0.0019 |
| <i>Upf1</i>           | ILMN_2740755 | ILMN_239726 | -2.69 | 0.0026 |
| <i>Arg2</i>           | ILMN_2669164 | ILMN_216267 | -2.69 | 0.0060 |
| <i>scl33870.2_144</i> | ILMN_2459676 | ILMN_188833 | -2.70 | 0.0025 |
| <i>EG368203</i>       | ILMN_2669886 | ILMN_216335 | -2.70 | 0.0030 |
| <i>ler2</i>           | ILMN_2642705 | ILMN_213956 | -2.70 | 0.0049 |
| <i>Ptges</i>          | ILMN_2786442 | ILMN_211451 | -2.70 | 0.0051 |
| <i>D4Ertd22e</i>      | ILMN_3129206 | ILMN_241928 | -2.71 | 0.0030 |
| <i>Adamts20</i>       | ILMN_2598519 | ILMN_209718 | -2.71 | 0.0006 |
| <i>Gpr124</i>         | ILMN_1214180 | ILMN_260422 | -2.71 | 0.0003 |
| <i>Srrm2</i>          | ILMN_3028894 | ILMN_217084 | -2.72 | 0.0011 |
| <i>H2-DMA</i>         | ILMN_2866856 | ILMN_224639 | -2.72 | 0.0098 |
| <i>Rest</i>           | ILMN_2615160 | ILMN_211371 | -2.72 | 0.0012 |
| <i>Olfr1097</i>       | ILMN_2791018 | ILMN_216528 | -2.72 | 0.0028 |
| <i>Snf1lk</i>         | ILMN_1239463 | ILMN_210221 | -2.72 | 0.0003 |
| <i>Olfr433</i>        | ILMN_2862009 | ILMN_225742 | -2.72 | 0.0001 |
| <i>Trim6</i>          | ILMN_2940417 | ILMN_227487 | -2.72 | 0.0016 |
| <i>Col2a1</i>         | ILMN_2759142 | ILMN_237764 | -2.72 | 0.0004 |
| <i>Gpr133</i>         | ILMN_3123855 | ILMN_244372 | -2.73 | 0.0002 |
| <i>Dhx57</i>          | ILMN_2617925 | ILMN_210546 | -2.73 | 0.0014 |
| <i>Ga17</i>           | ILMN_1244685 | ILMN_187273 | -2.73 | 0.0042 |
| <i>Slc4a3</i>         | ILMN_2593621 | ILMN_209211 | -2.73 | 0.0038 |
| <i>Tap2</i>           | ILMN_2686721 | ILMN_217715 | -2.74 | 0.0019 |
| <i>Hoxd12</i>         | ILMN_2951852 | ILMN_221822 | -2.74 | 0.0010 |
| <i>Tbpl1</i>          | ILMN_2605872 | ILMN_210463 | -2.74 | 0.0028 |
| <i>Gabrb3</i>         | ILMN_3120335 | ILMN_240761 | -2.74 | 0.0031 |
| <i>V1rd17</i>         | ILMN_2417982 | ILMN_184357 | -2.74 | 0.0002 |
| <i>B230396O12Rik</i>  | ILMN_2806479 | ILMN_245278 | -2.74 | 0.0051 |
| <i>Clic4</i>          | ILMN_2761109 | ILMN_259580 | -2.74 | 0.0041 |
| <i>Ankrd1</i>         | ILMN_2625451 | ILMN_212352 | -2.75 | 0.0000 |
| <i>Mas1</i>           | ILMN_1253860 | ILMN_215167 | -2.77 | 0.0030 |
| <i>Dazl</i>           | ILMN_2634147 | ILMN_213146 | -2.77 | 0.0044 |
| <i>4933417A18Rik</i>  | ILMN_2873321 | ILMN_223588 | -2.77 | 0.0002 |
| <i>Alox12</i>         | ILMN_2827535 | ILMN_211240 | -2.78 | 0.0028 |
| <i>Plekha4</i>        | ILMN_1243826 | ILMN_216745 | -2.78 | 0.0028 |
| <i>Slc7a4</i>         | ILMN_2639360 | ILMN_229227 | -2.78 | 0.0036 |
| <i>2610200G18Rik</i>  | ILMN_2605041 | ILMN_210379 | -2.78 | 0.0002 |
| <i>Rab6ip1</i>        | ILMN_3033866 | ILMN_213254 | -2.78 | 0.0053 |
| <i>Pax3</i>           | ILMN_2634195 | ILMN_213151 | -2.79 | 0.0040 |
| <i>1700039E15Rik</i>  | ILMN_2958222 | ILMN_259506 | -2.79 | 0.0036 |
| <i>Klra15</i>         | ILMN_1233185 | ILMN_196755 | -2.79 | 0.0006 |

|                           |              |             |       |        |
|---------------------------|--------------|-------------|-------|--------|
| <i>Fxyd5</i>              | ILMN_1235493 | ILMN_221977 | -2.79 | 0.0056 |
| <i>Ppap2b</i>             | ILMN_2630993 | ILMN_212849 | -2.79 | 0.0033 |
| <i>ENSMUSG00000068790</i> | ILMN_3070389 | ILMN_234056 | -2.80 | 0.0046 |
| <i>LOC382106</i>          | ILMN_3131601 | ILMN_246426 | -2.80 | 0.0027 |
| <i>G6pc3</i>              | ILMN_1218602 | ILMN_208870 | -2.80 | 0.0007 |
| <i>1110004E09Rik</i>      | ILMN_1257567 | ILMN_212399 | -2.80 | 0.0059 |
| <i>Sts</i>                | ILMN_2650049 | ILMN_214626 | -2.81 | 0.0008 |
| <i>Rexo1</i>              | ILMN_2592554 | ILMN_241596 | -2.81 | 0.0009 |
| <i>2900024C23Rik</i>      | ILMN_2842802 | ILMN_216218 | -2.81 | 0.0011 |
| <i>Spsb4</i>              | ILMN_1243507 | ILMN_212461 | -2.81 | 0.0029 |
| <i>Dbi</i>                | ILMN_1215469 | ILMN_223553 | -2.81 | 0.0001 |
| <i>4921528G01Rik</i>      | ILMN_1247585 | ILMN_192792 | -2.81 | 0.0003 |
| <i>Lox</i>                | ILMN_2997494 | ILMN_219336 | -2.82 | 0.0060 |
| <i>Slc16a8</i>            | ILMN_2926057 | ILMN_209899 | -2.82 | 0.0001 |
| <i>2610208M17Rik</i>      | ILMN_3104094 | ILMN_207453 | -2.82 | 0.0064 |
| <i>Ank2</i>               | ILMN_2718030 | ILMN_236030 | -2.82 | 0.0043 |
| <i>A030010B05Rik</i>      | ILMN_1252682 | ILMN_185939 | -2.83 | 0.0002 |
| <i>Olfr1357</i>           | ILMN_2784096 | ILMN_251498 | -2.83 | 0.0012 |
| <i>4930563P21Rik</i>      | ILMN_1255963 | ILMN_240965 | -2.83 | 0.0002 |
| <i>Trpd52l3</i>           | ILMN_2989947 | ILMN_233680 | -2.83 | 0.0010 |
| <i>Mbd4</i>               | ILMN_1213981 | ILMN_219494 | -2.83 | 0.0009 |
| <i>Rbx1</i>               | ILMN_1230583 | ILMN_210570 | -2.84 | 0.0076 |
| <i>Map2k5</i>             | ILMN_2639375 | ILMN_213658 | -2.84 | 0.0037 |
| <i>Zswim4</i>             | ILMN_2457408 | ILMN_188989 | -2.84 | 0.0006 |
| <i>A830018L16Rik</i>      | ILMN_2616075 | ILMN_211454 | -2.84 | 0.0015 |
| <i>Klk1b1</i>             | ILMN_1256119 | ILMN_196746 | -2.84 | 0.0014 |
| <i>Clec4a3</i>            | ILMN_3161652 | ILMN_210538 | -2.85 | 0.0081 |
| <i>Ucn</i>                | ILMN_2834808 | ILMN_196227 | -2.85 | 0.0098 |
| <i>Dmrta1</i>             | ILMN_2712159 | ILMN_219683 | -2.85 | 0.0001 |
| <i>Dnm1l</i>              | ILMN_3111421 | ILMN_256682 | -2.85 | 0.0042 |
| <i>Senp5</i>              | ILMN_2978857 | ILMN_212645 | -2.85 | 0.0000 |
| <i>Prr15</i>              | ILMN_2649456 | ILMN_214576 | -2.85 | 0.0018 |
| <i>Epha7</i>              | ILMN_2826671 | ILMN_210861 | -2.86 | 0.0008 |
| <i>Olfr883</i>            | ILMN_2688153 | ILMN_217834 | -2.86 | 0.0002 |
| <i>Rtp1</i>               | ILMN_2855737 | ILMN_230544 | -2.86 | 0.0042 |
| <i>Nme4</i>               | ILMN_1244161 | ILMN_210085 | -2.86 | 0.0039 |
| <i>Nlk</i>                | ILMN_2683613 | ILMN_217474 | -2.86 | 0.0002 |
| <i>Calca</i>              | ILMN_3028637 | ILMN_246924 | -2.87 | 0.0021 |
| <i>Cc2d1a</i>             | ILMN_2645613 | ILMN_214216 | -2.87 | 0.0053 |
| <i>Slc15a1</i>            | ILMN_2943040 | ILMN_222458 | -2.88 | 0.0056 |
| <i>I7Rn6</i>              | ILMN_3162224 | ILMN_210943 | -2.88 | 0.0038 |
| <i>Auts2</i>              | ILMN_3052726 | ILMN_211916 | -2.88 | 0.0034 |
| <i>Cilp2</i>              | ILMN_2963720 | ILMN_244613 | -2.88 | 0.0002 |
| <i>Aatk</i>               | ILMN_1231439 | ILMN_221321 | -2.88 | 0.0024 |
| <i>Zfp157</i>             | ILMN_1235580 | ILMN_237439 | -2.88 | 0.0009 |
| <i>2310057J18Rik</i>      | ILMN_1220128 | ILMN_210967 | -2.88 | 0.0010 |
| <i>Zfp36l3</i>            | ILMN_1250130 | ILMN_259745 | -2.88 | 0.0000 |
| <i>Sypl</i>               | ILMN_2758720 | ILMN_227266 | -2.89 | 0.0039 |
| <i>Exdl2</i>              | ILMN_2927225 | ILMN_208913 | -2.89 | 0.0011 |
| <i>Nf2</i>                | ILMN_2611840 | ILMN_252759 | -2.89 | 0.0000 |

|                      |              |             |       |        |
|----------------------|--------------|-------------|-------|--------|
| <i>Zfat</i>          | ILMN_2985411 | ILMN_201573 | -2.89 | 0.0000 |
| <i>Srd5a1</i>        | ILMN_2692927 | ILMN_218206 | -2.89 | 0.0036 |
| <i>Cdkl2</i>         | ILMN_2657790 | ILMN_215298 | -2.90 | 0.0009 |
| <i>Man1a</i>         | ILMN_2715319 | ILMN_219928 | -2.90 | 0.0021 |
| <i>Rhox4d</i>        | ILMN_2846026 | ILMN_243531 | -2.90 | 0.0093 |
| <i>Ccdc96</i>        | ILMN_2886872 | ILMN_222153 | -2.91 | 0.0000 |
| <i>EG232599</i>      | ILMN_2605183 | ILMN_210393 | -2.91 | 0.0013 |
| <i>Mpl</i>           | ILMN_1226499 | ILMN_213487 | -2.92 | 0.0002 |
| <i>Slc16a7</i>       | ILMN_2645399 | ILMN_214197 | -2.92 | 0.0008 |
| <i>Gpr81</i>         | ILMN_2699134 | ILMN_218703 | -2.93 | 0.0011 |
| <i>Mbp</i>           | ILMN_3081854 | ILMN_250782 | -2.93 | 0.0037 |
| <i>E130303B06Rik</i> | ILMN_2706129 | ILMN_219244 | -2.93 | 0.0005 |
| <i>Elf2</i>          | ILMN_2748336 | ILMN_212428 | -2.93 | 0.0010 |
| <i>Gm50</i>          | ILMN_3131846 | ILMN_257862 | -2.93 | 0.0057 |
| <i>Gbp3</i>          | ILMN_1244513 | ILMN_216816 | -2.93 | 0.0079 |
| <i>Eml5</i>          | ILMN_3114898 | ILMN_259591 | -2.94 | 0.0086 |
| <i>Bglap1</i>        | ILMN_2610166 | ILMN_247195 | -2.95 | 0.0006 |
| <i>Ctdp1</i>         | ILMN_2613659 | ILMN_211213 | -2.95 | 0.0001 |
| <i>Mybbp1a</i>       | ILMN_1216204 | ILMN_228300 | -2.96 | 0.0002 |
| <i>Serpinb3a</i>     | ILMN_2687408 | ILMN_238870 | -2.96 | 0.0037 |
| <i>Ebpl</i>          | ILMN_2725035 | ILMN_211415 | -2.96 | 0.0035 |
| <i>Pdzk1ip1</i>      | ILMN_2618935 | ILMN_211728 | -2.97 | 0.0048 |
| <i>4632404H12Rik</i> | ILMN_2629897 | ILMN_209340 | -2.97 | 0.0015 |
| <i>Rreb1</i>         | ILMN_3122124 | ILMN_249028 | -2.97 | 0.0003 |
| <i>Cd248</i>         | ILMN_2896843 | ILMN_216345 | -2.97 | 0.0006 |
| <i>Slc43a3</i>       | ILMN_2687437 | ILMN_214763 | -2.97 | 0.0023 |
| <i>Grin2c</i>        | ILMN_2757484 | ILMN_222972 | -2.98 | 0.0056 |
| <i>Shf</i>           | ILMN_3163419 | ILMN_245068 | -3.00 | 0.0000 |
| <i>Col24a1</i>       | ILMN_2857666 | ILMN_261313 | -3.00 | 0.0005 |
| <i>Invs</i>          | ILMN_2664073 | ILMN_212167 | -3.00 | 0.0002 |
| <i>Csf2rb2</i>       | ILMN_2750047 | ILMN_222474 | -3.01 | 0.0003 |
| <i>Gpr137b</i>       | ILMN_3042112 | ILMN_227353 | -3.01 | 0.0002 |
| <i>Slc6a2</i>        | ILMN_2669736 | ILMN_216320 | -3.01 | 0.0021 |
| <i>Ctrl</i>          | ILMN_2673260 | ILMN_216616 | -3.01 | 0.0003 |
| <i>Ddah1</i>         | ILMN_1256676 | ILMN_195643 | -3.01 | 0.0009 |
| <i>Gpmb</i>          | ILMN_1236420 | ILMN_211323 | -3.01 | 0.0000 |
| <i>Olf727</i>        | ILMN_2741180 | ILMN_221847 | -3.02 | 0.0080 |
| <i>Chrna2</i>        | ILMN_2681916 | ILMN_217328 | -3.02 | 0.0005 |
| <i>Rnf138</i>        | ILMN_1220310 | ILMN_217489 | -3.02 | 0.0002 |
| <i>Slc1a2</i>        | ILMN_3047516 | ILMN_225538 | -3.02 | 0.0008 |
| <i>Gcnt2</i>         | ILMN_1227951 | ILMN_210789 | -3.02 | 0.0005 |
| <i>Prom2</i>         | ILMN_1246392 | ILMN_214759 | -3.02 | 0.0059 |
| <i>Psme4</i>         | ILMN_2947187 | ILMN_217690 | -3.03 | 0.0003 |
| <i>Atg3</i>          | ILMN_2595188 | ILMN_209368 | -3.03 | 0.0008 |
| <i>Olf7536</i>       | ILMN_1231381 | ILMN_209923 | -3.03 | 0.0097 |
| <i>Bag1</i>          | ILMN_2712018 | ILMN_219670 | -3.03 | 0.0000 |
| <i>Ldlrad3</i>       | ILMN_1217129 | ILMN_213656 | -3.03 | 0.0012 |
| <i>Zfp386</i>        | ILMN_3067404 | ILMN_242298 | -3.04 | 0.0001 |
| <i>Slain1</i>        | ILMN_2751572 | ILMN_222565 | -3.04 | 0.0036 |
| <i>Abcd1</i>         | ILMN_1245447 | ILMN_209991 | -3.04 | 0.0004 |



|                      |              |             |       |        |
|----------------------|--------------|-------------|-------|--------|
| <i>Trp53inp2</i>     | ILMN_2457585 | ILMN_189011 | -3.04 | 0.0024 |
| <i>Olfr131</i>       | ILMN_2997843 | ILMN_211670 | -3.04 | 0.0003 |
| <i>Leo1</i>          | ILMN_2903351 | ILMN_249636 | -3.04 | 0.0022 |
| <i>6430527G18Rik</i> | ILMN_3109491 | ILMN_230817 | -3.05 | 0.0000 |
| <i>Il1rn</i>         | ILMN_3151270 | ILMN_218418 | -3.05 | 0.0001 |
| <i>Sphk2</i>         | ILMN_2718791 | ILMN_218883 | -3.06 | 0.0029 |
| <i>4933433P14Rik</i> | ILMN_1237665 | ILMN_212198 | -3.06 | 0.0000 |
| <i>2610042L04Rik</i> | ILMN_3059346 | ILMN_226632 | -3.06 | 0.0001 |
| <i>Katnal1</i>       | ILMN_2971577 | ILMN_221323 | -3.07 | 0.0024 |
| <i>Pof1b</i>         | ILMN_1242912 | ILMN_221065 | -3.07 | 0.0008 |
| <i>E130319B15Rik</i> | ILMN_2590042 | ILMN_225010 | -3.07 | 0.0018 |
| <i>Olfr1364</i>      | ILMN_2612727 | ILMN_211121 | -3.07 | 0.0030 |
| <i>Ccl25</i>         | ILMN_2661722 | ILMN_215623 | -3.08 | 0.0000 |
| <i>Gnl3</i>          | ILMN_2673441 | ILMN_210042 | -3.09 | 0.0013 |
| <i>AU019823</i>      | ILMN_2875915 | ILMN_239543 | -3.09 | 0.0010 |
| <i>Acsm5</i>         | ILMN_1220520 | ILMN_215322 | -3.10 | 0.0040 |
| <i>Elk4</i>          | ILMN_1231726 | ILMN_209814 | -3.10 | 0.0015 |
| <i>Map1lc3a</i>      | ILMN_2832682 | ILMN_211286 | -3.11 | 0.0008 |
| <i>Dact1</i>         | ILMN_1230235 | ILMN_242104 | -3.11 | 0.0017 |
| <i>Clstn1</i>        | ILMN_2441501 | ILMN_187140 | -3.12 | 0.0020 |
| <i>Col24a1</i>       | ILMN_1231275 | ILMN_261313 | -3.12 | 0.0007 |
| <i>Pif1</i>          | ILMN_2714678 | ILMN_219875 | -3.12 | 0.0087 |
| <i>Stoml1</i>        | ILMN_1222000 | ILMN_218804 | -3.12 | 0.0000 |
| <i>Trps1</i>         | ILMN_2466527 | ILMN_190025 | -3.12 | 0.0025 |
| <i>Rspo3</i>         | ILMN_3162785 | ILMN_221501 | -3.12 | 0.0013 |
| <i>Nhs1</i>          | ILMN_2744492 | ILMN_222092 | -3.12 | 0.0002 |
| <i>Gm884</i>         | ILMN_2838901 | ILMN_252306 | -3.13 | 0.0009 |
| <i>Htt</i>           | ILMN_2672091 | ILMN_216523 | -3.13 | 0.0081 |
| <i>Dhrs9</i>         | ILMN_2631251 | ILMN_191346 | -3.13 | 0.0000 |
| <i>Deadc1</i>        | ILMN_2705097 | ILMN_219163 | -3.13 | 0.0034 |
| <i>Nola1</i>         | ILMN_1226280 | ILMN_222966 | -3.13 | 0.0058 |
| <i>Fbxo7</i>         | ILMN_2612683 | ILMN_211116 | -3.14 | 0.0000 |
| <i>Ube2d2</i>        | ILMN_1215117 | ILMN_189646 | -3.15 | 0.0029 |
| <i>Eln</i>           | ILMN_2697304 | ILMN_218560 | -3.15 | 0.0000 |
| <i>Setd4</i>         | ILMN_2670361 | ILMN_213178 | -3.16 | 0.0014 |
| <i>Casr</i>          | ILMN_2588631 | ILMN_208691 | -3.17 | 0.0003 |
| <i>Slc9a10</i>       | ILMN_2867343 | ILMN_232752 | -3.18 | 0.0000 |
| <i>Slc37a3</i>       | ILMN_2722497 | ILMN_219771 | -3.19 | 0.0019 |
| <i>Lyzl4</i>         | ILMN_1232761 | ILMN_219817 | -3.19 | 0.0002 |
| <i>Adamts2</i>       | ILMN_1226259 | ILMN_210818 | -3.19 | 0.0065 |
| <i>Gpam</i>          | ILMN_2655954 | ILMN_238446 | -3.19 | 0.0012 |
| <i>BC005764</i>      | ILMN_2709001 | ILMN_219445 | -3.20 | 0.0003 |
| <i>Zfp238</i>        | ILMN_3049032 | ILMN_245276 | -3.20 | 0.0019 |
| <i>Robo4</i>         | ILMN_1219026 | ILMN_186816 | -3.20 | 0.0000 |
| <i>Traf3ip1</i>      | ILMN_2990070 | ILMN_240687 | -3.22 | 0.0063 |
| <i>BC021395</i>      | ILMN_2776876 | ILMN_239185 | -3.22 | 0.0058 |
| <i>Tnfsf13b</i>      | ILMN_1226099 | ILMN_184661 | -3.22 | 0.0001 |
| <i>Ccdc98</i>        | ILMN_2908022 | ILMN_223050 | -3.23 | 0.0001 |
| <i>Nedd9</i>         | ILMN_2654186 | ILMN_211969 | -3.23 | 0.0002 |
| <i>Prnp</i>          | ILMN_2619316 | ILMN_211763 | -3.23 | 0.0007 |

|                           |              |             |       |        |
|---------------------------|--------------|-------------|-------|--------|
| <i>Lypla3</i>             | ILMN_1257060 | ILMN_217194 | -3.23 | 0.0045 |
| <i>Rnf208</i>             | ILMN_2636349 | ILMN_213366 | -3.23 | 0.0011 |
| <i>Hmx2</i>               | ILMN_3161049 | ILMN_231208 | -3.23 | 0.0002 |
| <i>Otof</i>               | ILMN_2674951 | ILMN_214752 | -3.23 | 0.0041 |
| <i>Cd44</i>               | ILMN_3114585 | ILMN_245439 | -3.24 | 0.0000 |
| <i>Cuzd1</i>              | ILMN_2592718 | ILMN_209118 | -3.24 | 0.0000 |
| <i>Aldh18a1</i>           | ILMN_3123473 | ILMN_253613 | -3.25 | 0.0021 |
| <i>Ptp4a2</i>             | ILMN_2725835 | ILMN_210989 | -3.25 | 0.0031 |
| <i>Zfp36l1</i>            | ILMN_1247853 | ILMN_185448 | -3.25 | 0.0001 |
| <i>Wnk1</i>               | ILMN_1241638 | ILMN_208893 | -3.25 | 0.0044 |
| <i>Slc7a10</i>            | ILMN_2705508 | ILMN_219193 | -3.25 | 0.0015 |
| <i>Zfp715</i>             | ILMN_2895084 | ILMN_208684 | -3.25 | 0.0008 |
| <i>Ppp2r5e</i>            | ILMN_2623244 | ILMN_249253 | -3.26 | 0.0021 |
| <i>Slc37a2</i>            | ILMN_2751120 | ILMN_222539 | -3.27 | 0.0008 |
| <i>Ercc8</i>              | ILMN_2719001 | ILMN_209905 | -3.27 | 0.0007 |
| <i>Gcnt1</i>              | ILMN_1256299 | ILMN_214513 | -3.27 | 0.0007 |
| <i>Olfr975</i>            | ILMN_2625468 | ILMN_212353 | -3.27 | 0.0050 |
| <i>Gtse1</i>              | ILMN_2908070 | ILMN_215955 | -3.28 | 0.0000 |
| <i>Foxh1</i>              | ILMN_2659741 | ILMN_215454 | -3.28 | 0.0024 |
| <i>Edg6</i>               | ILMN_2839479 | ILMN_210265 | -3.29 | 0.0001 |
| <i>2810416G20Rik</i>      | ILMN_2988818 | ILMN_230931 | -3.29 | 0.0013 |
| <i>Il12a</i>              | ILMN_2706462 | ILMN_242787 | -3.30 | 0.0001 |
| <i>Gm815</i>              | ILMN_2975865 | ILMN_248037 | -3.30 | 0.0002 |
| <i>Disc1</i>              | ILMN_3118664 | ILMN_230984 | -3.30 | 0.0000 |
| <i>EG633640</i>           | ILMN_2977390 | ILMN_238251 | -3.30 | 0.0024 |
| <i>Maml3</i>              | ILMN_2950067 | ILMN_237161 | -3.32 | 0.0000 |
| <i>Def6</i>               | ILMN_2595842 | ILMN_209446 | -3.33 | 0.0000 |
| <i>Als2cr4</i>            | ILMN_3135801 | ILMN_246204 | -3.33 | 0.0001 |
| <i>Lcn8</i>               | ILMN_2733045 | ILMN_221254 | -3.33 | 0.0012 |
| <i>Ash2l</i>              | ILMN_2485900 | ILMN_192198 | -3.33 | 0.0001 |
| <i>Sox9</i>               | ILMN_3007428 | ILMN_261259 | -3.34 | 0.0001 |
| <i>Dgkz</i>               | ILMN_2915060 | ILMN_210741 | -3.34 | 0.0014 |
| <i>Psm2</i>               | ILMN_2682947 | ILMN_217415 | -3.34 | 0.0000 |
| <i>Pdzd3</i>              | ILMN_1258691 | ILMN_216198 | -3.34 | 0.0012 |
| <i>Wdr8</i>               | ILMN_2432829 | ILMN_186126 | -3.34 | 0.0013 |
| <i>LOC100048638</i>       | ILMN_1249743 | ILMN_313088 | -3.35 | 0.0000 |
| <i>LOC625360</i>          | ILMN_2845658 | ILMN_257506 | -3.35 | 0.0002 |
| <i>Rasa2</i>              | ILMN_2715328 | ILMN_237560 | -3.35 | 0.0026 |
| <i>Nrip3</i>              | ILMN_2875404 | ILMN_217092 | -3.35 | 0.0014 |
| <i>Il8rb</i>              | ILMN_2737157 | ILMN_221556 | -3.35 | 0.0012 |
| <i>Krr1</i>               | ILMN_1218250 | ILMN_230837 | -3.35 | 0.0009 |
| <i>Cab39l</i>             | ILMN_1217943 | ILMN_213138 | -3.36 | 0.0000 |
| <i>Hectd2</i>             | ILMN_1252222 | ILMN_211710 | -3.36 | 0.0002 |
| <i>Reck</i>               | ILMN_2812614 | ILMN_231246 | -3.36 | 0.0000 |
| <i>6330403K07Rik</i>      | ILMN_2594139 | ILMN_209264 | -3.36 | 0.0004 |
| <i>OTTMUSG00000000421</i> | ILMN_2824954 | ILMN_234919 | -3.36 | 0.0002 |
| <i>Olfr232</i>            | ILMN_2830349 | ILMN_227449 | -3.37 | 0.0004 |
| <i>Bcor1</i>              | ILMN_2755424 | ILMN_222829 | -3.37 | 0.0001 |
| <i>Olfr876</i>            | ILMN_2640485 | ILMN_257982 | -3.37 | 0.0000 |
| <i>Olfr1189</i>           | ILMN_1242368 | ILMN_214482 | -3.38 | 0.0000 |

|                      |              |             |       |        |
|----------------------|--------------|-------------|-------|--------|
| <i>Smcr7</i>         | ILMN_2995370 | ILMN_236162 | -3.38 | 0.0033 |
| <i>LOC100046207</i>  | ILMN_2748897 | ILMN_315638 | -3.39 | 0.0001 |
| <i>Exosc2</i>        | ILMN_2683326 | ILMN_196609 | -3.39 | 0.0004 |
| <i>Psmc5</i>         | ILMN_1251877 | ILMN_214862 | -3.40 | 0.0013 |
| <i>D5Ertd135e</i>    | ILMN_2950270 | ILMN_224382 | -3.40 | 0.0000 |
| <i>Saa2</i>          | ILMN_2758571 | ILMN_223044 | -3.40 | 0.0018 |
| <i>B4galnt4</i>      | ILMN_2789862 | ILMN_233892 | -3.40 | 0.0006 |
| <i>Pex10</i>         | ILMN_2941122 | ILMN_244327 | -3.40 | 0.0017 |
| <i>Zfyve19</i>       | ILMN_2826947 | ILMN_188987 | -3.40 | 0.0068 |
| <i>Duox2</i>         | ILMN_2622260 | ILMN_230561 | -3.41 | 0.0080 |
| <i>Olfr913</i>       | ILMN_1232331 | ILMN_255917 | -3.41 | 0.0004 |
| <i>Fgfr1</i>         | ILMN_2727068 | ILMN_216804 | -3.41 | 0.0003 |
| <i>Ctdsp1</i>        | ILMN_1213307 | ILMN_212383 | -3.42 | 0.0005 |
| <i>4930504E06Rik</i> | ILMN_2630827 | ILMN_212829 | -3.42 | 0.0028 |
| <i>Hspa1a</i>        | ILMN_2829594 | ILMN_257431 | -3.42 | 0.0003 |
| <i>Ipo7</i>          | ILMN_2619968 | ILMN_238304 | -3.42 | 0.0001 |
| <i>Ank1</i>          | ILMN_2609011 | ILMN_208704 | -3.42 | 0.0086 |
| <i>Npffr2</i>        | ILMN_3145557 | ILMN_220560 | -3.42 | 0.0001 |
| <i>Kdelr3</i>        | ILMN_2675697 | ILMN_240560 | -3.42 | 0.0002 |
| <i>AA408296</i>      | ILMN_2631230 | ILMN_211104 | -3.43 | 0.0002 |
| <i>Zpld1</i>         | ILMN_2735680 | ILMN_221441 | -3.43 | 0.0032 |
| <i>Rpl23</i>         | ILMN_1238227 | ILMN_214598 | -3.44 | 0.0014 |
| <i>Pik3r3</i>        | ILMN_1226157 | ILMN_212250 | -3.44 | 0.0003 |
| <i>Dsp</i>           | ILMN_2654997 | ILMN_255543 | -3.44 | 0.0002 |
| <i>Myog</i>          | ILMN_2863674 | ILMN_212019 | -3.44 | 0.0008 |
| <i>Cdkn1a</i>        | ILMN_2846775 | ILMN_209664 | -3.45 | 0.0001 |
| <i>Pcdhga7</i>       | ILMN_1252556 | ILMN_210424 | -3.45 | 0.0015 |
| <i>Mark3</i>         | ILMN_3134078 | ILMN_245400 | -3.46 | 0.0020 |
| <i>A630077B13Rik</i> | ILMN_1249864 | ILMN_220279 | -3.46 | 0.0000 |
| <i>Agpat5</i>        | ILMN_1250939 | ILMN_212222 | -3.47 | 0.0002 |
| <i>Kcnk1</i>         | ILMN_3009501 | ILMN_237297 | -3.47 | 0.0000 |
| <i>Mapk7</i>         | ILMN_1232294 | ILMN_217900 | -3.47 | 0.0000 |
| <i>Stxbp1</i>        | ILMN_2644632 | ILMN_214135 | -3.49 | 0.0000 |
| <i>Olfr194</i>       | ILMN_3161142 | ILMN_257433 | -3.50 | 0.0031 |
| <i>Rorc</i>          | ILMN_2760272 | ILMN_223173 | -3.50 | 0.0053 |
| <i>Gpr82</i>         | ILMN_1238020 | ILMN_221259 | -3.51 | 0.0095 |
| <i>Cdipt</i>         | ILMN_1224421 | ILMN_210695 | -3.52 | 0.0040 |
| <i>Mtvr2</i>         | ILMN_3108203 | ILMN_252009 | -3.52 | 0.0000 |
| <i>Afmid</i>         | ILMN_2600443 | ILMN_209564 | -3.52 | 0.0000 |
| <i>Gramd1c</i>       | ILMN_2616382 | ILMN_211488 | -3.53 | 0.0000 |
| <i>Pcgf6</i>         | ILMN_1251165 | ILMN_222533 | -3.54 | 0.0014 |
| <i>Siah1b</i>        | ILMN_2903734 | ILMN_211639 | -3.54 | 0.0001 |
| <i>Hexb</i>          | ILMN_2829330 | ILMN_221504 | -3.54 | 0.0000 |
| <i>Nap1l1</i>        | ILMN_3004970 | ILMN_214137 | -3.54 | 0.0000 |
| <i>Fgd4</i>          | ILMN_2610084 | ILMN_210876 | -3.55 | 0.0006 |
| <i>Tmeff2</i>        | ILMN_2935998 | ILMN_194817 | -3.56 | 0.0000 |
| <i>Dolpp1</i>        | ILMN_2966370 | ILMN_220141 | -3.56 | 0.0000 |
| <i>Gpx6</i>          | ILMN_2792028 | ILMN_233571 | -3.57 | 0.0000 |
| <i>Six2</i>          | ILMN_2742627 | ILMN_221958 | -3.57 | 0.0000 |
| <i>Mtap1s</i>        | ILMN_2657432 | ILMN_215270 | -3.57 | 0.0001 |

|                      |              |             |       |        |
|----------------------|--------------|-------------|-------|--------|
| <i>1700123L14Rik</i> | ILMN_2925702 | ILMN_228979 | -3.57 | 0.0001 |
| <i>Pcdha6</i>        | ILMN_3155884 | ILMN_208968 | -3.57 | 0.0000 |
| <i>1200002N14Rik</i> | ILMN_1219820 | ILMN_213609 | -3.58 | 0.0000 |
| <i>Spib</i>          | ILMN_2933168 | ILMN_258029 | -3.58 | 0.0017 |
| <i>Cdk2</i>          | ILMN_1233064 | ILMN_256716 | -3.58 | 0.0000 |
| <i>Zmiz1</i>         | ILMN_1224736 | ILMN_258289 | -3.59 | 0.0001 |
| <i>Bnc2</i>          | ILMN_2721466 | ILMN_220395 | -3.59 | 0.0000 |
| <i>Cxx1a</i>         | ILMN_2952779 | ILMN_226958 | -3.59 | 0.0008 |
| <i>Gabrp</i>         | ILMN_1221640 | ILMN_212083 | -3.60 | 0.0001 |
| <i>Msh3</i>          | ILMN_3068452 | ILMN_232099 | -3.60 | 0.0000 |
| <i>Obscn</i>         | ILMN_2693176 | ILMN_226087 | -3.60 | 0.0004 |
| <i>Rab11fip2</i>     | ILMN_2933151 | ILMN_238924 | -3.61 | 0.0030 |
| <i>Olfr103</i>       | ILMN_1244967 | ILMN_219546 | -3.61 | 0.0000 |
| <i>Stx2</i>          | ILMN_2657575 | ILMN_215282 | -3.62 | 0.0029 |
| <i>Olfr1366</i>      | ILMN_2629280 | ILMN_212694 | -3.62 | 0.0002 |
| <i>Vti1b</i>         | ILMN_2503190 | ILMN_194080 | -3.62 | 0.0003 |
| <i>Aym1</i>          | ILMN_3162325 | ILMN_235462 | -3.62 | 0.0030 |
| <i>Sf3b4</i>         | ILMN_3051392 | ILMN_211099 | -3.63 | 0.0029 |
| <i>Mogat2</i>        | ILMN_2854920 | ILMN_211610 | -3.63 | 0.0014 |
| <i>Ikzf1</i>         | ILMN_3127790 | ILMN_229247 | -3.63 | 0.0000 |
| <i>Osbpl1a</i>       | ILMN_2711676 | ILMN_215509 | -3.64 | 0.0000 |
| <i>AB182283</i>      | ILMN_2891085 | ILMN_240594 | -3.65 | 0.0003 |
| <i>Prlr</i>          | ILMN_2617005 | ILMN_210332 | -3.67 | 0.0002 |
| <i>Appbp1</i>        | ILMN_2955356 | ILMN_212180 | -3.68 | 0.0000 |
| <i>Tbc1d10b</i>      | ILMN_3008497 | ILMN_237726 | -3.68 | 0.0002 |
| <i>Krt18</i>         | ILMN_2711267 | ILMN_219615 | -3.68 | 0.0015 |
| <i>Mdga2</i>         | ILMN_2722424 | ILMN_214652 | -3.68 | 0.0030 |
| <i>Cplx2</i>         | ILMN_1238436 | ILMN_219945 | -3.69 | 0.0002 |
| <i>Zfp90</i>         | ILMN_2487482 | ILMN_192371 | -3.71 | 0.0000 |
| <i>Cnot2</i>         | ILMN_3162796 | ILMN_242279 | -3.71 | 0.0019 |
| <i>Es1</i>           | ILMN_2704749 | ILMN_218872 | -3.72 | 0.0016 |
| <i>1700123D08Rik</i> | ILMN_2863712 | ILMN_242440 | -3.72 | 0.0017 |
| <i>Orai2</i>         | ILMN_2624293 | ILMN_212237 | -3.73 | 0.0000 |
| <i>Rsb1</i>          | ILMN_2589576 | ILMN_208791 | -3.73 | 0.0001 |
| <i>5330421F07Rik</i> | ILMN_2592597 | ILMN_209106 | -3.74 | 0.0044 |
| <i>Fcrl1</i>         | ILMN_2608151 | ILMN_210682 | -3.74 | 0.0000 |
| <i>Rnase6</i>        | ILMN_2759309 | ILMN_223096 | -3.74 | 0.0014 |
| <i>Mansc1</i>        | ILMN_2848273 | ILMN_212652 | -3.74 | 0.0002 |
| <i>Dclre1b</i>       | ILMN_2669813 | ILMN_224631 | -3.74 | 0.0005 |
| <i>Pstpip2</i>       | ILMN_2722513 | ILMN_232180 | -3.74 | 0.0005 |
| <i>D12Ertd551e</i>   | ILMN_1240131 | ILMN_211409 | -3.75 | 0.0000 |
| <i>Olfr1330</i>      | ILMN_2864972 | ILMN_217835 | -3.75 | 0.0000 |
| <i>Cnih</i>          | ILMN_1237640 | ILMN_228365 | -3.75 | 0.0000 |
| <i>Syt10</i>         | ILMN_2724250 | ILMN_220601 | -3.76 | 0.0014 |
| <i>Arl4d</i>         | ILMN_2593709 | ILMN_209218 | -3.76 | 0.0007 |
| <i>Dhrs9</i>         | ILMN_2602089 | ILMN_261046 | -3.76 | 0.0001 |
| <i>Asb6</i>          | ILMN_1254737 | ILMN_213066 | -3.76 | 0.0001 |
| <i>Igsf1</i>         | ILMN_2759192 | ILMN_223086 | -3.76 | 0.0000 |
| <i>Slfn3</i>         | ILMN_2908122 | ILMN_222964 | -3.77 | 0.0053 |
| <i>Siglec1</i>       | ILMN_2762966 | ILMN_223354 | -3.77 | 0.0002 |

|                      |              |             |       |        |
|----------------------|--------------|-------------|-------|--------|
| <i>Chchd3</i>        | ILMN_1243188 | ILMN_216695 | -3.80 | 0.0000 |
| <i>Sh3pxd2a</i>      | ILMN_1227918 | ILMN_211991 | -3.80 | 0.0000 |
| <i>Acpp</i>          | ILMN_2693019 | ILMN_218213 | -3.81 | 0.0000 |
| <i>Elf5</i>          | ILMN_2736380 | ILMN_216298 | -3.81 | 0.0000 |
| <i>4930432O21Rik</i> | ILMN_3006178 | ILMN_241163 | -3.81 | 0.0000 |
| <i>Tcl1b3</i>        | ILMN_2921240 | ILMN_231961 | -3.82 | 0.0056 |
| <i>V1rh6</i>         | ILMN_2867574 | ILMN_236849 | -3.82 | 0.0000 |
| <i>Trpm3</i>         | ILMN_2427909 | ILMN_255895 | -3.83 | 0.0009 |
| <i>Scmh1</i>         | ILMN_1230766 | ILMN_247166 | -3.84 | 0.0000 |
| <i>Lman1l</i>        | ILMN_1212980 | ILMN_214284 | -3.85 | 0.0000 |
| <i>Psip1</i>         | ILMN_2617478 | ILMN_211417 | -3.85 | 0.0000 |
| <i>Hoxa9</i>         | ILMN_2772762 | ILMN_210756 | -3.85 | 0.0001 |
| <i>Copg</i>          | ILMN_1233848 | ILMN_236440 | -3.85 | 0.0007 |
| <i>Cacng5</i>        | ILMN_1226821 | ILMN_217419 | -3.85 | 0.0012 |
| <i>Nexn</i>          | ILMN_2669215 | ILMN_211900 | -3.86 | 0.0000 |
| <i>Slc25a3</i>       | ILMN_2751046 | ILMN_222536 | -3.86 | 0.0000 |
| <i>Olfr42</i>        | ILMN_2592893 | ILMN_209137 | -3.86 | 0.0000 |
| <i>Al661453</i>      | ILMN_2830520 | ILMN_214565 | -3.87 | 0.0002 |
| <i>Upp1</i>          | ILMN_2959293 | ILMN_187510 | -3.87 | 0.0009 |
| <i>Hrasls5</i>       | ILMN_2999683 | ILMN_218409 | -3.87 | 0.0000 |
| <i>Dab2ip</i>        | ILMN_2615559 | ILMN_233597 | -3.88 | 0.0000 |
| <i>Grk5</i>          | ILMN_2637571 | ILMN_212032 | -3.88 | 0.0000 |
| <i>Gjb1</i>          | ILMN_2948476 | ILMN_219510 | -3.90 | 0.0006 |
| <i>Hmgn3</i>         | ILMN_1247704 | ILMN_214141 | -3.90 | 0.0003 |
| <i>Psg19</i>         | ILMN_1227375 | ILMN_213508 | -3.90 | 0.0000 |
| <i>Zfp78</i>         | ILMN_1260400 | ILMN_232784 | -3.90 | 0.0000 |
| <i>2810002I04Rik</i> | ILMN_2711181 | ILMN_219611 | -3.92 | 0.0000 |
| <i>Olfr518</i>       | ILMN_2673414 | ILMN_224849 | -3.92 | 0.0008 |
| <i>Syvn1</i>         | ILMN_2628258 | ILMN_212597 | -3.92 | 0.0070 |
| <i>Cntn4</i>         | ILMN_2710524 | ILMN_216888 | -3.94 | 0.0000 |
| <i>Lyzs</i>          | ILMN_2939681 | ILMN_261574 | -3.95 | 0.0036 |
| <i>Gtse1</i>         | ILMN_1226369 | ILMN_215955 | -3.95 | 0.0056 |
| <i>Zmat5</i>         | ILMN_2690772 | ILMN_218036 | -3.95 | 0.0000 |
| <i>Hemgn</i>         | ILMN_1239447 | ILMN_212528 | -3.95 | 0.0046 |
| <i>Ceacam16</i>      | ILMN_1225476 | ILMN_247696 | -3.96 | 0.0000 |
| <i>Capn6</i>         | ILMN_2695143 | ILMN_218388 | -3.96 | 0.0000 |
| <i>LOC100047670</i>  | ILMN_1254554 | ILMN_310142 | -3.96 | 0.0010 |
| <i>Zfp423</i>        | ILMN_2469366 | ILMN_190347 | -3.96 | 0.0086 |
| <i>Ern2</i>          | ILMN_1214511 | ILMN_209279 | -3.97 | 0.0012 |
| <i>Hecw2</i>         | ILMN_3098718 | ILMN_257854 | -3.97 | 0.0000 |
| <i>Prdm14</i>        | ILMN_3037312 | ILMN_246565 | -3.97 | 0.0079 |
| <i>EG218444</i>      | ILMN_2682702 | ILMN_217392 | -3.98 | 0.0000 |
| <i>Atmin</i>         | ILMN_2701824 | ILMN_218909 | -3.99 | 0.0062 |
| <i>Stra13</i>        | ILMN_2836023 | ILMN_215353 | -3.99 | 0.0001 |
| <i>Pipox</i>         | ILMN_2916202 | ILMN_217942 | -3.99 | 0.0000 |
| <i>Es22</i>          | ILMN_2627528 | ILMN_212535 | -4.01 | 0.0000 |
| <i>1110038F14Rik</i> | ILMN_2629375 | ILMN_212705 | -4.01 | 0.0000 |
| <i>Creld2</i>        | ILMN_2983948 | ILMN_222963 | -4.02 | 0.0000 |
| <i>Fa2h</i>          | ILMN_2746783 | ILMN_222241 | -4.03 | 0.0000 |
| <i>Tcfap2b</i>       | ILMN_2760450 | ILMN_217594 | -4.04 | 0.0000 |

|                      |              |             |       |        |
|----------------------|--------------|-------------|-------|--------|
| <i>Ccdc66</i>        | ILMN_2699509 | ILMN_218730 | -4.04 | 0.0000 |
| <i>Ptprs</i>         | ILMN_2737758 | ILMN_212655 | -4.04 | 0.0001 |
| <i>Ap2b1</i>         | ILMN_1252951 | ILMN_211225 | -4.04 | 0.0000 |
| <i>Hic2</i>          | ILMN_2677332 | ILMN_254142 | -4.04 | 0.0000 |
| <i>Atg2a</i>         | ILMN_2963432 | ILMN_258683 | -4.04 | 0.0000 |
| <i>Gabrb3</i>        | ILMN_3044905 | ILMN_240761 | -4.05 | 0.0000 |
| <i>Atp2a3</i>        | ILMN_2688236 | ILMN_213534 | -4.06 | 0.0000 |
| <i>1110013L07Rik</i> | ILMN_1217406 | ILMN_227473 | -4.07 | 0.0000 |
| <i>LOC100046775</i>  | ILMN_1225654 | ILMN_313813 | -4.08 | 0.0001 |
| <i>2610109H07Rik</i> | ILMN_3089931 | ILMN_236248 | -4.08 | 0.0000 |
| <i>Ascl3</i>         | ILMN_2691996 | ILMN_218130 | -4.09 | 0.0001 |
| <i>Paox</i>          | ILMN_1220022 | ILMN_212962 | -4.09 | 0.0001 |
| <i>Dpp9</i>          | ILMN_2964344 | ILMN_220414 | -4.09 | 0.0000 |
| <i>Esrrg</i>         | ILMN_1245243 | ILMN_231171 | -4.10 | 0.0006 |
| <i>Zfp259</i>        | ILMN_1241970 | ILMN_185497 | -4.12 | 0.0000 |
| <i>Prokr1</i>        | ILMN_2612018 | ILMN_208651 | -4.12 | 0.0002 |
| <i>Mfn2</i>          | ILMN_2641278 | ILMN_213835 | -4.12 | 0.0000 |
| <i>F630003A18Rik</i> | ILMN_2831116 | ILMN_221558 | -4.12 | 0.0011 |
| <i>Rbm12</i>         | ILMN_2626300 | ILMN_212426 | -4.13 | 0.0000 |
| <i>Cdyl</i>          | ILMN_2680574 | ILMN_245690 | -4.13 | 0.0036 |
| <i>Slit2</i>         | ILMN_1253797 | ILMN_259247 | -4.14 | 0.0074 |
| <i>Oaf</i>           | ILMN_2895584 | ILMN_222394 | -4.15 | 0.0000 |
| <i>Mfng</i>          | ILMN_2687661 | ILMN_212859 | -4.16 | 0.0000 |
| <i>Cdkl2</i>         | ILMN_2657791 | ILMN_215298 | -4.16 | 0.0000 |
| <i>Bglap2</i>        | ILMN_2944508 | ILMN_226483 | -4.18 | 0.0000 |
| <i>Itga5</i>         | ILMN_2849449 | ILMN_216359 | -4.20 | 0.0000 |
| <i>Fabp5</i>         | ILMN_1235908 | ILMN_216304 | -4.20 | 0.0000 |
| <i>Olfm1</i>         | ILMN_3091574 | ILMN_228694 | -4.21 | 0.0000 |
| <i>Ccdc59</i>        | ILMN_2877436 | ILMN_212729 | -4.21 | 0.0009 |
| <i>Ptgis</i>         | ILMN_2724942 | ILMN_220660 | -4.22 | 0.0000 |
| <i>Dync1h1</i>       | ILMN_2689274 | ILMN_217915 | -4.22 | 0.0000 |
| <i>Ppp1r3f</i>       | ILMN_1255926 | ILMN_253828 | -4.23 | 0.0002 |
| <i>A130022J15Rik</i> | ILMN_2650183 | ILMN_214637 | -4.23 | 0.0000 |
| <i>Arfp2</i>         | ILMN_1233495 | ILMN_211782 | -4.24 | 0.0017 |
| <i>Asgr1</i>         | ILMN_2608703 | ILMN_210744 | -4.25 | 0.0000 |
| <i>Cln1</i>          | ILMN_2802672 | ILMN_218275 | -4.25 | 0.0001 |
| <i>Olfr1413</i>      | ILMN_2757778 | ILMN_222991 | -4.27 | 0.0000 |
| <i>Zfp169</i>        | ILMN_1244864 | ILMN_222842 | -4.27 | 0.0000 |
| <i>Wdr53</i>         | ILMN_2706964 | ILMN_224672 | -4.29 | 0.0000 |
| <i>Zmat3</i>         | ILMN_2418426 | ILMN_184413 | -4.30 | 0.0001 |
| <i>Jak2</i>          | ILMN_1245579 | ILMN_214833 | -4.31 | 0.0000 |
| <i>Gmcl1</i>         | ILMN_3009951 | ILMN_214119 | -4.31 | 0.0001 |
| <i>Apex2</i>         | ILMN_1240188 | ILMN_193546 | -4.32 | 0.0000 |
| <i>Tcfap2b</i>       | ILMN_3151298 | ILMN_238889 | -4.32 | 0.0002 |
| <i>Cno</i>           | ILMN_2591411 | ILMN_208978 | -4.33 | 0.0000 |
| <i>Paf1</i>          | ILMN_2744968 | ILMN_220830 | -4.34 | 0.0008 |
| <i>Muc13</i>         | ILMN_2717678 | ILMN_217318 | -4.34 | 0.0019 |
| <i>Cldn4</i>         | ILMN_1223949 | ILMN_209388 | -4.35 | 0.0000 |
| <i>Bcl2l10</i>       | ILMN_1215546 | ILMN_218595 | -4.36 | 0.0031 |
| <i>Rps6ka4</i>       | ILMN_2740764 | ILMN_221814 | -4.36 | 0.0001 |

|                           |              |             |       |        |
|---------------------------|--------------|-------------|-------|--------|
| <i>Al597479</i>           | ILMN_2970241 | ILMN_215743 | -4.37 | 0.0000 |
| <i>Gps1</i>               | ILMN_1254788 | ILMN_209986 | -4.38 | 0.0000 |
| <i>Ccdc68</i>             | ILMN_2929572 | ILMN_223560 | -4.41 | 0.0005 |
| <i>Abcc6</i>              | ILMN_2934941 | ILMN_209934 | -4.42 | 0.0010 |
| <i>Atp2a3</i>             | ILMN_2900462 | ILMN_213534 | -4.42 | 0.0000 |
| <i>P2ry2</i>              | ILMN_2872106 | ILMN_217971 | -4.43 | 0.0000 |
| <i>Olfr113</i>            | ILMN_2759037 | ILMN_223076 | -4.44 | 0.0000 |
| <i>BC011426</i>           | ILMN_1214025 | ILMN_220716 | -4.45 | 0.0000 |
| <i>Nfam1</i>              | ILMN_1248347 | ILMN_218492 | -4.46 | 0.0000 |
| <i>Kcnab1</i>             | ILMN_1216469 | ILMN_211650 | -4.48 | 0.0000 |
| <i>Preb</i>               | ILMN_2683621 | ILMN_234820 | -4.49 | 0.0000 |
| <i>ENSMUSG00000073257</i> | ILMN_3083227 | ILMN_229047 | -4.49 | 0.0035 |
| <i>Chrna9</i>             | ILMN_2717580 | ILMN_220096 | -4.50 | 0.0000 |
| <i>Klra16</i>             | ILMN_3005175 | ILMN_196756 | -4.50 | 0.0000 |
| <i>Tapbpl</i>             | ILMN_2606498 | ILMN_196775 | -4.50 | 0.0000 |
| <i>Bglap-rs1</i>          | ILMN_1233122 | ILMN_236469 | -4.51 | 0.0035 |
| <i>Olfr606</i>            | ILMN_2741953 | ILMN_233001 | -4.53 | 0.0000 |
| <i>Stac</i>               | ILMN_1245844 | ILMN_220646 | -4.54 | 0.0000 |
| <i>Arglu1</i>             | ILMN_2594128 | ILMN_256792 | -4.55 | 0.0000 |
| <i>Sync</i>               | ILMN_2982123 | ILMN_217966 | -4.55 | 0.0000 |
| <i>Wnk2</i>               | ILMN_1214402 | ILMN_225853 | -4.55 | 0.0000 |
| <i>Madcam1</i>            | ILMN_2865448 | ILMN_220787 | -4.56 | 0.0000 |
| <i>Foxi2</i>              | ILMN_2894125 | ILMN_219115 | -4.56 | 0.0000 |
| <i>Arrdc3</i>             | ILMN_2666279 | ILMN_216006 | -4.57 | 0.0000 |
| <i>D17H6S56E-3</i>        | ILMN_2889044 | ILMN_223316 | -4.58 | 0.0005 |
| <i>Hist1h2ao</i>          | ILMN_2836654 | ILMN_196731 | -4.62 | 0.0000 |
| <i>Npal2</i>              | ILMN_2723369 | ILMN_235586 | -4.65 | 0.0046 |
| <i>Mup4</i>               | ILMN_2592166 | ILMN_209061 | -4.66 | 0.0000 |
| <i>Rgs1</i>               | ILMN_2897891 | ILMN_226813 | -4.67 | 0.0000 |
| <i>Usmg5</i>              | ILMN_1219002 | ILMN_194875 | -4.67 | 0.0000 |
| <i>Cish</i>               | ILMN_2718330 | ILMN_220158 | -4.69 | 0.0000 |
| <i>Arc</i>                | ILMN_2597827 | ILMN_209647 | -4.69 | 0.0009 |
| <i>Dcx</i>                | ILMN_2931623 | ILMN_214635 | -4.71 | 0.0014 |
| <i>Ank2</i>               | ILMN_3158444 | ILMN_235890 | -4.72 | 0.0000 |
| <i>Olfr1491</i>           | ILMN_1256579 | ILMN_223138 | -4.74 | 0.0000 |
| <i>BC049635</i>           | ILMN_3125842 | ILMN_211809 | -4.75 | 0.0004 |
| <i>2310008H04Rik</i>      | ILMN_2964816 | ILMN_244230 | -4.75 | 0.0000 |
| <i>Ptpdc1</i>             | ILMN_2805624 | ILMN_244829 | -4.75 | 0.0000 |
| <i>Tceb1</i>              | ILMN_2995698 | ILMN_208836 | -4.76 | 0.0000 |
| <i>Olfr628</i>            | ILMN_2593666 | ILMN_209214 | -4.79 | 0.0000 |
| <i>Bid</i>                | ILMN_2757287 | ILMN_208644 | -4.79 | 0.0000 |
| <i>4932414N04Rik</i>      | ILMN_2888872 | ILMN_240286 | -4.80 | 0.0000 |
| <i>Vps33b</i>             | ILMN_2864844 | ILMN_184886 | -4.82 | 0.0002 |
| <i>Anks6</i>              | ILMN_2612904 | ILMN_240901 | -4.82 | 0.0013 |
| <i>Slc44a2</i>            | ILMN_1232195 | ILMN_209839 | -4.82 | 0.0000 |
| <i>Ttc3</i>               | ILMN_2841721 | ILMN_187235 | -4.82 | 0.0000 |
| <i>Tns4</i>               | ILMN_1236029 | ILMN_216838 | -4.83 | 0.0000 |
| <i>5330439J01Rik</i>      | ILMN_2772728 | ILMN_224379 | -4.84 | 0.0000 |
| <i>9130005N14Rik</i>      | ILMN_1217235 | ILMN_211732 | -4.85 | 0.0000 |
| <i>Ulk2</i>               | ILMN_1244059 | ILMN_186492 | -4.86 | 0.0000 |

|                      |              |             |       |        |
|----------------------|--------------|-------------|-------|--------|
| <i>Dnase1</i>        | ILMN_2734251 | ILMN_214587 | -4.87 | 0.0000 |
| <i>Cdc5l</i>         | ILMN_2754425 | ILMN_216571 | -4.88 | 0.0000 |
| <i>Zmyx2</i>         | ILMN_1245540 | ILMN_185418 | -4.90 | 0.0000 |
| <i>Snx13</i>         | ILMN_2877227 | ILMN_261707 | -4.91 | 0.0000 |
| <i>Iars</i>          | ILMN_2810045 | ILMN_212043 | -4.92 | 0.0000 |
| <i>Phtf1</i>         | ILMN_2939522 | ILMN_231517 | -4.93 | 0.0002 |
| <i>Dlat</i>          | ILMN_2757993 | ILMN_223004 | -4.94 | 0.0000 |
| <i>Sidt1</i>         | ILMN_1248211 | ILMN_256339 | -4.95 | 0.0000 |
| <i>Rcan2</i>         | ILMN_3033007 | ILMN_220888 | -4.97 | 0.0000 |
| <i>Pcnt</i>          | ILMN_2721221 | ILMN_220374 | -4.97 | 0.0000 |
| <i>Shh</i>           | ILMN_2802979 | ILMN_260687 | -4.99 | 0.0000 |
| <i>Prrx1</i>         | ILMN_3057018 | ILMN_252720 | -5.01 | 0.0000 |
| <i>Cachd1</i>        | ILMN_1241872 | ILMN_218385 | -5.02 | 0.0004 |
| <i>EG574403</i>      | ILMN_3162060 | ILMN_256035 | -5.03 | 0.0019 |
| <i>Tgjf1</i>         | ILMN_1253854 | ILMN_211263 | -5.05 | 0.0000 |
| <i>Car15</i>         | ILMN_2871660 | ILMN_217620 | -5.10 | 0.0000 |
| <i>Dmrtc1b</i>       | ILMN_2929990 | ILMN_234785 | -5.11 | 0.0000 |
| <i>5830417C01Rik</i> | ILMN_2741737 | ILMN_212594 | -5.12 | 0.0000 |
| <i>Phf2011</i>       | ILMN_1254531 | ILMN_253113 | -5.12 | 0.0001 |
| <i>Ccrk</i>          | ILMN_2627072 | ILMN_212415 | -5.15 | 0.0000 |
| <i>Pparbp</i>        | ILMN_2658227 | ILMN_215333 | -5.16 | 0.0000 |
| <i>Calm3</i>         | ILMN_1215681 | ILMN_219075 | -5.16 | 0.0000 |
| <i>Svop</i>          | ILMN_2765454 | ILMN_227659 | -5.19 | 0.0004 |
| <i>Cdkl1</i>         | ILMN_2852737 | ILMN_210720 | -5.20 | 0.0000 |
| <i>Serpinb8</i>      | ILMN_2829250 | ILMN_214122 | -5.21 | 0.0000 |
| <i>Rab22a</i>        | ILMN_1214708 | ILMN_225250 | -5.21 | 0.0000 |
| <i>Tbx3</i>          | ILMN_3139514 | ILMN_212973 | -5.26 | 0.0000 |
| <i>Dpf3</i>          | ILMN_2853983 | ILMN_211654 | -5.27 | 0.0000 |
| <i>Erh</i>           | ILMN_2919786 | ILMN_212781 | -5.29 | 0.0000 |
| <i>Kcna10</i>        | ILMN_1240294 | ILMN_261328 | -5.33 | 0.0000 |
| <i>Med7</i>          | ILMN_1225666 | ILMN_223180 | -5.34 | 0.0002 |
| <i>Sertad4</i>       | ILMN_2918656 | ILMN_220872 | -5.38 | 0.0000 |
| <i>LOC100046039</i>  | ILMN_2733514 | ILMN_319133 | -5.38 | 0.0000 |
| <i>Ythdf2</i>        | ILMN_2868374 | ILMN_239002 | -5.41 | 0.0000 |
| <i>Ifi202b</i>       | ILMN_3014753 | ILMN_210704 | -5.48 | 0.0000 |
| <i>Copg</i>          | ILMN_3074952 | ILMN_236440 | -5.49 | 0.0000 |
| <i>Cand2</i>         | ILMN_2619869 | ILMN_211826 | -5.50 | 0.0000 |
| <i>Tmem44</i>        | ILMN_2661495 | ILMN_259693 | -5.53 | 0.0000 |
| <i>Herc2</i>         | ILMN_2717727 | ILMN_220107 | -5.61 | 0.0000 |
| <i>Abcb4</i>         | ILMN_2648742 | ILMN_214510 | -5.61 | 0.0000 |
| <i>4121402D02Rik</i> | ILMN_2746421 | ILMN_210984 | -5.64 | 0.0002 |
| <i>Snapin</i>        | ILMN_2963906 | ILMN_209347 | -5.69 | 0.0000 |
| <i>Mic2l1</i>        | ILMN_2663576 | ILMN_215787 | -5.73 | 0.0000 |
| <i>Pcdh7</i>         | ILMN_2881857 | ILMN_226390 | -5.82 | 0.0000 |
| <i>Alg3</i>          | ILMN_2744459 | ILMN_211821 | -5.82 | 0.0000 |
| <i>Kifap3</i>        | ILMN_2654532 | ILMN_215014 | -5.83 | 0.0000 |
| <i>Chst7</i>         | ILMN_1216374 | ILMN_211189 | -5.85 | 0.0000 |
| <i>Ngfb</i>          | ILMN_2660233 | ILMN_215493 | -5.90 | 0.0000 |
| <i>Abpg</i>          | ILMN_2696136 | ILMN_218461 | -5.97 | 0.0000 |
| <i>Olfml2a</i>       | ILMN_1232604 | ILMN_234057 | -5.97 | 0.0000 |



|                           |              |             |        |        |
|---------------------------|--------------|-------------|--------|--------|
| <i>Car6</i>               | ILMN_1257323 | ILMN_258206 | -6.05  | 0.0000 |
| <i>Klk1b5</i>             | ILMN_1224893 | ILMN_196768 | -6.07  | 0.0000 |
| <i>OTTMUSG00000007485</i> | ILMN_2881950 | ILMN_241785 | -6.07  | 0.0000 |
| <i>Grl1</i>               | ILMN_2727118 | ILMN_214278 | -6.07  | 0.0000 |
| <i>Mup5</i>               | ILMN_3079257 | ILMN_214274 | -6.28  | 0.0000 |
| <i>Spt1</i>               | ILMN_2845370 | ILMN_217293 | -6.29  | 0.0000 |
| <i>Sema6c</i>             | ILMN_2876749 | ILMN_234745 | -6.36  | 0.0000 |
| <i>Klk1b5</i>             | ILMN_2731191 | ILMN_196768 | -6.46  | 0.0000 |
| <i>Klk1b21</i>            | ILMN_2651099 | ILMN_196711 | -6.48  | 0.0000 |
| <i>Vps53</i>              | ILMN_1258453 | ILMN_213797 | -6.65  | 0.0000 |
| <i>Clec4b1</i>            | ILMN_2959372 | ILMN_196321 | -6.66  | 0.0002 |
| <i>Klk1b27</i>            | ILMN_1252131 | ILMN_196774 | -6.69  | 0.0000 |
| <i>Ngfb</i>               | ILMN_2937596 | ILMN_215493 | -6.70  | 0.0000 |
| <i>Klk1b11</i>            | ILMN_2632912 | ILMN_196710 | -6.74  | 0.0000 |
| <i>Rapsn</i>              | ILMN_2967654 | ILMN_211548 | -6.75  | 0.0000 |
| <i>Klk1b4</i>             | ILMN_1238736 | ILMN_199361 | -6.77  | 0.0000 |
| <i>Muc10</i>              | ILMN_2623234 | ILMN_212146 | -6.79  | 0.0000 |
| <i>Vps36</i>              | ILMN_1240149 | ILMN_252294 | -6.79  | 0.0000 |
| <i>Klk1b21</i>            | ILMN_2732087 | ILMN_196711 | -6.81  | 0.0000 |
| <i>Klk1b8</i>             | ILMN_1216962 | ILMN_212623 | -6.92  | 0.0000 |
| <i>Muc10</i>              | ILMN_1247393 | ILMN_212146 | -6.96  | 0.0000 |
| <i>Pip</i>                | ILMN_2621766 | ILMN_212014 | -7.02  | 0.0000 |
| <i>Klk1b9</i>             | ILMN_2784773 | ILMN_196709 | -7.05  | 0.0000 |
| <i>H1fx</i>               | ILMN_1247646 | ILMN_221878 | -7.08  | 0.0000 |
| <i>Snip1</i>              | ILMN_2974480 | ILMN_219094 | -7.38  | 0.0000 |
| <i>Klk1b16</i>            | ILMN_1259613 | ILMN_196767 | -7.40  | 0.0000 |
| <i>Klk1b9</i>             | ILMN_2723594 | ILMN_196709 | -7.55  | 0.0000 |
| <i>2610019A05Rik</i>      | ILMN_2731592 | ILMN_221150 | -7.64  | 0.0000 |
| <i>Swap70</i>             | ILMN_2752989 | ILMN_220815 | -7.70  | 0.0000 |
| <i>Klk1b27</i>            | ILMN_3009447 | ILMN_196774 | -7.74  | 0.0000 |
| <i>LOC100044256</i>       | ILMN_2703052 | ILMN_313374 | -7.82  | 0.0000 |
| <i>Abpa</i>               | ILMN_1249191 | ILMN_216701 | -7.83  | 0.0000 |
| <i>Lman1l</i>             | ILMN_3127595 | ILMN_214284 | -7.84  | 0.0000 |
| <i>Abpb</i>               | ILMN_2915893 | ILMN_250100 | -7.87  | 0.0000 |
| <i>Narfl</i>              | ILMN_1232240 | ILMN_215503 | -7.97  | 0.0000 |
| <i>Smgc</i>               | ILMN_2775962 | ILMN_244638 | -7.99  | 0.0000 |
| <i>Klk1b24</i>            | ILMN_2622463 | ILMN_196770 | -8.02  | 0.0000 |
| <i>Klk1b11</i>            | ILMN_2979432 | ILMN_196710 | -8.07  | 0.0000 |
| <i>Egfbp2</i>             | ILMN_2791241 | ILMN_196757 | -8.12  | 0.0000 |
| <i>Abpb</i>               | ILMN_2771109 | ILMN_315214 | -8.35  | 0.0000 |
| <i>Klk1b26</i>            | ILMN_1217308 | ILMN_196712 | -8.36  | 0.0000 |
| <i>Smgc</i>               | ILMN_2620853 | ILMN_210125 | -8.59  | 0.0000 |
| <i>Rev3l</i>              | ILMN_1236221 | ILMN_219245 | -8.59  | 0.0000 |
| <i>Klk1b22</i>            | ILMN_2946653 | ILMN_239601 | -8.91  | 0.0000 |
| <i>Smgc</i>               | ILMN_2602496 | ILMN_210125 | -9.17  | 0.0000 |
| <i>Klk1b4</i>             | ILMN_2697256 | ILMN_199361 | -9.20  | 0.0000 |
| <i>Dst</i>                | ILMN_1251692 | ILMN_211736 | -9.57  | 0.0000 |
| <i>Abpg</i>               | ILMN_2599449 | ILMN_209813 | -9.78  | 0.0000 |
| <i>Klk1</i>               | ILMN_2760199 | ILMN_196747 | -10.49 | 0.0000 |
| <i>Fkbp11</i>             | ILMN_1224635 | ILMN_210599 | -14.00 | 0.0000 |

---
