# Supplementary material for: Deconvolution of expression microarray data reveals 131I-induced responses otherwise undetected in thyroid tissue
Source: PubMed Central journal article supplement (PMC6042689; doi:10.1371/journal.pone.0197911), 2018-07-12
Supplement: pone.0197911.s006.pdf [file pone.0197911.s006.pdf]

**Supplemental Table 4. List of significantly regulated transcripts in deconvolved data for C-cells**

The log<sub>2</sub>-ratio threshold was set to 0.58 with a p-value threshold of 0.01.

Multiple test correction for FDR was performed using the Benjamini Hochberg method in NEXUS 3.0 (BioDiscovery; El Segundo, CA, USA).

The pool size for intensity based pooling was set to 200.

| <b>Gene Symbol</b>   | <b>Probe</b> | <b>Transcript</b> | <b>Log<sub>2</sub> ratio</b> | <b>adjusted p-value</b> |
|----------------------|--------------|-------------------|------------------------------|-------------------------|
| <i>Myoz2</i>         | ILMN_1234857 | ILMN_223119       | 14.27                        | 0.0000                  |
| <i>Tnnt3</i>         | ILMN_2469018 | ILMN_190311       | 11.50                        | 0.0000                  |
| <i>Atp2a1</i>        | ILMN_2666864 | ILMN_216061       | 10.55                        | 0.0000                  |
| <i>Tnnc2</i>         | ILMN_2882658 | ILMN_188936       | 10.34                        | 0.0000                  |
| <i>Dmwd</i>          | ILMN_2711355 | ILMN_214760       | 10.10                        | 0.0000                  |
| <i>Tpm2</i>          | ILMN_2482209 | ILMN_191790       | 9.73                         | 0.0000                  |
| <i>LOC100046608</i>  | ILMN_2706514 | ILMN_311207       | 9.71                         | 0.0000                  |
| <i>Bzw2</i>          | ILMN_2644587 | ILMN_214132       | 9.65                         | 0.0000                  |
| <i>Pvalb</i>         | ILMN_1218223 | ILMN_213948       | 9.54                         | 0.0000                  |
| <i>Vgll2</i>         | ILMN_2909248 | ILMN_185749       | 9.28                         | 0.0000                  |
| <i>Rai2</i>          | ILMN_1223520 | ILMN_214074       | 9.18                         | 0.0000                  |
| <i>Mybpc2</i>        | ILMN_2676012 | ILMN_242030       | 9.04                         | 0.0000                  |
| <i>Myom1</i>         | ILMN_2626442 | ILMN_241505       | 8.96                         | 0.0000                  |
| <i>Mlf1</i>          | ILMN_3112219 | ILMN_246637       | 8.96                         | 0.0000                  |
| <i>Nrap</i>          | ILMN_3061287 | ILMN_247151       | 8.91                         | 0.0000                  |
| <i>Myh2</i>          | ILMN_1219423 | ILMN_219104       | 8.82                         | 0.0000                  |
| <i>Eef1a2</i>        | ILMN_2666990 | ILMN_214177       | 8.70                         | 0.0000                  |
| <i>Pgam2</i>         | ILMN_2588815 | ILMN_208713       | 8.67                         | 0.0000                  |
| <i>Ptp4a3</i>        | ILMN_2655260 | ILMN_213418       | 8.64                         | 0.0000                  |
| <i>Myh4</i>          | ILMN_1241214 | ILMN_229231       | 8.61                         | 0.0000                  |
| <i>Myh1</i>          | ILMN_2865744 | ILMN_239496       | 8.43                         | 0.0000                  |
| <i>H19</i>           | ILMN_2906728 | ILMN_219881       | 8.34                         | 0.0000                  |
| <i>Gpc1</i>          | ILMN_2635784 | ILMN_244157       | 8.32                         | 0.0000                  |
| <i>Zadh1</i>         | ILMN_2476885 | ILMN_191185       | 8.17                         | 0.0000                  |
| <i>Ckmt2</i>         | ILMN_2698052 | ILMN_218610       | 8.10                         | 0.0000                  |
| <i>Nrap</i>          | ILMN_1235070 | ILMN_217102       | 8.00                         | 0.0000                  |
| <i>Eef1a2</i>        | ILMN_2971559 | ILMN_214177       | 7.99                         | 0.0000                  |
| <i>Gpr63</i>         | ILMN_2750800 | ILMN_222518       | 7.99                         | 0.0000                  |
| <i>5730593F17Rik</i> | ILMN_1224162 | ILMN_223419       | 7.96                         | 0.0000                  |
| <i>Actn2</i>         | ILMN_2797061 | ILMN_223487       | 7.89                         | 0.0000                  |
| <i>Arpp21</i>        | ILMN_1241866 | ILMN_217469       | 7.89                         | 0.0000                  |
| <i>Dbx1</i>          | ILMN_2963413 | ILMN_240000       | 7.84                         | 0.0029                  |
| <i>Yipf7</i>         | ILMN_1220086 | ILMN_216898       | 7.75                         | 0.0000                  |
| <i>Cbl</i>           | ILMN_2649011 | ILMN_214537       | 7.75                         | 0.0000                  |
| <i>Tmem120b</i>      | ILMN_2909283 | ILMN_251445       | 7.68                         | 0.0002                  |
| <i>Tmem157</i>       | ILMN_2742739 | ILMN_221964       | 7.60                         | 0.0000                  |
| <i>Mpv17</i>         | ILMN_3003242 | ILMN_199373       | 7.59                         | 0.0000                  |
| <i>Sfxn1</i>         | ILMN_2675569 | ILMN_216803       | 7.58                         | 0.0000                  |
| <i>Psmc4</i>         | ILMN_1228630 | ILMN_218193       | 7.52                         | 0.0000                  |
| <i>V1re7</i>         | ILMN_1255339 | ILMN_187541       | 7.50                         | 0.0000                  |
| <i>Scn4b</i>         | ILMN_2813547 | ILMN_255776       | 7.48                         | 0.0000                  |
| <i>Pdlim5</i>        | ILMN_3137570 | ILMN_235674       | 7.47                         | 0.0000                  |

|                      |              |             |      |        |
|----------------------|--------------|-------------|------|--------|
| <i>2310039E09Rik</i> | ILMN_2897214 | ILMN_211197 | 7.41 | 0.0000 |
| <i>Ntn2l</i>         | ILMN_1220826 | ILMN_210119 | 7.35 | 0.0000 |
| <i>Actn3</i>         | ILMN_3008110 | ILMN_219398 | 7.34 | 0.0000 |
| <i>Csrp3</i>         | ILMN_2789650 | ILMN_217987 | 7.34 | 0.0000 |
| <i>Kcnj12</i>        | ILMN_2695900 | ILMN_218442 | 7.20 | 0.0000 |
| <i>Ppp1r14c</i>      | ILMN_2632509 | ILMN_261317 | 7.16 | 0.0000 |
| <i>Csrp3</i>         | ILMN_2789651 | ILMN_217987 | 7.14 | 0.0002 |
| <i>Olfr1120</i>      | ILMN_2654348 | ILMN_214999 | 7.13 | 0.0003 |
| <i>Scgb3a2</i>       | ILMN_2835481 | ILMN_222722 | 7.08 | 0.0000 |
| <i>Atad1</i>         | ILMN_2639230 | ILMN_213641 | 7.07 | 0.0000 |
| <i>Tkt</i>           | ILMN_2780323 | ILMN_210657 | 7.04 | 0.0000 |
| <i>Actn3</i>         | ILMN_2747543 | ILMN_219398 | 7.03 | 0.0000 |
| <i>Csrp3</i>         | ILMN_2742068 | ILMN_217987 | 6.97 | 0.0000 |
| <i>Gclm</i>          | ILMN_1256354 | ILMN_219340 | 6.95 | 0.0000 |
| <i>Txlnb</i>         | ILMN_2886610 | ILMN_211914 | 6.93 | 0.0008 |
| <i>Olfr173</i>       | ILMN_2986948 | ILMN_243070 | 6.91 | 0.0003 |
| <i>Cd248</i>         | ILMN_2896843 | ILMN_216345 | 6.88 | 0.0000 |
| <i>Tmod4</i>         | ILMN_2438793 | ILMN_228148 | 6.81 | 0.0008 |
| <i>Svep1</i>         | ILMN_2691951 | ILMN_218126 | 6.80 | 0.0000 |
| <i>Ryr1</i>          | ILMN_2730425 | ILMN_226638 | 6.71 | 0.0001 |
| <i>Pknox2</i>        | ILMN_3135037 | ILMN_254436 | 6.70 | 0.0000 |
| <i>Gclc</i>          | ILMN_2608016 | ILMN_210671 | 6.70 | 0.0014 |
| <i>Alpk3</i>         | ILMN_3001417 | ILMN_209698 | 6.67 | 0.0000 |
| <i>Ryr1</i>          | ILMN_2733073 | ILMN_226638 | 6.65 | 0.0000 |
| <i>Lynx1</i>         | ILMN_1256369 | ILMN_218793 | 6.60 | 0.0000 |
| <i>LOC100045343</i>  | ILMN_2674281 | ILMN_331554 | 6.58 | 0.0014 |
| <i>Smpx</i>          | ILMN_2785679 | ILMN_208970 | 6.58 | 0.0040 |
| <i>Nrap</i>          | ILMN_3138732 | ILMN_247151 | 6.57 | 0.0005 |
| <i>Actn3</i>         | ILMN_2708303 | ILMN_219398 | 6.55 | 0.0001 |
| <i>Ryr1</i>          | ILMN_2842357 | ILMN_226638 | 6.53 | 0.0007 |
| <i>Dtna</i>          | ILMN_1221805 | ILMN_223037 | 6.50 | 0.0000 |
| <i>2310038H17Rik</i> | ILMN_2705570 | ILMN_219198 | 6.50 | 0.0000 |
| <i>Abra</i>          | ILMN_2732401 | ILMN_256787 | 6.46 | 0.0007 |
| <i>Gm216</i>         | ILMN_3038912 | ILMN_239455 | 6.44 | 0.0000 |
| <i>Ruvbl1</i>        | ILMN_1228999 | ILMN_216028 | 6.41 | 0.0000 |
| <i>Trim72</i>        | ILMN_2900484 | ILMN_252980 | 6.40 | 0.0000 |
| <i>Neurl</i>         | ILMN_2625940 | ILMN_212397 | 6.39 | 0.0002 |
| <i>9930111J21Rik</i> | ILMN_2685088 | ILMN_217224 | 6.38 | 0.0000 |
| <i>Olfr725</i>       | ILMN_2814107 | ILMN_201572 | 6.37 | 0.0046 |
| <i>Kirrel2</i>       | ILMN_2629246 | ILMN_210693 | 6.36 | 0.0001 |
| <i>Ndufs4</i>        | ILMN_1234521 | ILMN_212301 | 6.35 | 0.0000 |
| <i>Myot</i>          | ILMN_2444217 | ILMN_250811 | 6.32 | 0.0000 |
| <i>Tshz3</i>         | ILMN_1253593 | ILMN_194436 | 6.30 | 0.0008 |
| <i>Hspa1l</i>        | ILMN_2654682 | ILMN_215026 | 6.28 | 0.0000 |
| <i>Ywhae</i>         | ILMN_1220100 | ILMN_195181 | 6.27 | 0.0002 |
| <i>Lysmd2</i>        | ILMN_1239808 | ILMN_222488 | 6.27 | 0.0000 |
| <i>Mef2c</i>         | ILMN_1214950 | ILMN_235198 | 6.23 | 0.0000 |
| <i>Ovca2</i>         | ILMN_2724815 | ILMN_220648 | 6.22 | 0.0000 |
| <i>Fbxo32</i>        | ILMN_2873444 | ILMN_219973 | 6.16 | 0.0000 |
| <i>LOC100046163</i>  | ILMN_2672325 | ILMN_319247 | 6.15 | 0.0000 |

|                      |              |             |      |        |
|----------------------|--------------|-------------|------|--------|
| <i>Col3a1</i>        | ILMN_2683958 | ILMN_211697 | 6.14 | 0.0000 |
| <i>Olfr765</i>       | ILMN_2911183 | ILMN_201568 | 6.10 | 0.0000 |
| <i>Ampd1</i>         | ILMN_2971142 | ILMN_259430 | 6.06 | 0.0000 |
| <i>Sgca</i>          | ILMN_2938154 | ILMN_211934 | 6.06 | 0.0000 |
| <i>Mobkl1a</i>       | ILMN_2895536 | ILMN_229357 | 6.02 | 0.0002 |
| <i>Cbfb</i>          | ILMN_2671644 | ILMN_216489 | 6.00 | 0.0001 |
| <i>Schip1</i>        | ILMN_1244514 | ILMN_216237 | 5.98 | 0.0000 |
| <i>Pitx2</i>         | ILMN_3118071 | ILMN_237162 | 5.97 | 0.0087 |
| <i>Tmod1</i>         | ILMN_2977404 | ILMN_189256 | 5.96 | 0.0059 |
| <i>A2bp1</i>         | ILMN_1238309 | ILMN_216899 | 5.88 | 0.0005 |
| <i>Mtrr</i>          | ILMN_2742268 | ILMN_220536 | 5.83 | 0.0000 |
| <i>Gbl</i>           | ILMN_2906473 | ILMN_213816 | 5.81 | 0.0000 |
| <i>Cfl2</i>          | ILMN_1241871 | ILMN_217503 | 5.76 | 0.0000 |
| <i>Acbd3</i>         | ILMN_1235783 | ILMN_211268 | 5.75 | 0.0000 |
| <i>Tm7sf2</i>        | ILMN_1241333 | ILMN_226159 | 5.74 | 0.0007 |
| <i>Slc8a2</i>        | ILMN_2715429 | ILMN_219936 | 5.73 | 0.0005 |
| <i>Pfkm</i>          | ILMN_3004553 | ILMN_208909 | 5.72 | 0.0001 |
| <i>Pfkp</i>          | ILMN_2673233 | ILMN_226308 | 5.71 | 0.0000 |
| <i>2310002L09Rik</i> | ILMN_1214119 | ILMN_215549 | 5.70 | 0.0000 |
| <i>2310005N03Rik</i> | ILMN_2693258 | ILMN_218232 | 5.69 | 0.0038 |
| <i>LOC100046690</i>  | ILMN_1236869 | ILMN_312512 | 5.69 | 0.0000 |
| <i>BC061212</i>      | ILMN_3098894 | ILMN_238862 | 5.65 | 0.0019 |
| <i>2010107G23Rik</i> | ILMN_2803564 | ILMN_218820 | 5.65 | 0.0000 |
| <i>Gpd2</i>          | ILMN_1215797 | ILMN_214592 | 5.62 | 0.0001 |
| <i>Nrp1</i>          | ILMN_2669912 | ILMN_214296 | 5.60 | 0.0036 |
| <i>S3-12</i>         | ILMN_2588249 | ILMN_208656 | 5.59 | 0.0000 |
| <i>1810027O10Rik</i> | ILMN_2875089 | ILMN_261137 | 5.58 | 0.0000 |
| <i>Npcd</i>          | ILMN_3147433 | ILMN_247952 | 5.58 | 0.0018 |
| <i>Mlf1</i>          | ILMN_2658425 | ILMN_215347 | 5.58 | 0.0000 |
| <i>Slc25a3</i>       | ILMN_2751046 | ILMN_222536 | 5.57 | 0.0004 |
| <i>Dysfip1</i>       | ILMN_2613038 | ILMN_238591 | 5.55 | 0.0000 |
| <i>Opn1mw</i>        | ILMN_2706948 | ILMN_219296 | 5.53 | 0.0000 |
| <i>Wfdc1</i>         | ILMN_2466164 | ILMN_189984 | 5.53 | 0.0001 |
| <i>Loxl1</i>         | ILMN_1255871 | ILMN_245559 | 5.51 | 0.0000 |
| <i>Olfr168</i>       | ILMN_1241782 | ILMN_214436 | 5.47 | 0.0061 |
| <i>Slc41a3</i>       | ILMN_2647533 | ILMN_250318 | 5.47 | 0.0000 |
| <i>Dlk1</i>          | ILMN_1244618 | ILMN_257636 | 5.46 | 0.0003 |
| <i>Tpm2</i>          | ILMN_2787172 | ILMN_191790 | 5.45 | 0.0000 |
| <i>Pdha1</i>         | ILMN_2679851 | ILMN_217171 | 5.44 | 0.0000 |
| <i>Dmn</i>           | ILMN_2636266 | ILMN_250370 | 5.43 | 0.0012 |
| <i>Tmem38a</i>       | ILMN_1245673 | ILMN_212903 | 5.43 | 0.0087 |
| <i>Heatr3</i>        | ILMN_3007728 | ILMN_208905 | 5.43 | 0.0001 |
| <i>Igsf1</i>         | ILMN_2660505 | ILMN_215516 | 5.43 | 0.0000 |
| <i>Cpsf6</i>         | ILMN_3042324 | ILMN_246878 | 5.42 | 0.0005 |
| <i>Mybbp1a</i>       | ILMN_1255110 | ILMN_228300 | 5.41 | 0.0021 |
| <i>Fsd2</i>          | ILMN_1242790 | ILMN_211390 | 5.41 | 0.0000 |
| <i>Zfp617</i>        | ILMN_2503418 | ILMN_190309 | 5.38 | 0.0000 |
| <i>Ndufa13</i>       | ILMN_2649937 | ILMN_233195 | 5.37 | 0.0000 |
| <i>Chek1</i>         | ILMN_3009652 | ILMN_212847 | 5.36 | 0.0000 |
| <i>Myom1</i>         | ILMN_2815138 | ILMN_241505 | 5.34 | 0.0000 |

|                      |              |             |      |        |
|----------------------|--------------|-------------|------|--------|
| <i>Cxcr5</i>         | ILMN_2990502 | ILMN_214380 | 5.33 | 0.0003 |
| <i>Sdc2</i>          | ILMN_2619983 | ILMN_211837 | 5.30 | 0.0000 |
| <i>Olfr1289</i>      | ILMN_2866545 | ILMN_222169 | 5.28 | 0.0015 |
| <i>Trim63</i>        | ILMN_3161060 | ILMN_238506 | 5.28 | 0.0000 |
| <i>Usp13</i>         | ILMN_2422325 | ILMN_237434 | 5.27 | 0.0021 |
| <i>2010305A19Rik</i> | ILMN_2869524 | ILMN_251057 | 5.27 | 0.0000 |
| <i>Mex3a</i>         | ILMN_3072957 | ILMN_249418 | 5.24 | 0.0000 |
| <i>Phka1</i>         | ILMN_1230564 | ILMN_219720 | 5.23 | 0.0092 |
| <i>Myl2</i>          | ILMN_1260428 | ILMN_234915 | 5.20 | 0.0000 |
| <i>Lce1i</i>         | ILMN_1220831 | ILMN_214313 | 5.19 | 0.0021 |
| <i>Rdh20</i>         | ILMN_2598510 | ILMN_209717 | 5.15 | 0.0003 |
| <i>Ndufab1</i>       | ILMN_2732281 | ILMN_236862 | 5.15 | 0.0074 |
| <i>St3gal2</i>       | ILMN_1256849 | ILMN_223112 | 5.14 | 0.0000 |
| <i>Smad3</i>         | ILMN_2938893 | ILMN_227724 | 5.13 | 0.0002 |
| <i>Pxn</i>           | ILMN_1225102 | ILMN_232736 | 5.13 | 0.0000 |
| <i>Fgf3</i>          | ILMN_1231254 | ILMN_221278 | 5.13 | 0.0024 |
| <i>4931440B09Rik</i> | ILMN_2650180 | ILMN_231392 | 5.11 | 0.0007 |
| <i>Fdps</i>          | ILMN_1225730 | ILMN_260757 | 5.09 | 0.0024 |
| <i>LOC100038984</i>  | ILMN_2606189 | ILMN_311308 | 5.08 | 0.0024 |
| <i>D12Erd551e</i>    | ILMN_1240131 | ILMN_211409 | 4.99 | 0.0010 |
| <i>Letm1</i>         | ILMN_1248887 | ILMN_211496 | 4.97 | 0.0000 |
| <i>Zscan2</i>        | ILMN_2832322 | ILMN_191669 | 4.96 | 0.0000 |
| <i>Ppp2r5d</i>       | ILMN_2596907 | ILMN_209554 | 4.95 | 0.0000 |
| <i>Mospd1</i>        | ILMN_3006931 | ILMN_220553 | 4.95 | 0.0000 |
| <i>Dppa1</i>         | ILMN_2656079 | ILMN_215149 | 4.93 | 0.0016 |
| <i>Ss18l1</i>        | ILMN_2991263 | ILMN_220742 | 4.90 | 0.0004 |
| <i>Chrna1</i>        | ILMN_1245221 | ILMN_209616 | 4.90 | 0.0000 |
| <i>Pfkm</i>          | ILMN_1252214 | ILMN_208909 | 4.89 | 0.0003 |
| <i>Lrrc57</i>        | ILMN_2898944 | ILMN_215482 | 4.88 | 0.0000 |
| <i>Zscan12</i>       | ILMN_1246450 | ILMN_187306 | 4.87 | 0.0000 |
| <i>LOC545056</i>     | ILMN_2944843 | ILMN_241992 | 4.86 | 0.0000 |
| <i>Nr4a3</i>         | ILMN_1257794 | ILMN_216068 | 4.86 | 0.0025 |
| <i>Tppp3</i>         | ILMN_2655929 | ILMN_215136 | 4.86 | 0.0001 |
| <i>Dclre1b</i>       | ILMN_2638404 | ILMN_224631 | 4.83 | 0.0026 |
| <i>Igfbp5</i>        | ILMN_2964324 | ILMN_238078 | 4.82 | 0.0037 |
| <i>Fbxl14</i>        | ILMN_2972232 | ILMN_227130 | 4.82 | 0.0000 |
| <i>Cacna2d1</i>      | ILMN_2752030 | ILMN_222592 | 4.78 | 0.0000 |
| <i>Tpra40</i>        | ILMN_2440066 | ILMN_186972 | 4.77 | 0.0012 |
| <i>Sphk1</i>         | ILMN_2732199 | ILMN_221190 | 4.77 | 0.0022 |
| <i>Dedd</i>          | ILMN_2857679 | ILMN_214171 | 4.74 | 0.0043 |
| <i>Mustn1</i>        | ILMN_2658461 | ILMN_215350 | 4.74 | 0.0000 |
| <i>Scoc</i>          | ILMN_1216231 | ILMN_251319 | 4.74 | 0.0013 |
| <i>Rab28</i>         | ILMN_2990864 | ILMN_254780 | 4.73 | 0.0001 |
| <i>Gbp5</i>          | ILMN_1244866 | ILMN_233457 | 4.72 | 0.0001 |
| <i>Gpr152</i>        | ILMN_1240344 | ILMN_222973 | 4.70 | 0.0008 |
| <i>Pfn2</i>          | ILMN_1260064 | ILMN_210891 | 4.68 | 0.0013 |
| <i>Frat2</i>         | ILMN_2824002 | ILMN_213946 | 4.68 | 0.0004 |
| <i>Itgb1bp2</i>      | ILMN_2853166 | ILMN_214673 | 4.67 | 0.0010 |
| <i>Mb</i>            | ILMN_1234662 | ILMN_210416 | 4.65 | 0.0000 |
| <i>Pkia</i>          | ILMN_2674122 | ILMN_216692 | 4.64 | 0.0000 |

|                      |              |             |      |        |
|----------------------|--------------|-------------|------|--------|
| <i>Mfn1</i>          | ILMN_2719296 | ILMN_220222 | 4.64 | 0.0010 |
| <i>2900010J23Rik</i> | ILMN_2733835 | ILMN_221314 | 4.63 | 0.0003 |
| <i>D630042F21Rik</i> | ILMN_3118298 | ILMN_255520 | 4.63 | 0.0000 |
| <i>Pdlim3</i>        | ILMN_2885990 | ILMN_213954 | 4.62 | 0.0000 |
| <i>Ddx19b</i>        | ILMN_2688135 | ILMN_222048 | 4.62 | 0.0000 |
| <i>Akr1c14</i>       | ILMN_2921215 | ILMN_215131 | 4.61 | 0.0007 |
| <i>Trpc5</i>         | ILMN_2433320 | ILMN_186181 | 4.59 | 0.0020 |
| <i>Fhl1</i>          | ILMN_3117381 | ILMN_245416 | 4.59 | 0.0000 |
| <i>Hspb3</i>         | ILMN_2748205 | ILMN_222338 | 4.58 | 0.0032 |
| <i>Tcf1</i>          | ILMN_2960005 | ILMN_259806 | 4.58 | 0.0000 |
| <i>Tmem198</i>       | ILMN_3162551 | ILMN_218012 | 4.58 | 0.0000 |
| <i>Pld2</i>          | ILMN_2683094 | ILMN_217427 | 4.54 | 0.0000 |
| <i>Col11a1</i>       | ILMN_1217703 | ILMN_210481 | 4.52 | 0.0000 |
| <i>Mmp27</i>         | ILMN_2982829 | ILMN_250290 | 4.52 | 0.0021 |
| <i>Olfr141</i>       | ILMN_2611205 | ILMN_210975 | 4.49 | 0.0002 |
| <i>C330027C09Rik</i> | ILMN_2709155 | ILMN_214430 | 4.48 | 0.0001 |
| <i>Cmya1</i>         | ILMN_1231765 | ILMN_228097 | 4.48 | 0.0000 |
| <i>Dusp13</i>        | ILMN_2719386 | ILMN_220225 | 4.47 | 0.0003 |
| <i>Gsdma2</i>        | ILMN_2612219 | ILMN_211073 | 4.47 | 0.0000 |
| <i>Spib</i>          | ILMN_2933168 | ILMN_258029 | 4.45 | 0.0014 |
| <i>BC016579</i>      | ILMN_2681156 | ILMN_260155 | 4.45 | 0.0000 |
| <i>Dhrs7</i>         | ILMN_2747820 | ILMN_213586 | 4.45 | 0.0001 |
| <i>Stk35</i>         | ILMN_3155190 | ILMN_220535 | 4.43 | 0.0087 |
| <i>A930009M04Rik</i> | ILMN_2734855 | ILMN_189339 | 4.42 | 0.0000 |
| <i>Cacng1</i>        | ILMN_2609549 | ILMN_210820 | 4.41 | 0.0000 |
| <i>Pde4dip</i>       | ILMN_3064283 | ILMN_228537 | 4.40 | 0.0000 |
| <i>Rpgr</i>          | ILMN_2703093 | ILMN_219012 | 4.39 | 0.0000 |
| <i>Rbj</i>           | ILMN_2618831 | ILMN_211715 | 4.39 | 0.0002 |
| <i>Fhl1</i>          | ILMN_2713285 | ILMN_240873 | 4.39 | 0.0023 |
| <i>Psm11</i>         | ILMN_1214057 | ILMN_213316 | 4.37 | 0.0000 |
| <i>Rab11a</i>        | ILMN_1230413 | ILMN_247934 | 4.36 | 0.0008 |
| <i>Olfr961</i>       | ILMN_2990768 | ILMN_217807 | 4.36 | 0.0086 |
| <i>Olfr1512</i>      | ILMN_2611621 | ILMN_211017 | 4.36 | 0.0005 |
| <i>EG317677</i>      | ILMN_2639513 | ILMN_213670 | 4.35 | 0.0005 |
| <i>C530044N13Rik</i> | ILMN_1255438 | ILMN_242932 | 4.34 | 0.0002 |
| <i>As3mt</i>         | ILMN_2707198 | ILMN_216722 | 4.33 | 0.0100 |
| <i>2900026A02Rik</i> | ILMN_1251935 | ILMN_243658 | 4.32 | 0.0000 |
| <i>Clps</i>          | ILMN_1246265 | ILMN_220484 | 4.31 | 0.0000 |
| <i>Adssl1</i>        | ILMN_2711688 | ILMN_210075 | 4.31 | 0.0005 |
| <i>Eln</i>           | ILMN_2697304 | ILMN_218560 | 4.29 | 0.0000 |
| <i>Tex12</i>         | ILMN_2719637 | ILMN_220245 | 4.29 | 0.0041 |
| <i>Kif1b</i>         | ILMN_3034877 | ILMN_207470 | 4.28 | 0.0001 |
| <i>Lrrn1</i>         | ILMN_2759736 | ILMN_223132 | 4.25 | 0.0005 |
| <i>Hoxc5</i>         | ILMN_1230286 | ILMN_216543 | 4.25 | 0.0000 |
| <i>Dedd</i>          | ILMN_2645074 | ILMN_214171 | 4.24 | 0.0057 |
| <i>Hspb7</i>         | ILMN_2677662 | ILMN_216975 | 4.23 | 0.0002 |
| <i>Asb2</i>          | ILMN_2765759 | ILMN_223558 | 4.22 | 0.0002 |
| <i>Ldlrad2</i>       | ILMN_2922672 | ILMN_256100 | 4.22 | 0.0058 |
| <i>Klhl31</i>        | ILMN_1247118 | ILMN_216835 | 4.22 | 0.0000 |
| <i>Ppp1r3c</i>       | ILMN_2667091 | ILMN_216078 | 4.22 | 0.0021 |

|                      |              |             |      |        |
|----------------------|--------------|-------------|------|--------|
| <i>Mb</i>            | ILMN_2954987 | ILMN_210416 | 4.21 | 0.0039 |
| <i>Serpinh1</i>      | ILMN_2822850 | ILMN_260096 | 4.20 | 0.0000 |
| <i>Cxcl12</i>        | ILMN_3078973 | ILMN_251788 | 4.19 | 0.0005 |
| <i>Tnfaip8l1</i>     | ILMN_2780552 | ILMN_220689 | 4.18 | 0.0015 |
| <i>Adcyap1r1</i>     | ILMN_2717037 | ILMN_188920 | 4.18 | 0.0001 |
| <i>1110057K04Rik</i> | ILMN_2756686 | ILMN_213087 | 4.17 | 0.0015 |
| <i>Casc4</i>         | ILMN_2614203 | ILMN_211277 | 4.17 | 0.0044 |
| <i>Pdcd6</i>         | ILMN_2681832 | ILMN_217320 | 4.17 | 0.0001 |
| <i>Ttc16</i>         | ILMN_2471317 | ILMN_190569 | 4.17 | 0.0074 |
| <i>Lsr</i>           | ILMN_2716185 | ILMN_218740 | 4.17 | 0.0070 |
| <i>Ptprs</i>         | ILMN_2688930 | ILMN_212655 | 4.15 | 0.0030 |
| <i>Il7r</i>          | ILMN_2975500 | ILMN_215453 | 4.15 | 0.0000 |
| <i>Prrx1</i>         | ILMN_3057018 | ILMN_252720 | 4.15 | 0.0000 |
| <i>BC050196</i>      | ILMN_1227083 | ILMN_221397 | 4.14 | 0.0001 |
| <i>Zfp112</i>        | ILMN_1221408 | ILMN_185070 | 4.13 | 0.0052 |
| <i>Sh3rf2</i>        | ILMN_2942551 | ILMN_213769 | 4.13 | 0.0007 |
| <i>Aqp11</i>         | ILMN_1225901 | ILMN_216379 | 4.12 | 0.0017 |
| <i>Pkd2l1</i>        | ILMN_2731331 | ILMN_221125 | 4.11 | 0.0044 |
| <i>LOC433801</i>     | ILMN_3023451 | ILMN_260633 | 4.11 | 0.0021 |
| <i>4921504E06Rik</i> | ILMN_2691910 | ILMN_226880 | 4.09 | 0.0000 |
| <i>Spred2</i>        | ILMN_2590010 | ILMN_208837 | 4.08 | 0.0023 |
| <i>2900073G15Rik</i> | ILMN_2682046 | ILMN_217335 | 4.08 | 0.0006 |
| <i>Tmem92</i>        | ILMN_2866742 | ILMN_257054 | 4.07 | 0.0025 |
| <i>Rcbtb2</i>        | ILMN_2812084 | ILMN_222802 | 4.06 | 0.0048 |
| <i>Glyat</i>         | ILMN_2697749 | ILMN_232014 | 4.03 | 0.0005 |
| <i>Plxnd1</i>        | ILMN_3162354 | ILMN_260028 | 4.00 | 0.0000 |
| <i>Trpm3</i>         | ILMN_3025252 | ILMN_239137 | 3.97 | 0.0008 |
| <i>Rpap1</i>         | ILMN_2602151 | ILMN_210094 | 3.97 | 0.0000 |
| <i>AU021092</i>      | ILMN_2825905 | ILMN_234071 | 3.97 | 0.0001 |
| <i>Cwf19l2</i>       | ILMN_2860135 | ILMN_213168 | 3.97 | 0.0044 |
| <i>Ptp4a2</i>        | ILMN_2647282 | ILMN_210989 | 3.95 | 0.0001 |
| <i>Asb10</i>         | ILMN_2919777 | ILMN_210145 | 3.95 | 0.0017 |
| <i>Stx4a</i>         | ILMN_2822053 | ILMN_233733 | 3.93 | 0.0012 |
| <i>Npy5r</i>         | ILMN_3002189 | ILMN_237214 | 3.93 | 0.0013 |
| <i>Fbxo31</i>        | ILMN_1252057 | ILMN_217743 | 3.93 | 0.0003 |
| <i>Iars</i>          | ILMN_1224044 | ILMN_212043 | 3.93 | 0.0002 |
| <i>EG546150</i>      | ILMN_2995474 | ILMN_256320 | 3.92 | 0.0003 |
| <i>Usp6nl</i>        | ILMN_1254995 | ILMN_184522 | 3.92 | 0.0020 |
| <i>Wars2</i>         | ILMN_2888110 | ILMN_187788 | 3.91 | 0.0095 |
| <i>Adamts19</i>      | ILMN_1227352 | ILMN_222462 | 3.90 | 0.0031 |
| <i>Tpi1</i>          | ILMN_2932359 | ILMN_186788 | 3.89 | 0.0004 |
| <i>Zfp93</i>         | ILMN_1232697 | ILMN_190304 | 3.88 | 0.0001 |
| <i>Tm4sf4</i>        | ILMN_2479370 | ILMN_191474 | 3.88 | 0.0001 |
| <i>Dgke</i>          | ILMN_2658108 | ILMN_248261 | 3.87 | 0.0027 |
| <i>Fbxo32</i>        | ILMN_2752994 | ILMN_219973 | 3.87 | 0.0001 |
| <i>Timm9</i>         | ILMN_1217794 | ILMN_249971 | 3.86 | 0.0000 |
| <i>Atp1b4</i>        | ILMN_2768612 | ILMN_223752 | 3.85 | 0.0019 |
| <i>Tpi1</i>          | ILMN_1230137 | ILMN_186788 | 3.85 | 0.0000 |
| <i>Gm106</i>         | ILMN_2802928 | ILMN_250562 | 3.84 | 0.0004 |
| <i>Pltp</i>          | ILMN_2589401 | ILMN_208776 | 3.84 | 0.0005 |

|                      |              |             |      |        |
|----------------------|--------------|-------------|------|--------|
| <i>Smpx</i>          | ILMN_2591308 | ILMN_208970 | 3.82 | 0.0002 |
| <i>Prps1</i>         | ILMN_1230518 | ILMN_210269 | 3.81 | 0.0024 |
| <i>Gtf2a1</i>        | ILMN_1244651 | ILMN_211195 | 3.81 | 0.0011 |
| <i>Ankrd23</i>       | ILMN_2741117 | ILMN_221842 | 3.81 | 0.0059 |
| <i>Spg7</i>          | ILMN_2742420 | ILMN_201532 | 3.81 | 0.0008 |
| <i>Klhl7</i>         | ILMN_2660864 | ILMN_215548 | 3.76 | 0.0015 |
| <i>Acbd4</i>         | ILMN_3071515 | ILMN_217938 | 3.75 | 0.0002 |
| <i>Ubfd1</i>         | ILMN_2777104 | ILMN_256119 | 3.74 | 0.0025 |
| <i>LOC100044222</i>  | ILMN_1223207 | ILMN_314340 | 3.73 | 0.0004 |
| <i>Fgf12</i>         | ILMN_1221164 | ILMN_220239 | 3.73 | 0.0003 |
| <i>Pex11a</i>        | ILMN_1249264 | ILMN_251549 | 3.73 | 0.0048 |
| <i>Olfr1234</i>      | ILMN_1229384 | ILMN_214550 | 3.72 | 0.0000 |
| <i>Tubb3</i>         | ILMN_1252657 | ILMN_190058 | 3.72 | 0.0010 |
| <i>Hoxa1</i>         | ILMN_2603334 | ILMN_210214 | 3.72 | 0.0002 |
| <i>Gdf9</i>          | ILMN_1225090 | ILMN_214936 | 3.72 | 0.0074 |
| <i>Josd2</i>         | ILMN_2667614 | ILMN_216123 | 3.69 | 0.0044 |
| <i>Rmnd5b</i>        | ILMN_2918663 | ILMN_217949 | 3.69 | 0.0050 |
| <i>Dhcr24</i>        | ILMN_2747031 | ILMN_222259 | 3.69 | 0.0033 |
| <i>Ccnl2</i>         | ILMN_2601488 | ILMN_254859 | 3.68 | 0.0011 |
| <i>Gbl</i>           | ILMN_2906471 | ILMN_213816 | 3.67 | 0.0008 |
| <i>Tmem160</i>       | ILMN_2914295 | ILMN_225101 | 3.66 | 0.0003 |
| <i>Capza1</i>        | ILMN_2921526 | ILMN_223703 | 3.65 | 0.0014 |
| <i>Ube2a</i>         | ILMN_2476804 | ILMN_191175 | 3.64 | 0.0002 |
| <i>Tnnt1</i>         | ILMN_2460136 | ILMN_189308 | 3.64 | 0.0012 |
| <i>Snta1</i>         | ILMN_2734142 | ILMN_221335 | 3.64 | 0.0090 |
| <i>Slc2a5</i>        | ILMN_1218769 | ILMN_221068 | 3.64 | 0.0003 |
| <i>Sqrdl</i>         | ILMN_1247947 | ILMN_223305 | 3.64 | 0.0000 |
| <i>Mtrf1</i>         | ILMN_1230693 | ILMN_199371 | 3.64 | 0.0004 |
| <i>Ube2f</i>         | ILMN_2614522 | ILMN_251929 | 3.61 | 0.0021 |
| <i>A930008G19Rik</i> | ILMN_2710429 | ILMN_219556 | 3.61 | 0.0068 |
| <i>Uros</i>          | ILMN_2452383 | ILMN_188403 | 3.61 | 0.0057 |
| <i>2900010M23Rik</i> | ILMN_2877367 | ILMN_212351 | 3.61 | 0.0008 |
| <i>E4f1</i>          | ILMN_2650893 | ILMN_214697 | 3.60 | 0.0011 |
| <i>Prkcdbp</i>       | ILMN_2956942 | ILMN_214335 | 3.60 | 0.0002 |
| <i>Crip3</i>         | ILMN_3104529 | ILMN_234559 | 3.60 | 0.0001 |
| <i>Cyp2c67</i>       | ILMN_3074610 | ILMN_231858 | 3.59 | 0.0002 |
| <i>Ncdn</i>          | ILMN_2864497 | ILMN_215866 | 3.59 | 0.0004 |
| <i>Slc44a2</i>       | ILMN_2599719 | ILMN_209839 | 3.59 | 0.0068 |
| <i>Hoxa13</i>        | ILMN_1237317 | ILMN_213519 | 3.57 | 0.0003 |
| <i>Erg</i>           | ILMN_1260248 | ILMN_213964 | 3.56 | 0.0001 |
| <i>Srpk3</i>         | ILMN_2684515 | ILMN_217542 | 3.56 | 0.0014 |
| <i>Mlxip</i>         | ILMN_3139380 | ILMN_226707 | 3.56 | 0.0065 |
| <i>Nox4</i>          | ILMN_2698499 | ILMN_218644 | 3.55 | 0.0001 |
| <i>Prrx1</i>         | ILMN_2678094 | ILMN_252720 | 3.54 | 0.0076 |
| <i>Kti12</i>         | ILMN_2599412 | ILMN_209809 | 3.53 | 0.0002 |
| <i>Mbip</i>          | ILMN_1217143 | ILMN_216427 | 3.53 | 0.0013 |
| <i>Api5</i>          | ILMN_2705276 | ILMN_219743 | 3.52 | 0.0081 |
| <i>CN716893</i>      | ILMN_3039183 | ILMN_231406 | 3.50 | 0.0027 |
| <i>Gipc1</i>         | ILMN_2594419 | ILMN_209294 | 3.50 | 0.0003 |
| <i>Hmox1</i>         | ILMN_2788073 | ILMN_220840 | 3.50 | 0.0067 |

|                      |              |             |      |        |
|----------------------|--------------|-------------|------|--------|
| <i>Olfr494</i>       | ILMN_2782683 | ILMN_199408 | 3.50 | 0.0055 |
| <i>BC057627</i>      | ILMN_2977903 | ILMN_260182 | 3.49 | 0.0009 |
| <i>Wars2</i>         | ILMN_1213053 | ILMN_187788 | 3.48 | 0.0010 |
| <i>Dtna</i>          | ILMN_2724339 | ILMN_212398 | 3.47 | 0.0006 |
| <i>Adam3</i>         | ILMN_2772470 | ILMN_240204 | 3.47 | 0.0002 |
| <i>Trip12</i>        | ILMN_2504698 | ILMN_187207 | 3.46 | 0.0053 |
| <i>Csnk1a1</i>       | ILMN_1254710 | ILMN_223144 | 3.46 | 0.0053 |
| <i>Mare</i>          | ILMN_2717209 | ILMN_248390 | 3.46 | 0.0023 |
| <i>Ntrk3</i>         | ILMN_2632337 | ILMN_209768 | 3.43 | 0.0020 |
| <i>Cep27</i>         | ILMN_2630468 | ILMN_212801 | 3.41 | 0.0010 |
| <i>Trak1</i>         | ILMN_2937122 | ILMN_252788 | 3.41 | 0.0021 |
| <i>Sprr2f</i>        | ILMN_2695944 | ILMN_218446 | 3.40 | 0.0086 |
| <i>Pogz</i>          | ILMN_2857204 | ILMN_229041 | 3.39 | 0.0010 |
| <i>Nod2</i>          | ILMN_2702208 | ILMN_249891 | 3.39 | 0.0058 |
| <i>Jam2</i>          | ILMN_2592881 | ILMN_208960 | 3.38 | 0.0069 |
| <i>Pqlc2</i>         | ILMN_2725548 | ILMN_229604 | 3.38 | 0.0016 |
| <i>Ergic1</i>        | ILMN_2745433 | ILMN_222155 | 3.38 | 0.0002 |
| <i>Ndrp2</i>         | ILMN_3001650 | ILMN_244033 | 3.36 | 0.0002 |
| <i>Cdyl</i>          | ILMN_2647931 | ILMN_245690 | 3.32 | 0.0029 |
| <i>Acy1l2</i>        | ILMN_3160507 | ILMN_262070 | 3.31 | 0.0027 |
| <i>Ddx52</i>         | ILMN_2725504 | ILMN_220701 | 3.27 | 0.0088 |
| <i>P2ry2</i>         | ILMN_2872106 | ILMN_217971 | 3.25 | 0.0019 |
| <i>Ipo5</i>          | ILMN_2764995 | ILMN_223513 | 3.25 | 0.0083 |
| <i>Clip4</i>         | ILMN_2606470 | ILMN_249105 | 3.24 | 0.0057 |
| <i>Fsd2</i>          | ILMN_1215238 | ILMN_211390 | 3.23 | 0.0038 |
| <i>Fbxo42</i>        | ILMN_2781835 | ILMN_215247 | 3.22 | 0.0072 |
| <i>Narfl</i>         | ILMN_1232240 | ILMN_215503 | 3.22 | 0.0009 |
| <i>Kbtbd2</i>        | ILMN_2824593 | ILMN_215005 | 3.21 | 0.0076 |
| <i>Atp10d</i>        | ILMN_1235196 | ILMN_210812 | 3.20 | 0.0011 |
| <i>Cyp3a44</i>       | ILMN_1247769 | ILMN_219298 | 3.19 | 0.0072 |
| <i>Rab20</i>         | ILMN_2764968 | ILMN_223510 | 3.19 | 0.0007 |
| <i>Baz2a</i>         | ILMN_2652385 | ILMN_245530 | 3.18 | 0.0090 |
| <i>Fbxo40</i>        | ILMN_3049851 | ILMN_259819 | 3.16 | 0.0005 |
| <i>Ift57</i>         | ILMN_2646089 | ILMN_238013 | 3.16 | 0.0080 |
| <i>Sgk3</i>          | ILMN_2665364 | ILMN_213787 | 3.10 | 0.0004 |
| <i>Minpp1</i>        | ILMN_2703702 | ILMN_210498 | 3.05 | 0.0058 |
| <i>Ttc35</i>         | ILMN_2814431 | ILMN_223548 | 3.04 | 0.0023 |
| <i>Lrtm2</i>         | ILMN_2735391 | ILMN_221423 | 3.01 | 0.0014 |
| <i>Ppp2r5d</i>       | ILMN_2608394 | ILMN_209554 | 2.98 | 0.0010 |
| <i>Pwwp2b</i>        | ILMN_2833781 | ILMN_228600 | 2.92 | 0.0078 |
| <i>Olfr638</i>       | ILMN_2633907 | ILMN_213123 | 2.91 | 0.0003 |
| <i>Olfr1093</i>      | ILMN_2695437 | ILMN_218407 | 2.86 | 0.0038 |
| <i>Hnrpd</i>         | ILMN_2771260 | ILMN_242829 | 2.83 | 0.0006 |
| <i>Chia</i>          | ILMN_2955940 | ILMN_208632 | 2.83 | 0.0008 |
| <i>6530421E24Rik</i> | ILMN_2764974 | ILMN_223511 | 2.82 | 0.0019 |
| <i>Klhdc1</i>        | ILMN_2649635 | ILMN_214591 | 2.82 | 0.0071 |
| <i>Dr1</i>           | ILMN_2728290 | ILMN_220893 | 2.82 | 0.0000 |
| <i>Ntrk2</i>         | ILMN_3061460 | ILMN_259664 | 2.80 | 0.0046 |
| <i>Abpe</i>          | ILMN_1214113 | ILMN_249395 | 2.80 | 0.0063 |
| <i>1810030N24Rik</i> | ILMN_1221983 | ILMN_241295 | 2.77 | 0.0004 |



|                      |              |             |       |        |
|----------------------|--------------|-------------|-------|--------|
| <i>Avpr2</i>         | ILMN_2604189 | ILMN_210296 | 2.70  | 0.0055 |
| <i>Tfpt</i>          | ILMN_1222401 | ILMN_212710 | 2.70  | 0.0080 |
| <i>Spint4</i>        | ILMN_1240354 | ILMN_223595 | 2.65  | 0.0024 |
| <i>Serbp1</i>        | ILMN_2931900 | ILMN_215043 | 2.64  | 0.0094 |
| <i>Efna2</i>         | ILMN_2647949 | ILMN_214429 | 2.64  | 0.0057 |
| <i>Sell</i>          | ILMN_3009860 | ILMN_214504 | 2.53  | 0.0047 |
| <i>Tnfrsf1b</i>      | ILMN_2486186 | ILMN_189490 | 2.52  | 0.0003 |
| <i>Tlr4</i>          | ILMN_2690004 | ILMN_217521 | 2.48  | 0.0038 |
| <i>Bccip</i>         | ILMN_2759920 | ILMN_220167 | 2.45  | 0.0049 |
| <i>Slc12a1</i>       | ILMN_2746614 | ILMN_213108 | 2.44  | 0.0069 |
| <i>Olfr830</i>       | ILMN_2715382 | ILMN_219932 | 2.37  | 0.0025 |
| <i>Olfr1245</i>      | ILMN_2608693 | ILMN_210742 | 2.36  | 0.0094 |
| <i>Muc1</i>          | ILMN_1231229 | ILMN_208888 | 2.32  | 0.0003 |
| <i>Slc39a4</i>       | ILMN_1226293 | ILMN_223530 | -2.28 | 0.0018 |
| <i>Msln</i>          | ILMN_1231379 | ILMN_211608 | -2.32 | 0.0074 |
| <i>Plch2</i>         | ILMN_2925433 | ILMN_217607 | -2.49 | 0.0088 |
| <i>Yod1</i>          | ILMN_2595026 | ILMN_209354 | -2.50 | 0.0091 |
| <i>Cd74</i>          | ILMN_3089584 | ILMN_214824 | -2.63 | 0.0045 |
| <i>Gsta2</i>         | ILMN_1248849 | ILMN_196593 | -2.67 | 0.0038 |
| <i>Ropn1</i>         | ILMN_1218144 | ILMN_212523 | -2.69 | 0.0012 |
| <i>Olfr161</i>       | ILMN_1238823 | ILMN_213259 | -2.69 | 0.0045 |
| <i>Mfsd1</i>         | ILMN_2718284 | ILMN_220153 | -2.72 | 0.0017 |
| <i>Dub1a</i>         | ILMN_1224991 | ILMN_220220 | -2.75 | 0.0087 |
| <i>Man1a2</i>        | ILMN_1241339 | ILMN_236517 | -2.78 | 0.0074 |
| <i>C130079G13Rik</i> | ILMN_1232462 | ILMN_211646 | -2.78 | 0.0038 |
| <i>Papola</i>        | ILMN_2602011 | ILMN_240279 | -2.80 | 0.0048 |
| <i>Tcf20</i>         | ILMN_2627638 | ILMN_201560 | -2.81 | 0.0082 |
| <i>Sesn2</i>         | ILMN_1219984 | ILMN_218966 | -2.81 | 0.0057 |
| <i>Bcl11b</i>        | ILMN_2611022 | ILMN_250917 | -2.83 | 0.0081 |
| <i>Art4</i>          | ILMN_1219298 | ILMN_216680 | -2.89 | 0.0016 |
| <i>Brca2</i>         | ILMN_2634750 | ILMN_213209 | -2.90 | 0.0035 |
| <i>BC043301</i>      | ILMN_3114998 | ILMN_250374 | -2.90 | 0.0044 |
| <i>LOC100047009</i>  | ILMN_2610309 | ILMN_323601 | -2.92 | 0.0053 |
| <i>Fgf14</i>         | ILMN_1254854 | ILMN_210013 | -2.92 | 0.0088 |
| <i>Mkx</i>           | ILMN_1249634 | ILMN_219001 | -2.93 | 0.0030 |
| <i>2200001115Rik</i> | ILMN_2678637 | ILMN_217056 | -2.98 | 0.0006 |
| <i>Oas1g</i>         | ILMN_2628822 | ILMN_212179 | -3.00 | 0.0094 |
| <i>H2-M10.3</i>      | ILMN_1247647 | ILMN_196776 | -3.03 | 0.0014 |
| <i>Egr3</i>          | ILMN_2653543 | ILMN_229325 | -3.03 | 0.0088 |
| <i>Fnbp4</i>         | ILMN_1260410 | ILMN_218544 | -3.04 | 0.0068 |
| <i>Ap1g2</i>         | ILMN_1246903 | ILMN_220004 | -3.05 | 0.0004 |
| <i>Rtkn</i>          | ILMN_3143266 | ILMN_233938 | -3.05 | 0.0099 |
| <i>Ubox5</i>         | ILMN_2635377 | ILMN_213265 | -3.05 | 0.0095 |
| <i>LOC100048187</i>  | ILMN_2669015 | ILMN_310968 | -3.06 | 0.0023 |
| <i>Slc26a2</i>       | ILMN_1224606 | ILMN_210168 | -3.06 | 0.0072 |
| <i>Alg5</i>          | ILMN_1222503 | ILMN_215506 | -3.07 | 0.0023 |
| <i>AK129302</i>      | ILMN_3157232 | ILMN_240572 | -3.08 | 0.0036 |
| <i>Zfp551</i>        | ILMN_3160234 | ILMN_245892 | -3.08 | 0.0044 |
| <i>Tpd52</i>         | ILMN_3091288 | ILMN_246767 | -3.08 | 0.0038 |
| <i>Nfrkb</i>         | ILMN_2606777 | ILMN_210554 | -3.08 | 0.0043 |

|                           |              |             |       |        |
|---------------------------|--------------|-------------|-------|--------|
| <i>A630033E08Rik</i>      | ILMN_1243037 | ILMN_223451 | -3.09 | 0.0084 |
| <i>Mrpl43</i>             | ILMN_2598222 | ILMN_209684 | -3.11 | 0.0002 |
| <i>Olfr1437</i>           | ILMN_2844418 | ILMN_227331 | -3.11 | 0.0004 |
| <i>Nudt22</i>             | ILMN_1227723 | ILMN_218008 | -3.12 | 0.0056 |
| <i>Olfr1309</i>           | ILMN_2961541 | ILMN_211051 | -3.13 | 0.0041 |
| <i>H3f3b</i>              | ILMN_2648292 | ILMN_214469 | -3.16 | 0.0038 |
| <i>Rhox9</i>              | ILMN_1234077 | ILMN_222918 | -3.17 | 0.0004 |
| <i>Snapc3</i>             | ILMN_2707634 | ILMN_249101 | -3.17 | 0.0023 |
| <i>9130404D08Rik</i>      | ILMN_2648607 | ILMN_214498 | -3.18 | 0.0042 |
| <i>1700001C19Rik</i>      | ILMN_2955312 | ILMN_251589 | -3.19 | 0.0019 |
| <i>Casp8</i>              | ILMN_3097868 | ILMN_236307 | -3.20 | 0.0063 |
| <i>Glce</i>               | ILMN_2750543 | ILMN_186253 | -3.21 | 0.0000 |
| <i>C130026I21Rik</i>      | ILMN_3162925 | ILMN_317869 | -3.22 | 0.0006 |
| <i>Sez6l</i>              | ILMN_2805839 | ILMN_241595 | -3.22 | 0.0004 |
| <i>Pbx2</i>               | ILMN_2916489 | ILMN_209856 | -3.24 | 0.0027 |
| <i>Ghsr</i>               | ILMN_1221883 | ILMN_208739 | -3.26 | 0.0002 |
| <i>Prdm6</i>              | ILMN_2923625 | ILMN_225376 | -3.26 | 0.0030 |
| <i>Slc10a4</i>            | ILMN_1251845 | ILMN_212856 | -3.26 | 0.0001 |
| <i>Olfr965</i>            | ILMN_3161298 | ILMN_246582 | -3.27 | 0.0031 |
| <i>Adck5</i>              | ILMN_2918317 | ILMN_212693 | -3.27 | 0.0034 |
| <i>Cd6</i>                | ILMN_3117602 | ILMN_209410 | -3.28 | 0.0014 |
| <i>Rpl39</i>              | ILMN_2711551 | ILMN_219633 | -3.29 | 0.0000 |
| <i>Cuta</i>               | ILMN_3041584 | ILMN_216302 | -3.30 | 0.0091 |
| <i>Slc10a7</i>            | ILMN_3162636 | ILMN_234105 | -3.30 | 0.0030 |
| <i>Tac4</i>               | ILMN_1237288 | ILMN_214963 | -3.31 | 0.0009 |
| <i>Rxfp1</i>              | ILMN_2685751 | ILMN_240430 | -3.31 | 0.0011 |
| <i>Hbs1l</i>              | ILMN_1229378 | ILMN_210537 | -3.32 | 0.0011 |
| <i>Polr3h</i>             | ILMN_2939022 | ILMN_209245 | -3.32 | 0.0064 |
| <i>Diap3</i>              | ILMN_2606436 | ILMN_238102 | -3.33 | 0.0043 |
| <i>Actn1</i>              | ILMN_2844996 | ILMN_242046 | -3.35 | 0.0085 |
| <i>D730039F16Rik</i>      | ILMN_2912410 | ILMN_260134 | -3.35 | 0.0058 |
| <i>Taar2</i>              | ILMN_2871830 | ILMN_253121 | -3.35 | 0.0003 |
| <i>Rcor1</i>              | ILMN_1215969 | ILMN_255740 | -3.36 | 0.0005 |
| <i>OTTMUSG00000010136</i> | ILMN_2861524 | ILMN_227730 | -3.36 | 0.0008 |
| <i>Cd160</i>              | ILMN_2707181 | ILMN_219318 | -3.38 | 0.0079 |
| <i>Dapp1</i>              | ILMN_2595822 | ILMN_209445 | -3.41 | 0.0087 |
| <i>Clk2</i>               | ILMN_1238520 | ILMN_208789 | -3.41 | 0.0005 |
| <i>Lman1l</i>             | ILMN_3051282 | ILMN_214284 | -3.42 | 0.0097 |
| <i>Trim23</i>             | ILMN_2879221 | ILMN_186436 | -3.43 | 0.0087 |
| <i>Fez1</i>               | ILMN_1213056 | ILMN_214033 | -3.44 | 0.0085 |
| <i>Gm711</i>              | ILMN_2641920 | ILMN_213893 | -3.44 | 0.0007 |
| <i>Rai1</i>               | ILMN_3147230 | ILMN_222328 | -3.45 | 0.0067 |
| <i>Igsf4a</i>             | ILMN_2505841 | ILMN_194372 | -3.45 | 0.0010 |
| <i>Nkain4</i>             | ILMN_1242188 | ILMN_213011 | -3.46 | 0.0019 |
| <i>Rhbdl1</i>             | ILMN_2710802 | ILMN_219581 | -3.47 | 0.0019 |
| <i>Fert2</i>              | ILMN_2631205 | ILMN_245343 | -3.47 | 0.0002 |
| <i>Mup4</i>               | ILMN_2592166 | ILMN_209061 | -3.48 | 0.0026 |
| <i>Gps1</i>               | ILMN_2632714 | ILMN_209986 | -3.48 | 0.0062 |
| <i>Numa1</i>              | ILMN_2735625 | ILMN_221438 | -3.49 | 0.0023 |
| <i>Pgc</i>                | ILMN_2606088 | ILMN_210484 | -3.50 | 0.0010 |

|                      |              |             |       |        |
|----------------------|--------------|-------------|-------|--------|
| <i>Gnl3</i>          | ILMN_2601639 | ILMN_250637 | -3.50 | 0.0039 |
| <i>Rab25</i>         | ILMN_2781721 | ILMN_241897 | -3.50 | 0.0004 |
| <i>Lefty2</i>        | ILMN_2713164 | ILMN_219748 | -3.50 | 0.0043 |
| <i>Pcsk4</i>         | ILMN_2860850 | ILMN_212743 | -3.51 | 0.0020 |
| <i>Plxnb1</i>        | ILMN_1246710 | ILMN_211279 | -3.53 | 0.0008 |
| <i>Wfdc6b</i>        | ILMN_3062983 | ILMN_233050 | -3.54 | 0.0021 |
| <i>Egfl7</i>         | ILMN_1215919 | ILMN_212285 | -3.58 | 0.0035 |
| <i>Asns</i>          | ILMN_2643513 | ILMN_213406 | -3.59 | 0.0092 |
| <i>Wdr4</i>          | ILMN_2499970 | ILMN_190541 | -3.62 | 0.0003 |
| <i>Acot7</i>         | ILMN_2660182 | ILMN_210493 | -3.62 | 0.0005 |
| <i>9130014G24Rik</i> | ILMN_2931500 | ILMN_220828 | -3.62 | 0.0004 |
| <i>Adamts2</i>       | ILMN_1226259 | ILMN_210818 | -3.63 | 0.0013 |
| <i>Hpcal1</i>        | ILMN_2738750 | ILMN_221667 | -3.64 | 0.0022 |
| <i>Marveld3</i>      | ILMN_2632585 | ILMN_213009 | -3.64 | 0.0033 |
| <i>Elf5</i>          | ILMN_2938440 | ILMN_216298 | -3.65 | 0.0021 |
| <i>Rbbp5</i>         | ILMN_2766338 | ILMN_230998 | -3.66 | 0.0024 |
| <i>Sfi1</i>          | ILMN_1256699 | ILMN_220674 | -3.67 | 0.0008 |
| <i>D630044L22Rik</i> | ILMN_2968887 | ILMN_242493 | -3.67 | 0.0000 |
| <i>Mrc1</i>          | ILMN_1239430 | ILMN_210803 | -3.67 | 0.0005 |
| <i>Wwox</i>          | ILMN_2480178 | ILMN_191565 | -3.68 | 0.0063 |
| <i>Zfp335</i>        | ILMN_1243052 | ILMN_221830 | -3.68 | 0.0000 |
| <i>Stard10</i>       | ILMN_2625601 | ILMN_212367 | -3.68 | 0.0026 |
| <i>Ascl3</i>         | ILMN_2691996 | ILMN_218130 | -3.69 | 0.0003 |
| <i>Zfp498</i>        | ILMN_2960521 | ILMN_241514 | -3.69 | 0.0000 |
| <i>Lamb3</i>         | ILMN_2605512 | ILMN_210428 | -3.70 | 0.0002 |
| <i>Pscdbp</i>        | ILMN_1251748 | ILMN_249986 | -3.71 | 0.0002 |
| <i>Atp6v1e2</i>      | ILMN_2755322 | ILMN_222823 | -3.73 | 0.0000 |
| <i>Krt6a</i>         | ILMN_2738369 | ILMN_210419 | -3.73 | 0.0024 |
| <i>V1rc10</i>        | ILMN_3024850 | ILMN_185781 | -3.74 | 0.0007 |
| <i>Gpx2</i>          | ILMN_2674483 | ILMN_216720 | -3.76 | 0.0055 |
| <i>Riok3</i>         | ILMN_2763548 | ILMN_210509 | -3.76 | 0.0001 |
| <i>Gnai2</i>         | ILMN_2908855 | ILMN_256698 | -3.76 | 0.0007 |
| <i>Oas2</i>          | ILMN_2670150 | ILMN_216357 | -3.77 | 0.0061 |
| <i>Cd6</i>           | ILMN_3042812 | ILMN_209410 | -3.77 | 0.0014 |
| <i>Arl6ip6</i>       | ILMN_2833965 | ILMN_221811 | -3.77 | 0.0097 |
| <i>Chic2</i>         | ILMN_1253410 | ILMN_223679 | -3.78 | 0.0039 |
| <i>Rqcd1</i>         | ILMN_1223145 | ILMN_223408 | -3.80 | 0.0002 |
| <i>4930432K21Rik</i> | ILMN_2672745 | ILMN_249799 | -3.80 | 0.0025 |
| <i>Rab17</i>         | ILMN_2752489 | ILMN_215232 | -3.81 | 0.0013 |
| <i>Morn3</i>         | ILMN_1223151 | ILMN_260560 | -3.81 | 0.0038 |
| <i>Tcf19</i>         | ILMN_2624827 | ILMN_212294 | -3.82 | 0.0007 |
| <i>Zfp653</i>        | ILMN_2755621 | ILMN_222843 | -3.82 | 0.0002 |
| <i>LOC100047468</i>  | ILMN_1257150 | ILMN_328548 | -3.85 | 0.0002 |
| <i>2300002D11Rik</i> | ILMN_3119914 | ILMN_260547 | -3.85 | 0.0007 |
| <i>Gm1008</i>        | ILMN_3021415 | ILMN_238024 | -3.85 | 0.0024 |
| <i>Limk2</i>         | ILMN_2636169 | ILMN_229871 | -3.86 | 0.0025 |
| <i>Abo</i>           | ILMN_2824783 | ILMN_216411 | -3.86 | 0.0007 |
| <i>F730014I05Rik</i> | ILMN_2626864 | ILMN_212475 | -3.89 | 0.0038 |
| <i>Camkk2</i>        | ILMN_1256263 | ILMN_217391 | -3.91 | 0.0001 |
| <i>Zfp791</i>        | ILMN_2990485 | ILMN_234512 | -3.92 | 0.0009 |

|                      |              |             |       |        |
|----------------------|--------------|-------------|-------|--------|
| <i>2500002L14Rik</i> | ILMN_2606015 | ILMN_210478 | -3.92 | 0.0000 |
| <i>Fkbp11</i>        | ILMN_1224635 | ILMN_210599 | -3.94 | 0.0001 |
| <i>Cdc42ep4</i>      | ILMN_2728431 | ILMN_220907 | -3.94 | 0.0002 |
| <i>Dll3</i>          | ILMN_2643777 | ILMN_214055 | -3.95 | 0.0042 |
| <i>Exosc7</i>        | ILMN_2715289 | ILMN_243792 | -3.96 | 0.0002 |
| <i>1190003J15Rik</i> | ILMN_2734924 | ILMN_238108 | -3.97 | 0.0097 |
| <i>Bsdcl</i>         | ILMN_1234100 | ILMN_222959 | -3.97 | 0.0004 |
| <i>Arhgef3</i>       | ILMN_2645208 | ILMN_214179 | -3.98 | 0.0017 |
| <i>Snph</i>          | ILMN_1234340 | ILMN_208769 | -3.98 | 0.0007 |
| <i>BC037034</i>      | ILMN_1257019 | ILMN_222839 | -3.99 | 0.0008 |
| <i>Tagln</i>         | ILMN_1243652 | ILMN_231234 | -3.99 | 0.0007 |
| <i>Blvra</i>         | ILMN_1257284 | ILMN_215490 | -4.00 | 0.0005 |
| <i>Zic2</i>          | ILMN_2470518 | ILMN_190478 | -4.01 | 0.0002 |
| <i>Zfp187</i>        | ILMN_3145975 | ILMN_247449 | -4.03 | 0.0037 |
| <i>2610020H08Rik</i> | ILMN_3143621 | ILMN_250105 | -4.03 | 0.0000 |
| <i>Gimap5</i>        | ILMN_2643096 | ILMN_213996 | -4.04 | 0.0001 |
| <i>Spag16</i>        | ILMN_3115326 | ILMN_229838 | -4.05 | 0.0000 |
| <i>LOC100044177</i>  | ILMN_1232495 | ILMN_330013 | -4.05 | 0.0000 |
| <i>Hnrpa3</i>        | ILMN_2666458 | ILMN_209535 | -4.06 | 0.0000 |
| <i>LOC100045304</i>  | ILMN_1237729 | ILMN_321302 | -4.07 | 0.0000 |
| <i>Calcr</i>         | ILMN_3120532 | ILMN_226309 | -4.08 | 0.0002 |
| <i>EG224180</i>      | ILMN_2596575 | ILMN_322467 | -4.08 | 0.0001 |
| <i>Sfnl1</i>         | ILMN_1245376 | ILMN_219554 | -4.09 | 0.0075 |
| <i>Cdx4</i>          | ILMN_1241829 | ILMN_221708 | -4.09 | 0.0037 |
| <i>H2-DMb2</i>       | ILMN_2979639 | ILMN_244938 | -4.10 | 0.0007 |
| <i>Sv2a</i>          | ILMN_2702887 | ILMN_218994 | -4.10 | 0.0000 |
| <i>Adam28</i>        | ILMN_2664739 | ILMN_215881 | -4.11 | 0.0000 |
| <i>Mta3</i>          | ILMN_1259783 | ILMN_219551 | -4.11 | 0.0001 |
| <i>2210016L21Rik</i> | ILMN_1251123 | ILMN_212114 | -4.14 | 0.0001 |
| <i>Htr5b</i>         | ILMN_2595319 | ILMN_209384 | -4.16 | 0.0002 |
| <i>Olfr1275</i>      | ILMN_3161942 | ILMN_240876 | -4.17 | 0.0068 |
| <i>Tmem128</i>       | ILMN_2674032 | ILMN_216686 | -4.18 | 0.0008 |
| <i>Csprs</i>         | ILMN_2661289 | ILMN_215584 | -4.19 | 0.0000 |
| <i>LOC100043986</i>  | ILMN_1228783 | ILMN_329081 | -4.20 | 0.0031 |
| <i>Aox1</i>          | ILMN_1238033 | ILMN_213723 | -4.20 | 0.0000 |
| <i>Slc17a6</i>       | ILMN_2922321 | ILMN_227493 | -4.21 | 0.0002 |
| <i>Arhgap25</i>      | ILMN_3155245 | ILMN_211295 | -4.23 | 0.0001 |
| <i>Cyp7b1</i>        | ILMN_2601215 | ILMN_209999 | -4.24 | 0.0021 |
| <i>Lig1</i>          | ILMN_2657356 | ILMN_209408 | -4.26 | 0.0005 |
| <i>Ccdc50</i>        | ILMN_2737381 | ILMN_221575 | -4.26 | 0.0002 |
| <i>Col9a3</i>        | ILMN_2597314 | ILMN_209595 | -4.28 | 0.0019 |
| <i>Rpa1</i>          | ILMN_2750801 | ILMN_222519 | -4.30 | 0.0009 |
| <i>Spdef</i>         | ILMN_1258162 | ILMN_222088 | -4.30 | 0.0005 |
| <i>Gnb1l</i>         | ILMN_3059059 | ILMN_210607 | -4.31 | 0.0000 |
| <i>Zc3hav1l</i>      | ILMN_1215954 | ILMN_214101 | -4.33 | 0.0081 |
| <i>Slc25a23</i>      | ILMN_2675672 | ILMN_259482 | -4.35 | 0.0000 |
| <i>Rnase11</i>       | ILMN_2877153 | ILMN_252274 | -4.36 | 0.0021 |
| <i>BC050092</i>      | ILMN_2694022 | ILMN_218292 | -4.36 | 0.0011 |
| <i>Lgals9</i>        | ILMN_2752873 | ILMN_220025 | -4.38 | 0.0000 |
| <i>Sipi</i>          | ILMN_1256817 | ILMN_219640 | -4.41 | 0.0000 |

|                      |              |             |       |        |
|----------------------|--------------|-------------|-------|--------|
| <i>Pcdhga2</i>       | ILMN_2746009 | ILMN_222189 | -4.42 | 0.0003 |
| <i>1200014M14Rik</i> | ILMN_2613750 | ILMN_211223 | -4.43 | 0.0043 |
| <i>Arid4b</i>        | ILMN_3133267 | ILMN_222307 | -4.45 | 0.0000 |
| <i>Olfir972</i>      | ILMN_2603196 | ILMN_210200 | -4.48 | 0.0000 |
| <i>Mlph</i>          | ILMN_3162347 | ILMN_212716 | -4.48 | 0.0002 |
| <i>Rtp3</i>          | ILMN_2864416 | ILMN_256934 | -4.48 | 0.0001 |
| <i>Olfir56</i>       | ILMN_1255631 | ILMN_213568 | -4.49 | 0.0003 |
| <i>Bace2</i>         | ILMN_2738449 | ILMN_211339 | -4.50 | 0.0013 |
| <i>Cmtm7</i>         | ILMN_2648409 | ILMN_214480 | -4.50 | 0.0022 |
| <i>Krt7</i>          | ILMN_2961152 | ILMN_223017 | -4.51 | 0.0003 |
| <i>Cxcl15</i>        | ILMN_2635462 | ILMN_213274 | -4.51 | 0.0000 |
| <i>Mrpl32</i>        | ILMN_2695342 | ILMN_229757 | -4.53 | 0.0000 |
| <i>Sf1</i>           | ILMN_2449335 | ILMN_188043 | -4.53 | 0.0003 |
| <i>Zfp128</i>        | ILMN_2828139 | ILMN_226457 | -4.54 | 0.0000 |
| <i>Mat2b</i>         | ILMN_2588505 | ILMN_208679 | -4.54 | 0.0057 |
| <i>Adh1</i>          | ILMN_2850077 | ILMN_214816 | -4.55 | 0.0000 |
| <i>Epha1</i>         | ILMN_2972748 | ILMN_213132 | -4.55 | 0.0000 |
| <i>Fem1a</i>         | ILMN_2695936 | ILMN_259010 | -4.58 | 0.0000 |
| <i>Olfir360</i>      | ILMN_1224535 | ILMN_221921 | -4.60 | 0.0010 |
| <i>Cdc20</i>         | ILMN_2612206 | ILMN_211070 | -4.60 | 0.0012 |
| <i>Eftud2</i>        | ILMN_2604097 | ILMN_210286 | -4.60 | 0.0022 |
| <i>Tns4</i>          | ILMN_1236029 | ILMN_216838 | -4.61 | 0.0001 |
| <i>Tgfbr1</i>        | ILMN_2708965 | ILMN_210148 | -4.61 | 0.0000 |
| <i>Usp6nl</i>        | ILMN_3079038 | ILMN_256050 | -4.61 | 0.0001 |
| <i>Kcnk5</i>         | ILMN_2982781 | ILMN_218669 | -4.62 | 0.0044 |
| <i>Nfat5</i>         | ILMN_2732123 | ILMN_221186 | -4.62 | 0.0000 |
| <i>Tmprss2</i>       | ILMN_1223880 | ILMN_189973 | -4.62 | 0.0027 |
| <i>Tmigd1</i>        | ILMN_1220817 | ILMN_216690 | -4.63 | 0.0005 |
| <i>Dnajc11</i>       | ILMN_1237476 | ILMN_237725 | -4.63 | 0.0000 |
| <i>Gpr89</i>         | ILMN_2672544 | ILMN_216563 | -4.69 | 0.0002 |
| <i>Rcn2</i>          | ILMN_2775778 | ILMN_245956 | -4.69 | 0.0000 |
| <i>2610528O22Rik</i> | ILMN_2710773 | ILMN_184416 | -4.69 | 0.0000 |
| <i>Kcnk1</i>         | ILMN_3009501 | ILMN_237297 | -4.73 | 0.0036 |
| <i>Gcnt1</i>         | ILMN_2672297 | ILMN_214513 | -4.73 | 0.0000 |
| <i>Abpg</i>          | ILMN_2696136 | ILMN_218461 | -4.75 | 0.0000 |
| <i>Angel2</i>        | ILMN_3160697 | ILMN_235616 | -4.76 | 0.0000 |
| <i>Cd9</i>           | ILMN_2725414 | ILMN_220691 | -4.78 | 0.0000 |
| <i>Gm813</i>         | ILMN_2529961 | ILMN_240351 | -4.79 | 0.0000 |
| <i>Il17re</i>        | ILMN_3162860 | ILMN_258357 | -4.79 | 0.0002 |
| <i>Bet1</i>          | ILMN_2833495 | ILMN_218670 | -4.79 | 0.0021 |
| <i>Fpgs</i>          | ILMN_2870443 | ILMN_221380 | -4.80 | 0.0074 |
| <i>Rpl17</i>         | ILMN_2677935 | ILMN_244238 | -4.82 | 0.0095 |
| <i>Slit2</i>         | ILMN_1253797 | ILMN_259247 | -4.83 | 0.0008 |
| <i>Tram1</i>         | ILMN_2487934 | ILMN_192424 | -4.83 | 0.0019 |
| <i>Tcfap2c</i>       | ILMN_2783225 | ILMN_223577 | -4.84 | 0.0003 |
| <i>Egfr</i>          | ILMN_3128725 | ILMN_207468 | -4.86 | 0.0095 |
| <i>Hnrpd1</i>        | ILMN_2690061 | ILMN_217979 | -4.91 | 0.0004 |
| <i>Lman1l</i>        | ILMN_3127595 | ILMN_214284 | -4.92 | 0.0000 |
| <i>EG668668</i>      | ILMN_2890533 | ILMN_247763 | -4.92 | 0.0037 |
| <i>4933407N01Rik</i> | ILMN_2604205 | ILMN_210297 | -4.93 | 0.0000 |

|                      |              |             |       |        |
|----------------------|--------------|-------------|-------|--------|
| <i>Med22</i>         | ILMN_3100456 | ILMN_252613 | -4.93 | 0.0013 |
| <i>Rabgap1</i>       | ILMN_2685079 | ILMN_217584 | -4.94 | 0.0030 |
| <i>Figl1</i>         | ILMN_2663604 | ILMN_215790 | -4.94 | 0.0048 |
| <i>Npal2</i>         | ILMN_2723369 | ILMN_235586 | -4.95 | 0.0000 |
| <i>Tcfap2b</i>       | ILMN_1223731 | ILMN_238889 | -4.95 | 0.0000 |
| <i>Klra4</i>         | ILMN_3104704 | ILMN_196771 | -4.96 | 0.0016 |
| <i>Use1</i>          | ILMN_2667101 | ILMN_212247 | -4.98 | 0.0000 |
| <i>Rab27a</i>        | ILMN_2614966 | ILMN_211354 | -5.00 | 0.0067 |
| <i>Ildr1</i>         | ILMN_2857684 | ILMN_219794 | -5.01 | 0.0011 |
| <i>Elf5</i>          | ILMN_2736380 | ILMN_216298 | -5.02 | 0.0000 |
| <i>Pdia4</i>         | ILMN_1249670 | ILMN_215714 | -5.03 | 0.0000 |
| <i>Myrip</i>         | ILMN_2665441 | ILMN_215939 | -5.06 | 0.0000 |
| <i>Repin1</i>        | ILMN_3131197 | ILMN_210453 | -5.07 | 0.0002 |
| <i>Inpp1</i>         | ILMN_2901801 | ILMN_217833 | -5.08 | 0.0001 |
| <i>Lce1a2</i>        | ILMN_2731819 | ILMN_221168 | -5.09 | 0.0000 |
| <i>Taar8a</i>        | ILMN_1239691 | ILMN_238027 | -5.10 | 0.0036 |
| <i>Vamp8</i>         | ILMN_1219136 | ILMN_190514 | -5.10 | 0.0001 |
| <i>Suv420h1</i>      | ILMN_1250037 | ILMN_232745 | -5.10 | 0.0018 |
| <i>Mug4</i>          | ILMN_2774563 | ILMN_317028 | -5.11 | 0.0000 |
| <i>Pip5k1b</i>       | ILMN_2711562 | ILMN_219634 | -5.11 | 0.0000 |
| <i>Gjb2</i>          | ILMN_2999627 | ILMN_210347 | -5.13 | 0.0000 |
| <i>Gdf6</i>          | ILMN_2663449 | ILMN_215775 | -5.13 | 0.0017 |
| <i>Dok1</i>          | ILMN_2704141 | ILMN_212187 | -5.13 | 0.0023 |
| <i>A530032D15Rik</i> | ILMN_2892518 | ILMN_245493 | -5.19 | 0.0000 |
| <i>Odc1</i>          | ILMN_3008406 | ILMN_219842 | -5.20 | 0.0001 |
| <i>Dyrk3</i>         | ILMN_2699522 | ILMN_258582 | -5.21 | 0.0000 |
| <i>Prom2</i>         | ILMN_1246392 | ILMN_214759 | -5.23 | 0.0003 |
| <i>Pabpc1</i>        | ILMN_1259482 | ILMN_201529 | -5.24 | 0.0004 |
| <i>Kcnn4</i>         | ILMN_2765032 | ILMN_223516 | -5.26 | 0.0030 |
| <i>Bglap1</i>        | ILMN_3101908 | ILMN_210884 | -5.26 | 0.0000 |
| <i>Pml</i>           | ILMN_2732576 | ILMN_249462 | -5.26 | 0.0000 |
| <i>Egf</i>           | ILMN_2684104 | ILMN_217509 | -5.30 | 0.0000 |
| <i>Pou3f4</i>        | ILMN_3162068 | ILMN_249620 | -5.30 | 0.0005 |
| <i>Med22</i>         | ILMN_3041056 | ILMN_225085 | -5.31 | 0.0000 |
| <i>Edem2</i>         | ILMN_2669280 | ILMN_226722 | -5.32 | 0.0018 |
| <i>Psmb2</i>         | ILMN_2949632 | ILMN_216114 | -5.32 | 0.0000 |
| <i>Lnx2</i>          | ILMN_2598990 | ILMN_209763 | -5.33 | 0.0021 |
| <i>Rnasen</i>        | ILMN_3144358 | ILMN_224762 | -5.34 | 0.0002 |
| <i>Ift20</i>         | ILMN_2847618 | ILMN_209051 | -5.34 | 0.0005 |
| <i>3110043J09Rik</i> | ILMN_1228093 | ILMN_252216 | -5.34 | 0.0000 |
| <i>Sap30l</i>        | ILMN_3128784 | ILMN_226600 | -5.35 | 0.0019 |
| <i>Olfr1208</i>      | ILMN_2630221 | ILMN_212778 | -5.35 | 0.0006 |
| <i>Asb3</i>          | ILMN_1236376 | ILMN_246247 | -5.37 | 0.0062 |
| <i>Lce3f</i>         | ILMN_2610594 | ILMN_240447 | -5.38 | 0.0000 |
| <i>Rgs7</i>          | ILMN_1237219 | ILMN_223755 | -5.39 | 0.0002 |
| <i>LOC100046616</i>  | ILMN_1259982 | ILMN_324507 | -5.39 | 0.0006 |
| <i>Slc12a8</i>       | ILMN_2721789 | ILMN_312656 | -5.40 | 0.0000 |
| <i>Elf5</i>          | ILMN_2669510 | ILMN_216298 | -5.42 | 0.0021 |
| <i>Brwd2</i>         | ILMN_2476131 | ILMN_191104 | -5.43 | 0.0037 |
| <i>Cyp4f16</i>       | ILMN_2729452 | ILMN_220247 | -5.45 | 0.0000 |

|                      |              |             |       |        |
|----------------------|--------------|-------------|-------|--------|
| <i>1810037C20Rik</i> | ILMN_2724415 | ILMN_220614 | -5.45 | 0.0002 |
| <i>Ucp3</i>          | ILMN_1233132 | ILMN_188370 | -5.45 | 0.0002 |
| <i>AI593442</i>      | ILMN_2733828 | ILMN_215023 | -5.47 | 0.0000 |
| <i>1700027D21Rik</i> | ILMN_1255463 | ILMN_222714 | -5.53 | 0.0000 |
| <i>Mup5</i>          | ILMN_3158509 | ILMN_214274 | -5.54 | 0.0002 |
| <i>Cd44</i>          | ILMN_2754990 | ILMN_245439 | -5.56 | 0.0000 |
| <i>Oit1</i>          | ILMN_2732163 | ILMN_221188 | -5.57 | 0.0000 |
| <i>Slc2a2</i>        | ILMN_2750284 | ILMN_210368 | -5.59 | 0.0000 |
| <i>5031414D18Rik</i> | ILMN_2615575 | ILMN_211408 | -5.60 | 0.0003 |
| <i>Efna4</i>         | ILMN_1217493 | ILMN_217975 | -5.62 | 0.0003 |
| <i>Elf4</i>          | ILMN_2672054 | ILMN_216519 | -5.64 | 0.0000 |
| <i>Sftpb</i>         | ILMN_2733762 | ILMN_221309 | -5.66 | 0.0000 |
| <i>Scly</i>          | ILMN_2628281 | ILMN_212598 | -5.68 | 0.0000 |
| <i>Abcb9</i>         | ILMN_2597248 | ILMN_184826 | -5.68 | 0.0001 |
| <i>Mycbp2</i>        | ILMN_1238676 | ILMN_216306 | -5.70 | 0.0029 |
| <i>Cbs</i>           | ILMN_1230318 | ILMN_216850 | -5.70 | 0.0004 |
| <i>Rhou</i>          | ILMN_1237773 | ILMN_215476 | -5.75 | 0.0006 |
| <i>Uhmk1</i>         | ILMN_2958626 | ILMN_231443 | -5.75 | 0.0004 |
| <i>Klk1b1</i>        | ILMN_1256119 | ILMN_196746 | -5.76 | 0.0071 |
| <i>Drg1</i>          | ILMN_1238919 | ILMN_214214 | -5.81 | 0.0000 |
| <i>Krt23</i>         | ILMN_2671165 | ILMN_216445 | -5.82 | 0.0002 |
| <i>Slc7a4</i>        | ILMN_2639360 | ILMN_229227 | -5.83 | 0.0002 |
| <i>Olf204</i>        | ILMN_3160401 | ILMN_249951 | -5.84 | 0.0011 |
| <i>Col12a1</i>       | ILMN_2862538 | ILMN_212667 | -5.85 | 0.0000 |
| <i>Cdk8</i>          | ILMN_2726092 | ILMN_211503 | -5.85 | 0.0000 |
| <i>Mif</i>           | ILMN_2867835 | ILMN_207449 | -5.87 | 0.0000 |
| <i>Rab15</i>         | ILMN_2637398 | ILMN_213476 | -5.91 | 0.0013 |
| <i>Foxf1a</i>        | ILMN_2667396 | ILMN_216104 | -5.92 | 0.0001 |
| <i>Ogt</i>           | ILMN_1247078 | ILMN_211022 | -5.93 | 0.0081 |
| <i>Slc6a6</i>        | ILMN_2641467 | ILMN_213853 | -5.94 | 0.0000 |
| <i>Fa2h</i>          | ILMN_2746783 | ILMN_222241 | -5.96 | 0.0072 |
| <i>D330045A20Rik</i> | ILMN_2706677 | ILMN_214422 | -5.96 | 0.0000 |
| <i>Rfxdc1</i>        | ILMN_2734616 | ILMN_221366 | -5.98 | 0.0002 |
| <i>Zbp1</i>          | ILMN_1228653 | ILMN_194818 | -5.99 | 0.0000 |
| <i>Mrps11</i>        | ILMN_2786708 | ILMN_215405 | -6.06 | 0.0036 |
| <i>Stk22a</i>        | ILMN_1251399 | ILMN_188051 | -6.07 | 0.0062 |
| <i>Flvcr2</i>        | ILMN_1248190 | ILMN_222509 | -6.11 | 0.0004 |
| <i>Garnl4</i>        | ILMN_2940713 | ILMN_226588 | -6.13 | 0.0000 |
| <i>Phlda1</i>        | ILMN_2754985 | ILMN_222798 | -6.13 | 0.0000 |
| <i>9430023L20Rik</i> | ILMN_1238679 | ILMN_212911 | -6.16 | 0.0000 |
| <i>Phlda2</i>        | ILMN_2425029 | ILMN_249746 | -6.17 | 0.0000 |
| <i>Bsnd</i>          | ILMN_2669493 | ILMN_216297 | -6.17 | 0.0000 |
| <i>Psmc9</i>         | ILMN_2594811 | ILMN_248163 | -6.22 | 0.0001 |
| <i>Nags</i>          | ILMN_2617735 | ILMN_211619 | -6.23 | 0.0000 |
| <i>Gira4</i>         | ILMN_2663121 | ILMN_215745 | -6.23 | 0.0000 |
| <i>Aspn</i>          | ILMN_1231476 | ILMN_213249 | -6.41 | 0.0000 |
| <i>Tac1</i>          | ILMN_1251000 | ILMN_220916 | -6.42 | 0.0000 |
| <i>Ccdc38</i>        | ILMN_2716995 | ILMN_220050 | -6.43 | 0.0000 |
| <i>Cdc21l</i>        | ILMN_1241980 | ILMN_213876 | -6.43 | 0.0000 |
| <i>Prrc1</i>         | ILMN_2666406 | ILMN_216021 | -6.56 | 0.0000 |

|                      |              |             |       |        |
|----------------------|--------------|-------------|-------|--------|
| <i>Erc2</i>          | ILMN_1233075 | ILMN_212790 | -6.62 | 0.0000 |
| <i>Abpa</i>          | ILMN_1249191 | ILMN_216701 | -6.63 | 0.0000 |
| <i>Prlr</i>          | ILMN_2617005 | ILMN_210332 | -6.65 | 0.0003 |
| <i>Acpp</i>          | ILMN_2693019 | ILMN_218213 | -6.70 | 0.0006 |
| <i>Mkrn1</i>         | ILMN_2630018 | ILMN_212764 | -6.72 | 0.0000 |
| <i>Erlin2</i>        | ILMN_2816315 | ILMN_211648 | -6.73 | 0.0000 |
| <i>4933424B01Rik</i> | ILMN_1252267 | ILMN_210623 | -6.74 | 0.0000 |
| <i>Eif3h</i>         | ILMN_1215703 | ILMN_219124 | -6.77 | 0.0000 |
| <i>Smgc</i>          | ILMN_2602496 | ILMN_210125 | -6.79 | 0.0000 |
| <i>Capg</i>          | ILMN_3115281 | ILMN_239751 | -6.79 | 0.0000 |
| <i>EG623661</i>      | ILMN_2993944 | ILMN_227099 | -6.87 | 0.0005 |
| <i>Jmjd1a</i>        | ILMN_2707895 | ILMN_248615 | -6.87 | 0.0000 |
| <i>Midn</i>          | ILMN_1228026 | ILMN_209610 | -6.89 | 0.0000 |
| <i>Epn1</i>          | ILMN_1250501 | ILMN_235298 | -6.91 | 0.0000 |
| <i>Chmp7</i>         | ILMN_2843548 | ILMN_208690 | -6.93 | 0.0000 |
| <i>Klk1b27</i>       | ILMN_1252131 | ILMN_196774 | -6.99 | 0.0000 |
| <i>Sec14l1</i>       | ILMN_2953751 | ILMN_238122 | -7.05 | 0.0000 |
| <i>Edem2</i>         | ILMN_2684279 | ILMN_226722 | -7.05 | 0.0000 |
| <i>Bsx</i>           | ILMN_1228573 | ILMN_247817 | -7.09 | 0.0000 |
| <i>Wnt2b</i>         | ILMN_2512976 | ILMN_195010 | -7.09 | 0.0000 |
| <i>Smgc</i>          | ILMN_2775962 | ILMN_244638 | -7.11 | 0.0000 |
| <i>Ckmt1</i>         | ILMN_2773537 | ILMN_235471 | -7.15 | 0.0000 |
| <i>Slc31a1</i>       | ILMN_1254437 | ILMN_221784 | -7.16 | 0.0000 |
| <i>Rev1</i>          | ILMN_2928573 | ILMN_213219 | -7.22 | 0.0000 |
| <i>Klk1</i>          | ILMN_2760199 | ILMN_196747 | -7.28 | 0.0000 |
| <i>Trim23</i>        | ILMN_2455830 | ILMN_186436 | -7.36 | 0.0000 |
| <i>Rbm35a</i>        | ILMN_2947559 | ILMN_210806 | -7.42 | 0.0000 |
| <i>Gng7</i>          | ILMN_3030009 | ILMN_223721 | -7.52 | 0.0000 |
| <i>1500015010Rik</i> | ILMN_1249000 | ILMN_222808 | -7.56 | 0.0000 |
| <i>LOC100041187</i>  | ILMN_2589902 | ILMN_312862 | -7.71 | 0.0004 |
| <i>LOC100047815</i>  | ILMN_1246266 | ILMN_310521 | -7.76 | 0.0000 |
| <i>Rps12</i>         | ILMN_2956159 | ILMN_201571 | -7.79 | 0.0000 |
| <i>Mup5</i>          | ILMN_3079257 | ILMN_214274 | -7.80 | 0.0000 |
| <i>Muc13</i>         | ILMN_2681805 | ILMN_217318 | -7.82 | 0.0001 |
| <i>Muc10</i>         | ILMN_2623234 | ILMN_212146 | -7.85 | 0.0000 |
| <i>Olfr635</i>       | ILMN_2704500 | ILMN_213553 | -7.98 | 0.0059 |
| <i>Kal1</i>          | ILMN_1239717 | ILMN_223014 | -7.98 | 0.0000 |
| <i>2810048G17Rik</i> | ILMN_2677612 | ILMN_215430 | -8.09 | 0.0000 |
| <i>Igf2bp3</i>       | ILMN_1218913 | ILMN_218056 | -8.11 | 0.0025 |
| <i>Ngfb</i>          | ILMN_2660233 | ILMN_215493 | -8.32 | 0.0000 |
| <i>Lama2</i>         | ILMN_2769479 | ILMN_259802 | -8.40 | 0.0000 |
| <i>Psp</i>           | ILMN_1245726 | ILMN_216963 | -8.41 | 0.0000 |
| <i>Klk1b4</i>        | ILMN_2697256 | ILMN_199361 | -8.50 | 0.0000 |
| <i>Klc4</i>          | ILMN_1251301 | ILMN_238823 | -8.54 | 0.0000 |
| <i>Grhl1</i>         | ILMN_1246419 | ILMN_214278 | -8.68 | 0.0000 |
| <i>Klk1b5</i>        | ILMN_2731191 | ILMN_196768 | -8.72 | 0.0000 |
| <i>Lpin2</i>         | ILMN_1220680 | ILMN_192385 | -8.75 | 0.0000 |
| <i>Tacr3</i>         | ILMN_1237995 | ILMN_216524 | -8.83 | 0.0000 |
| <i>Klk1b16</i>       | ILMN_1259613 | ILMN_196767 | -8.86 | 0.0000 |
| <i>Mist1</i>         | ILMN_2651388 | ILMN_214740 | -8.89 | 0.0000 |



|                      |              |             |        |        |
|----------------------|--------------|-------------|--------|--------|
| <i>Ngfb</i>          | ILMN_2937596 | ILMN_215493 | -8.95  | 0.0000 |
| <i>Wfdc2</i>         | ILMN_1236758 | ILMN_216447 | -8.96  | 0.0000 |
| <i>Klk1b21</i>       | ILMN_2732087 | ILMN_196711 | -8.96  | 0.0000 |
| <i>6330503K22Rik</i> | ILMN_1228426 | ILMN_210079 | -8.97  | 0.0000 |
| <i>Klk1b24</i>       | ILMN_2622463 | ILMN_196770 | -9.02  | 0.0000 |
| <i>Klk1b27</i>       | ILMN_3009447 | ILMN_196774 | -9.15  | 0.0000 |
| <i>Klk1b11</i>       | ILMN_2979432 | ILMN_196710 | -9.23  | 0.0000 |
| <i>Stk39</i>         | ILMN_2751494 | ILMN_222561 | -9.27  | 0.0000 |
| <i>Cldn3</i>         | ILMN_2634167 | ILMN_213147 | -9.30  | 0.0000 |
| <i>Klk1b9</i>        | ILMN_2784773 | ILMN_196709 | -9.34  | 0.0000 |
| <i>Gm1661</i>        | ILMN_2955129 | ILMN_241347 | -9.68  | 0.0004 |
| <i>Klk1b9</i>        | ILMN_2723594 | ILMN_196709 | -9.72  | 0.0000 |
| <i>1700001J03Rik</i> | ILMN_2666574 | ILMN_226748 | -9.94  | 0.0000 |
| <i>Rnu6</i>          | ILMN_2959272 | ILMN_243060 | -10.21 | 0.0000 |
| <i>Muc13</i>         | ILMN_2717678 | ILMN_217318 | -10.24 | 0.0000 |
| <i>Aqp5</i>          | ILMN_3115472 | ILMN_217154 | -10.68 | 0.0000 |
| <i>2310057J18Rik</i> | ILMN_2940678 | ILMN_210967 | -10.69 | 0.0000 |
| <i>Casq2</i>         | ILMN_1247775 | ILMN_222933 | -10.94 | 0.0000 |
| <i>Inpp5e</i>        | ILMN_2820213 | ILMN_214064 | -11.50 | 0.0000 |
| <i>Gsg1</i>          | ILMN_1222441 | ILMN_252058 | -12.07 | 0.0000 |
| <i>Pigr</i>          | ILMN_1225605 | ILMN_220227 | -13.14 | 0.0000 |
| <i>Folr1</i>         | ILMN_2707541 | ILMN_219347 | -17.22 | 0.0000 |

---
