# Supplementary material for: Deconvolution of expression microarray data reveals 131I-induced responses otherwise undetected in thyroid tissue
Source: PubMed Central journal article supplement (PMC6042689; doi:10.1371/journal.pone.0197911), 2018-07-12
Supplement: pone.0197911.s007.pdf [file pone.0197911.s007.pdf]

Supplemental Table 5. Significantly regulated kallikrein transcripts

| Gene symbol                                            | Probe ID     | Thyroid tissue       | Follicular cells     | C-cells              |
|--------------------------------------------------------|--------------|----------------------|----------------------|----------------------|
|                                                        |              | (conv.)              | (deconv.)            | (deconv.)            |
| log <sub>2</sub> ratio; fold change (adjusted p-value) |              |                      |                      |                      |
| <i>Klk1</i>                                            | ILMN_2760199 |                      | -10 ; -1442 (0.0000) | -7.3 ; -156 (0.0000) |
| <i>Klk1b1</i>                                          | ILMN_1256119 |                      | -2.8 ; -7.2 (0.0014) | -5.8 ; -54 (0.0071)  |
| <i>Klk1b11</i>                                         | ILMN_2632912 | -5.4 ; -43 (0.0000)  | -6.7 ; -107 (0.0000) |                      |
| <i>Klk1b11</i>                                         | ILMN_2979432 | -6.6 ; -100 (0.0000) | -8.1 ; -268 (0.0000) | -9.2 ; -602 (0.0000) |
| <i>Klk1b16</i>                                         | ILMN_1259613 | -5.7 ; -52 (0.0000)  | -7.4 ; -169 (0.0000) | -8.9 ; -463 (0.0000) |
| <i>Klk1b21</i>                                         | ILMN_2651099 | -5.2 ; -38 (0.0000)  | -6.5 ; -89 (0.0000)  |                      |
| <i>Klk1b21</i>                                         | ILMN_2732087 |                      | -6.8 ; -112 (0.0000) | -9.0 ; -499 (0.0000) |
| <i>Klk1b22</i>                                         | ILMN_2946653 | -6.6 ; -100 (0.0000) | -8.9 ; -482 (0.0000) |                      |
| <i>Klk1b24</i>                                         | ILMN_2622463 | -5.8 ; -54 (0.0000)  | -8.0 ; -259 (0.0000) | -9.0 ; -520 (0.0000) |
| <i>Klk1b26</i>                                         | ILMN_1217308 | -6.8 ; -115 (0.0000) | -8.4 ; -329 (0.0000) |                      |
| <i>Klk1b27</i>                                         | ILMN_1252131 | -7.2 ; -150 (0.0000) | -6.7 ; -103 (0.0000) | -7.0 ; -127 (0.0000) |
| <i>Klk1b27</i>                                         | ILMN_3009447 | -6.2 ; -74 (0.0000)  | -7.7 ; -214 (0.0000) | -9.1 ; -568 (0.0000) |
| <i>Klk1b4</i>                                          | ILMN_1238736 |                      | -6.8 ; -109 (0.0000) |                      |
| <i>Klk1b4</i>                                          | ILMN_2697256 | -6.5 ; -91 (0.0000)  | -9.2 ; -590 (0.0000) | -8.5 ; -362 (0.0000) |
| <i>Klk1b5</i>                                          | ILMN_1224893 | -6.0 ; -66 (0.0000)  | -6.1 ; -67 (0.0000)  |                      |
| <i>Klk1b5</i>                                          | ILMN_2731191 |                      | -6.5 ; -88 (0.0000)  | -8.7 ; -420 (0.0000) |
| <i>Klk1b8</i>                                          | ILMN_1216962 | -6.3 ; -79 (0.0000)  | -6.9 ; -121 (0.0000) |                      |
| <i>Klk1b9</i>                                          | ILMN_2723594 | -5.8 ; -56 (0.0000)  | -7.6 ; -187 (0.0000) | -9.7 ; -845 (0.0000) |
| <i>Klk1b9</i>                                          | ILMN_2784773 | -6.3 ; -76 (0.0000)  | -7.1 ; -133 (0.0000) | -9.3 ; -648 (0.0000) |

P-values given as 0.0000 designate values below 5.0E-05, i.e. values below the Nexus Expression limit.
