# Supplementary material for: Deconvolution of expression microarray data reveals 131I-induced responses otherwise undetected in thyroid tissue
Source: PubMed Central journal article supplement (PMC6042689; doi:10.1371/journal.pone.0197911), 2018-07-12
Supplement: pone.0197911.s008.pdf [file pone.0197911.s008.pdf]

**Supplemental Table 6. IR associated gene signature for higher and lower C-cell frequency estimates**

| Gene symbol<br>(synonym)                               | Probe ID     | Thyroid tissue       | Follicular cells    |                   | C-cells            |           |
|--------------------------------------------------------|--------------|----------------------|---------------------|-------------------|--------------------|-----------|
|                                                        |              | (conv.)              | (deconv.)           |                   | (deconv.)          |           |
| log <sub>2</sub> ratio; fold change (adjusted p-value) |              |                      |                     |                   |                    |           |
|                                                        |              |                      | cF = 0.11           | cF = 0.05         | cF = 0.11          | cF = 0.05 |
| <i>Ccnd1</i> <sup>†</sup>                              | ILMN_1221503 | -0.92; -1.9 (0.0019) |                     | 2.7; 6.6 (0.0022) |                    |           |
|                                                        | ILMN_2601471 | -0.91; -1.9 (0.0002) |                     |                   |                    |           |
| <i>Ccng1</i>                                           | ILMN_2500276 | 0.81; 1.8 (0.0076)   | -2.5; -5.7 (0.0096) |                   |                    |           |
| <i>Cdkn1a</i> <sup>†</sup>                             | ILMN_2846775 |                      | -3.4; -11 (0.0001)  |                   |                    |           |
| <i>Fos</i> <sup>†</sup>                                | ILMN_2750515 |                      | 5.0; 32 (0.0001)    | 3.8; 14 (0.0002)  |                    |           |
| <i>Gjb2</i>                                            | ILMN_1227148 | -2.2; -4.6 (0.0000)  |                     |                   |                    |           |
|                                                        | ILMN_2999627 | -2.9; -7.5 (0.0000)  |                     |                   | -5.1; -34 (0.0000) |           |
| <i>Naa35 (Mak10)</i>                                   | ILMN_2828599 |                      | -2.6; -6.1 (0.0080) |                   |                    |           |
| <i>Plcg2</i>                                           | ILMN_2601833 | -1.1; -2.1 (0.0000)  |                     |                   |                    |           |
| <i>Trp53inp1</i>                                       | ILMN_2506012 |                      | 5.0; 32 (0.0000)    |                   |                    |           |
| <i>Trp53inp2</i>                                       | ILMN_2457585 |                      | -3.0; -8.0 (0.0024) |                   |                    |           |

<sup>†</sup>Note that *Ccnd1*, *Cdkn1a* and *Fos* are reported as both IR-associated and TH-responding in the literature. Results of transcript regulation of respective signature genes in thyroid tissue adapted from Langen *et al.* (16). Adjusted p-values given as 0.0000 designate values below 10<sup>-5</sup>, i.e. values below the Nexus Expression limit. Conv., convoluted data; deconv., deconvolved data; cF, cell frequency (as used for deconvolution)
