# Supplementary material for: Deconvolution of expression microarray data reveals 131I-induced responses otherwise undetected in thyroid tissue
Source: PubMed Central journal article supplement (PMC6042689; doi:10.1371/journal.pone.0197911), 2018-07-12
Supplement: pone.0197911.s009.pdf [file pone.0197911.s009.pdf]

**Supplemental Table 7. TH-responding gene signature for higher and lower C-cell frequency estimates**

| Gene symbol                | Probe ID     | Thyroid tissue<br>(conv.) | Follicular cells<br>(deconv.)                          |                     |                    |                     | C-cells<br>(deconv.) |  |
|----------------------------|--------------|---------------------------|--------------------------------------------------------|---------------------|--------------------|---------------------|----------------------|--|
|                            |              |                           | log <sub>2</sub> ratio; fold change (adjusted p-value) |                     |                    |                     |                      |  |
|                            |              |                           | cF = 0.11                                              | cF = 0.05           | cF = 0.11          | cF = 0.05           |                      |  |
| <i>Atp2a1</i>              | ILMN_2666864 | 5.3; 41 (0.0000)          | 7.8; 223 (0.0000)                                      | 7.5; 178 (0.0000)   | 11; 1552 (0.0000)  | 11; 1500 (0.0000)   |                      |  |
| <i>Camkk1</i>              | ILMN_1242310 |                           | -2.2; -4.6 (0.0045)                                    |                     |                    |                     |                      |  |
| <i>Camkk2</i>              | ILMN_1256263 |                           |                                                        |                     | -3.9; -15 (0.0001) |                     |                      |  |
| <i>Ccnd1</i>               | ILMN_1221503 | -0.92; -1.9 (0.0019)      |                                                        | 2.7; 6.6 (0.0022)   |                    |                     |                      |  |
|                            | ILMN_2601471 | -0.91; -1.9 (0.0002)      |                                                        |                     |                    |                     |                      |  |
| <i>Cd44</i>                | ILMN_3114585 | -0.69; -1.6 (0.0001)      | -3.2; -9.2 (0.0000)                                    | -3.0; -8.0 (0.0000) |                    |                     |                      |  |
|                            | ILMN_2754990 |                           |                                                        |                     | -5.6; -49 (0.0000) | -7.4; -166 (0.0000) |                      |  |
| <i>Cdkn1a</i> <sup>†</sup> | ILMN_2846775 |                           | -3.4; -11 (0.0001)                                     |                     |                    |                     |                      |  |
| <i>Egf</i>                 | ILMN_2684104 | -4.9; -31 (0.0000)        |                                                        |                     | -5.3; -39 (0.0000) | -5.3; -40 (0.0000)  |                      |  |
| <i>Egfr</i>                | ILMN_3128725 |                           |                                                        |                     | -4.9; -30 (0.0095) | -5.2; -36 (0.0000)  |                      |  |
| <i>Fos</i> <sup>†</sup>    | ILMN_2750515 |                           | 5.0; 32 (0.0001)                                       | 3.8; 14 (0.0002)    |                    |                     |                      |  |
| <i>Hnrnp3 (Hnrph3)</i>     | ILMN_2958912 |                           | 5.7; 52 (0.0000)                                       |                     |                    |                     |                      |  |
| <i>Lmo2</i>                | ILMN_2767605 | -1.2; -2.3 (0.0000)       |                                                        |                     |                    |                     |                      |  |
| <i>Mbp</i>                 | ILMN_3081854 |                           | -2.9; -7.5 (0.0037)                                    |                     |                    |                     |                      |  |
| <i>Pck1</i>                | ILMN_1213632 | 1.2; 2.3 (0.0001)         |                                                        | 2.2; 4.7 (0.0095)   |                    |                     |                      |  |
| <i>Pfkp</i>                | ILMN_2673233 |                           |                                                        |                     | 5.7; 52 (0.0000)   | 7.1; 133 (0.0000)   |                      |  |
| <i>Pik3c2a</i>             | ILMN_1252098 |                           | -2.5; -5.7 (0.0087)                                    |                     |                    |                     |                      |  |
| <i>Prkag2</i>              | ILMN_3161626 | 0.80; 1.7 (0.0002)        |                                                        |                     |                    |                     |                      |  |
| <i>Prkca</i>               | ILMN_1217890 |                           | -1.9; -3.7 (0.0092)                                    |                     |                    |                     |                      |  |
| <i>Rcan2</i>               | ILMN_3033007 |                           | -5.0; -32 (0.0000)                                     | -1.5; -2.7 (0.0003) |                    |                     |                      |  |
| <i>Slc16a6</i>             | ILMN_1258950 | -0.91; -1.9 (0.0005)      |                                                        |                     |                    |                     |                      |  |
| <i>Slc2a1</i>              | ILMN_1258159 | -0.94; -1.9 (0.0007)      |                                                        | -3.2; -9.5 (0.0001) |                    |                     |                      |  |
| <i>Sms</i>                 | ILMN_1232323 |                           | -2.3; -4.9 (0.0003)                                    |                     |                    |                     |                      |  |
| <i>Vldlr</i>               | ILMN_1218264 | 1.1; 2.2 (0.0000)         |                                                        |                     |                    |                     |                      |  |
|                            | ILMN_2515601 | 1.1; 2.2 (0.0000)         |                                                        |                     |                    |                     |                      |  |
|                            | ILMN_2796472 | 1.1; 2.2 (0.0000)         |                                                        |                     |                    |                     |                      |  |

<sup>†</sup>Note that *Ccnd1*, *Cdkn1a* and *Fos* are reported as both IR-associated and TH-responding in the literature. Results of transcript regulation of respective signature genes in thyroid tissue adapted from Langen *et al.* (16). Adjusted p-values given as 0.0000 designate values below 10<sup>-5</sup>, i.e. values below the Nexus Expression limit. Conv., convoluted data; deconv., deconvoluted data; cF, cell frequency (as used for deconvolution)
